# Supplementary material for: Development and validation of a novel computer-aided score to predict the risk of in-hospital mortality for acutely ill medical admissions in two acute hospitals using their first electronically recorded blood test results and vital signs: a cross-sectional study
Source: PubMed Central journal article supplement — BMJ Open. 2018 Dec 6;8(12):e022939. doi: 10.1136/bmjopen-2018-022939 (PMC6286481; doi:10.1136/bmjopen-2018-022939), 2018-12-06
Supplement: bmjopen-2018-022939.draft_revisions.pdf [file bmjopen-2018-022939.draft_revisions.pdf]

# BMJ Open

BMJ Open is committed to open peer review. As part of this commitment we make the peer review history of every article we publish publicly available.

When an article is published we post the peer reviewers' comments and the authors' responses online. We also post the versions of the paper that were used during peer review. These are the versions that the peer review comments apply to.

The versions of the paper that follow are the versions that were submitted during the peer review process. They are not the versions of record or the final published versions. They should not be cited or distributed as the published version of this manuscript.

BMJ Open is an open access journal and the full, final, typeset and author-corrected version of record of the manuscript is available on our site with no access controls, subscription charges or pay-per-view fees (<http://bmjopen.bmj.com>).

If you have any questions on BMJ Open's open peer review process please email [info.bmjopen@bmj.com](mailto:info.bmjopen@bmj.com)

# BMJ Open

**Development and validation of a novel computer-aided score to predict the risk of in-hospital mortality for acutely ill medical admissions using their first electronically recorded blood test results and vital signs.**

|                               |                                                                                                                                                                                                                                                                                                                                                                                                                                                                                                                                                                                                                                                                                                                                                                                                                                                                                                                                                                                               |
|-------------------------------|-----------------------------------------------------------------------------------------------------------------------------------------------------------------------------------------------------------------------------------------------------------------------------------------------------------------------------------------------------------------------------------------------------------------------------------------------------------------------------------------------------------------------------------------------------------------------------------------------------------------------------------------------------------------------------------------------------------------------------------------------------------------------------------------------------------------------------------------------------------------------------------------------------------------------------------------------------------------------------------------------|
| Journal:                      | <i>BMJ Open</i>                                                                                                                                                                                                                                                                                                                                                                                                                                                                                                                                                                                                                                                                                                                                                                                                                                                                                                                                                                               |
| Manuscript ID                 | bmjopen-2018-022939                                                                                                                                                                                                                                                                                                                                                                                                                                                                                                                                                                                                                                                                                                                                                                                                                                                                                                                                                                           |
| Article Type:                 | Research                                                                                                                                                                                                                                                                                                                                                                                                                                                                                                                                                                                                                                                                                                                                                                                                                                                                                                                                                                                      |
| Date Submitted by the Author: | 15-Mar-2018                                                                                                                                                                                                                                                                                                                                                                                                                                                                                                                                                                                                                                                                                                                                                                                                                                                                                                                                                                                   |
| Complete List of Authors:     | Faisal, Muhammad; University of Bradford; Bradford Institute for Health Research<br>Scally, Andrew ; University of Bradford, Faculty of Health Studies; Bradford Institute for Health Research<br>Jackson, Natalie; Bradford Institute for Health Research<br>Richardson, Donald; York Teaching Hospital NHS Foundation Trust<br>Beatson, Kevin; York Teaching Hospital NHS Foundation Trust<br>Howes, Robin; Northern Lincolnshire and Goole Hospitals NHS Foundation Trust<br>Speed, Kevin; Northern Lincolnshire and Goole Hospitals NHS Foundation Trust<br>Menon, Madhav; Northern Lincolnshire and Goole Hospitals NHS Foundation Trust<br>Daws, Jeremey; Northern Lincolnshire and Goole Hospitals NHS Foundation Trust<br>Dyson, Judith; University of Hull, Department of Community Health and Social Care<br>Marsh, Claire; Bradford Institute for Health Research<br>Mohammed, Mohammed ; University of Bradford Faculty of Health Studies; Bradford Institute for Health Research |
| Keywords:                     | computer aided risk score, hospital mortality, vital signs and blood test, national early warning score, emergency admission                                                                                                                                                                                                                                                                                                                                                                                                                                                                                                                                                                                                                                                                                                                                                                                                                                                                  |
|                               |                                                                                                                                                                                                                                                                                                                                                                                                                                                                                                                                                                                                                                                                                                                                                                                                                                                                                                                                                                                               |

SCHOLARONE™  
Manuscripts

1  
2  
3  
4  
5  
6  
7  
8  
9  
10  
11  
12  
13  
14  
15  
16  
17  
18  
19  
20  
21  
22  
23  
24  
25  
26  
27  
28  
29  
30  
31  
32  
33  
34  
35  
36  
37  
38  
39  
40  
41  
42  
43  
44  
45  
46  
47  
48  
49  
50  
51  
52  
53  
54  
55  
56  
57  
58  
59  
60

Development and validation of a novel computer-aided score to predict the risk of in-hospital mortality for acutely ill medical admissions using their first electronically recorded blood test results and vital signs.

## Authors

Muhammad Faisal

*Senior Research Fellow in Medical Statistics*

Faculty of Health Studies, University of Bradford, Bradford, UK

Bradford Institute for Health Research

E-mail: [M.Faisal1@bradford.ac.uk](mailto:M.Faisal1@bradford.ac.uk)

Andy Scally

*Medical Statistician*

Faculty of Health Studies, University of Bradford, Bradford, UK

Bradford Institute for Health Research

E-mail: [A.J.Scally@bradford.ac.uk](mailto:A.J.Scally@bradford.ac.uk)

Natalie Jackson

*Health Informatics Senior Project Manager*

Improvement Academy, Bradford Institute for Health Research

E-mail: [Natalie.jackson@yhahsn.nhs.uk](mailto:Natalie.jackson@yhahsn.nhs.uk)

Donald Richardson

*Consultant Renal Physician*

Department of Renal Medicine, York Teaching Hospital NHS Foundation Trust Hospital

E-mail: [drichardson@doctors.org.uk](mailto:drichardson@doctors.org.uk)

Kevin Beatson

*Development Manager*

York Teaching Hospital NHS Foundation Trust

E-mail: [Kevin.Beatson@York.NHS.uk](mailto:Kevin.Beatson@York.NHS.uk)

Robin Howes

*Operational Manager for Electronic Patient Records*

Department of Strategy & Planning

Northern Lincolnshire and Goole Hospitals

E-mail: [robin.howes@nhs.net](mailto:robin.howes@nhs.net)

Kevin Speed

*Consultant Haematologist*

Northern Lincolnshire and Goole Hospitals

E-mail: [kevin.speed@nhs.net](mailto:kevin.speed@nhs.net)

Madhav Menon

*Consultant in respiratory medicine*

Northern Lincolnshire and Goole Hospitals

1  
2  
3 E-mail: [madhav.menon1@nhs.net](mailto:madhav.menon1@nhs.net)  
4

5 Jeremy Daws

6 *Head of Quality Assurance*

7 Northern Lincolnshire and Goole Hospitals

8 E-mail: [Jeremy.daws@nhs.net](mailto:Jeremy.daws@nhs.net)  
9

10 Judith Dyson

11 *Senior Lecturer Mental Health*

12 University Of Hull

13 E-mail: [J.Dyson@hull.ac.uk](mailto:J.Dyson@hull.ac.uk)  
14

15 Claire Marsh

16 *Senior Research Fellow/ Patient & Public Engagement Lead*

17 Improvement Academy, Bradford Institute for Health Research

18 E-mail: [claire.marsh@bthft.nhs.uk](mailto:claire.marsh@bthft.nhs.uk)  
19

20 Mohammed A Mohammed

21 *Professor of Healthcare Quality & Effectiveness*

22 Faculty of Health Studies, University of Bradford, Bradford, UK

23 Deputy Director of the Bradford Institute for Health Research

24 Academic Director to the Yorkshire & Humber Academic Health Sciences Network

25 E-mail: [M.A.Mohammed5@Bradford.ac.uk](mailto:M.A.Mohammed5@Bradford.ac.uk)  
26

27  
28 Corresponding author: Muhammad Faisal [M.Faisal1@bradford.ac.uk](mailto:M.Faisal1@bradford.ac.uk)  
29  
30  
31  
32  
33  
34  
35  
36  
37  
38  
39  
40  
41  
42  
43  
44  
45  
46  
47  
48  
49  
50  
51  
52  
53  
54  
55  
56  
57  
58  
59  
60

## Abstract

**Objective:** There are no established mortality risk equations specifically for emergency medical patients who are admitted to a general hospital ward. Such risk equations may be useful in supporting the clinical decision making process. We aim to develop and externally validate a computer-aided risk of mortality (CARM) score by combining the first electronically recorded vital signs and blood test results for emergency medical admissions.

**Materials:** We extracted details of all adult emergency medical admissions from two acute hospitals (NH – model development data; YH – external validation data) discharged over a 24-month period with vital signs and blood test results. We report the performance of the CARM score in terms of the c-statistic.

**Results:** The risk of in-hospital mortality following emergency medical admission was 5.7% (NH: 1766/30996) and 6.5% (YH: 1703/26247). The c-statistic for the CARM score in NH was 0.87 (95% CI 0.86 to 0.88) and was similar in an external hospital setting YH (0.86, 95% CI 0.85 to 0.87).

**Conclusions:** We have developed a novel, externally validated CARM score with good performance characteristics for estimating the risk of in-hospital mortality following an emergency medical admission using the patient's first, electronically recorded, vital signs and blood tests results. Since the CARM score places no additional data collection burden on clinicians and is readily automated, it may now be carefully introduced and evaluated in hospitals with sufficient informatics infrastructure.

**Key words:** computer aided risk score, hospital mortality, vital signs and blood test, national early warning score, emergency admission

**Article Summary**

- There are no established mortality risk equations specifically for emergency medical patients who are admitted to a general ward, usually via a medical admissions unit.
- This study provides a novel computer-aided risk of mortality (CARM) score by combining the first electronically recorded vital signs and blood test results for emergency medical admissions.
- CARM is externally validated and places no additional data collection burden on clinicians and is readily automated.
- CARM is not intended for hospitals without sufficient IT infrastructure
- About 20-30% of admissions do not have both NEWS and blood test results and so CARM is not applicable to these admissions.

## Introduction

Unplanned or emergency medical admissions to hospital involve patients with a broad spectrum disease and illness severity [1]. The appropriate early assessment and management of such admissions can be a critical factor in ensuring high quality care [2]. A number of scoring systems have been developed which may support this clinical decision making process but few have been externally validated [1]. We propose to develop a computer aided risk of in-hospital mortality score, following emergency medical admission that automatically combines two routinely collected, electronically recorded, clinical data sets – vital signs and blood test results. There is some evidence to suggest that the results of routinely undertaken blood tests and/or vital signs data may be useful in predicting the risk of death [1].

In the United Kingdom (UK) National Health Service (NHS), the patient's vital signs are monitored and summarised into a National Early Warning Score(s) (NEWS) that is mandated by the Royal College of Physicians (London) [3]. NEWS is derived from seven physiological variables or vital signs – respiration rate, oxygen saturations, any supplemental oxygen, temperature, systolic blood pressure, heart rate and level of consciousness (Alert, Voice, Pain, Unresponsive) – which are routinely collected by nursing staff as an integral part of the process of care, usually for all patients, and then repeated thereafter depending on local hospital protocols [3]. The use of NEWS is relevant because “Patients die not from their disease but from the disordered physiology caused by the disease” [4]. NEWS points are allocated according to basic clinical observations and the higher the NEWS the more likely it is that the patient is developing a critical illness (see appendix for further details of the NEWS). The clinical rationale for NEWS is that early recognition of deterioration in the vital signs of a patient can provide opportunities for earlier, more effective intervention. Furthermore, studies have shown that electronically collected NEWS are highly reliable and accurate when compared with paper based methods [5–8].

1  
2  
3 Blood tests are an integral part of clinical medicine, and are routinely undertaken during a patient's  
4 stay in hospital. Typically, routine blood tests consist of a core list of seven biochemical and  
5 haematological tests, (albumin, creatinine, potassium, sodium, urea, haemoglobin, white blood cell  
6 count) and, in the absence of contraindications and subject to patient consent, almost all patients  
7 admitted to hospital undergo these tests on admission. Furthermore, in the UK National Health  
8 Service (NHS) creatinine blood test results are now used to identify patients at risk of Acute Kidney  
9 Injury (AKI) [9] which is an important cause of avoidable patient harm [10].

10  
11  
12  
13  
14  
15  
16  
17  
18 In this paper, we investigate the extent to which the vital signs and blood test results of acutely ill  
19 patients can be used to predict the risk of in-hospital mortality following emergency admission to  
20 hospital. Our aim is to develop and validate an automated, Computer Aided Risk of Mortality (CARM)  
21 model, using the patient's first, electronically recorded, vital signs and blood test results which are  
22 usually available within a few hours of emergency admission without requiring any additional data  
23 items or prompts from clinicians. CARM, therefore, is designed for use in hospitals with sufficient  
24 informatics infrastructure.

## 25 26 27 28 29 30 31 32 33 34 **Methods**

### 35 36 **Setting & data**

37  
38  
39 Our cohorts of emergency medical admissions are from three acute hospitals which are  
40 approximately 100 kilometres apart in the Yorkshire & Humberside region of England – the Diana,  
41 Princess of Wales Hospital (n~400 beds) and Scunthorpe General Hospital (n~400 beds) managed by  
42 the Northern Lincolnshire and Goole NHS Foundation Trust (NLAG), and York Hospital (YH) (n~700  
43 beds) (managed by York Teaching Hospitals NHS Foundation Trust). The data from the two acute  
44 hospitals from NLAG are combined because this reflects how the hospitals are managed and are  
45 referred to as NLAG Hospitals (NH), which essentially places our study in two acute hospitals. Our  
46 study hospitals (NH, YH respectively) have been exclusively using electronic NEWS scoring since at  
47 least 2013 as part of their in-house electronic patient record systems. We chose these hospitals



1  
2  
3 because they had electronic NEWS which are collected as part of the patient's process of care and  
4  
5 were agreeable to the study. We did not approach any other hospital.  
6

7  
8 We considered all adult (age $\geq$ 16 years) emergency medical admissions, discharged during a 24-  
9  
10 month period (1 January 2014 to 31 December 2015), with blood test results and NEWS. For each  
11  
12 admission, we obtained a pseudonymised patient identifier, the patient's age (years), sex  
13  
14 (male/female), discharge status (alive/dead), admission and discharge date and time, and electronic  
15  
16 NEWS. The NEWS ranged from 0 (indicating the lowest severity of illness) to 19 (the maximum  
17  
18 NEWS value possible is 20). The admission/discharge date and electronically recorded NEWS are  
19  
20 date and time stamped and the index NEWS was defined as the first electronically recorded score  
21  
22 within  $\pm$ 24 hours of the admission time. The first blood test results were defined as the first full set  
23  
24 of blood tests results recorded within 4 days (96 hours) of admission (>90% of blood test results  
25  
26 were within  $\pm$ 24 hours of admission - see table S1 in appendix).  
27

28  
29 For model development purposes, we were unable to consider emergency admissions without  
30  
31 complete blood test results and NEWS recorded – this constituted 16.5% (6104/37100) of records in  
32  
33 NH and 28.6% (10504/36751) of records in YH. We excluded records for the following reasons: (1)  
34  
35 Records where the first NEWS was after 24 hours of admission and/or (2) where the first blood test  
36  
37 was after 4 days of admission because these “delayed” data were considered less likely to reflect the  
38  
39 sickness profile of patients on admission. Moreover, the time from admission to first blood test  
40  
41 results was usually several hours earlier than the actual time of admission because blood tests can  
42  
43 be ordered in the emergency department before formal admission (see figure S1 in appendix).  
44  
45  
46  
47  
48

## 49 Development of a Computer Aided Risk of Mortality (CARM) Score

50  
51 We began with exploratory analyses including scatter plots and box plots that showed the  
52  
53 relationship between covariates and risk of in-hospital death in our hospitals. We developed a  
54  
55 logistic regression model, known as CARM, to predict the risk of in-hospital death with the following  
56  
57

1  
2  
3 covariates: Age (years), Sex (Male/Female), NEWS (including its components, plus diastolic blood  
4 pressure, as separate covariates), blood test results (albumin, creatinine, haemoglobin, potassium,  
5 sodium, urea, and white cell count), and Acute Kidney Injury (AKI) score. We used the *qladder*  
6 function (*Stata* [11]), which displays the quantiles of transformed variable against the quantiles of a  
7 normal distribution according to the ladder powers ( $x^3, x^2, x^1, x, \sqrt{x}, \log(x), x^{-1}, x^{-2}, x^{-3}$ ) for  
8 each variable continuous covariate and chose the following transformations:- (creatinine)<sup>-1/2</sup>,  
9  $\log_e(\text{potassium})$ ,  $\log_e(\text{white cell count})$ ,  $\log_e(\text{urea})$ ,  $\log_e(\text{respiratory rate})$ ,  $\log_e(\text{pulse rate})$ ,  $\log_e(\text{systolic}$   
10  $\text{blood pressure})$ , and  $\log_e(\text{diastolic blood pressure})$ . We used an automated approach to search for all  
11 two-way interactions and incorporated those interactions which were statistically significant  
12 ( $p < 0.001$ ) implemented in the *MASS* library [12] in *R* [13].

13  
14  
15  
16  
17  
18  
19  
20  
21  
22  
23  
24 We developed the CARM model to predict the risk of in-hospital mortality following emergency  
25 medical admission using data from NH (the development dataset) and we externally validated this  
26 model, reporting discrimination and calibration characteristics [14], using data from another hospital  
27 (YH) (the external validation dataset). The data from YH is not used for model development but as an  
28 external validation dataset only. We internally validated the CARM using a bootstrapping method  
29 that is implemented in the *rms* library [15] in *R* to estimate statistical optimism [14,15].

30  
31  
32  
33  
34  
35  
36  
37 Discrimination relates to how well a model can separate, (or discriminate between), those who died  
38 and those who did not. Calibration measures a model's ability to generate predictions that are on  
39 average close to the average observed outcome. Overall statistical performance was assessed using  
40 the scaled Brier score which incorporates both discrimination and calibration [14]. The Brier score is  
41 the squared difference between actual outcomes and predicted risk of death, scaled by the  
42 maximum Brier score such that the scaled Brier score ranges from 0–100%. Higher values indicate  
43 superior models. For calibration, we used the popular Hosmer-Lemeshow (HL) deciles of risk  
44 goodness of fit test [16] that compares observed versus predicted number of deaths, although  
45 studies have noted that this test is less useful for assessing calibration when models are developed  
46  
47  
48  
49  
50  
51  
52  
53  
54  
55  
56  
57  
58  
59  
60

1  
2  
3 on large sample sizes because small differences between observed and predicted values reach  
4 statistical significance [17,18].

5  
6  
7 The concordance statistic (c-statistic) is a commonly used measure of discrimination. For a binary  
8 outcome, the c-statistic is the area under the Receiver Operating Characteristics (ROC) curve. The  
9 ROC curve is a plot of the sensitivity, (true positive rate), versus 1-specificity, (false positive rate), for  
10 consecutive predicted risks [14]. The area under the ROC curve is interpreted as the probability that  
11 a deceased patient has a higher risk of death than a randomly chosen non-deceased patient. A c-  
12 statistic of 0.5 is no better than tossing a coin, whilst a perfect model has a c-statistic of 1. The higher  
13 the c-statistic, the better the model. In general, values less than 0.7 are considered to show poor  
14 discrimination, values of 0.7–0.8 can be described as reasonable, and values above 0.8 suggest good  
15 discrimination [19]. The 95% confidence interval for the c-statistic was derived using DeLong's  
16 method as implemented in the *pROC* library [20] in *R* [13]. Box plots showing the risk of death for  
17 those discharged alive and dead are a simple way to visualise the discrimination of each model. The  
18 difference in the mean predicted risk of death for those who were discharged alive and dead is a  
19 measure of the discrimination slope. The higher the slope, the better the discrimination [14]. All  
20 analyses were carried using *R* [13] and *Stata* [11].

## 21 22 23 24 25 26 27 28 29 30 31 32 33 34 35 36 37 Ethical approval

38  
39  
40 This study received ethical approval from The Yorkshire & Humberside Leeds West Research Ethics  
41 Committee on 17 September 2015 (ref. 173753), with NHS management permissions received  
42 January 2016.

## 43 44 45 46 47 Patient and Public Involvement

48  
49 A workshop with a patient and service user group, linked to the University of Bradford, was involved  
50 at the start of this project to co-design the agenda for the patient and staff focus groups which were  
51 subsequently held at each hospital site. Patients were invited to attend the patient focus group  
52 through existing patient and public involvement groups. The criteria used for recruitment to these  
53  
54  
55  
56  
57

1  
2  
3 focus group was any member of the public who had been a patient or carer in the last five years. The  
4  
5 patient and public voice continued to be included throughout the project with three patient  
6  
7 representatives invited to sit on the project steering group. Participants will be informed of the  
8  
9 results of this study through the patient and public involvement leads at each hospital site and the  
10  
11 project team have met with the Bradford Patient and service user group to discuss the results.  
12

### 13 14 Data Sharing Statement

15  
16 Our data sharing agreement with the two hospitals (York hospital & NLAG hospital) does not permit  
17  
18 us to share this data with other parties. Nonetheless if anyone is interested in the data, then they  
19  
20 should contact the R&D offices at each hospital in the first instance.  
21  
22

## 23 24 Results

### 25 26 Cohort description

27  
28 We considered emergency medical admissions in each hospital (NH:n=37100, YH:n=36751) over the  
29  
30 24-month period. Of these 16.5% (6104/37100) in NH and 28.6% (10504/36751) in YH were not  
31  
32 eligible for our study because they did not have NEWS recorded within  $\pm 24$  hours of admission  
33  
34 and/or full complement of blood test results within  $\pm 96$  hours of admission (Table 1). At YH, 24.2% of  
35  
36 records were excluded because no or incomplete blood test results were recorded compared with  
37  
38 only 10% in NH. Exclusions due to lack of NEWS data were less marked between YH and NH. Missing  
39  
40 blood tests were seen to occur more frequently with patients discharged alive versus those that  
41  
42 died.  
43  
44

45  
46 The in-hospital mortality was 5.7% (1766/30996) in NH and 6.5% (1703/26247) in YH. The age, sex,  
47  
48 NEWS and blood test results profile is shown Table 2. Admissions in YH were older, with higher  
49  
50 NEWS, higher AKI scores (AKI stage 3 is more common than stage 2 in YH) but higher albumin blood  
51  
52 test results than NH. YH has a renal unit whereas NH does not.  
53  
54  
55  
56  
57  
58  
59

1  
2  
3 Figures S2 to S5 (see appendix) show box plots and scatter plots for each continuous  
4 (untransformed) covariate that was included in the CARM model for NH and YH respectively. The  
5 box plots (figures S2 & S3 in appendix) show a similar pattern in each hospital. Compared with  
6 patients discharged alive, the deceased patients were aged older, with lower albumin, haemoglobin  
7 and sodium values, and higher creatinine, potassium, white cell count and urea values. NEWS was  
8 higher in deceased patients compared with patients discharged alive, as were temperature, blood  
9 pressure and oxygen saturation values. The respiratory rate and pulse rate were lower in deceased  
10 patients. The scatter plots in the appendix (figures S4 & S5 in appendix) show that the relationship  
11 between a given continuous covariate and the risk of death is similar in each hospital.  
12  
13  
14  
15  
16  
17  
18  
19  
20  
21

## 22 Statistical Modelling of CARM

23  
24  
25 We assessed the performance of the CARM model to predict the risk of in-hospital mortality. The  
26 model coefficients (logit scale) and external validation plots are shown in the appendix. Table 3  
27 shows the performance of the model in the development and validation dataset. Figure 1 shows the  
28 ROC plots in the development and validation datasets. The c-statistic was high in the development  
29 dataset 0.87 [95% CI 0.86 - 0.88] and the external validation dataset 0.86 [95% CI 0.85 - 0.87].  
30 Likewise, the scaled Brier score and discrimination were similar in the development and external  
31 validation datasets. The Hosmer-Lemeshow (HL) showed poor calibration ( $p$ -value $<0.001$ ). However,  
32 after adjusting for 'calibration-in-the-large' (see appendix), our calibration slope is 1.0, which is ideal  
33 (see appendix Figure S6).  
34  
35  
36  
37  
38  
39  
40  
41  
42  
43  
44

45 The final CARM model, which is not intended for paper-based use, is shown in the appendix with  
46 accompanying internal and external validation plots (see appendix figure S6).  
47  
48

49 We excluded 10.0% (NH) and 24.2% (YH) of emergency admissions from the development and  
50 validation dataset respectively, because they had no or incomplete set of blood test results  
51 reported. We examined the performance of the CARM model in these excluded records by first  
52 imputing age and sex specific median blood test results, and then applying the CARM model to these  
53  
54  
55  
56  
57  
58  
59  
60

1  
2  
3 admissions only. The last column in Table 3 shows the subsequent c-statistics in these imputed  
4 records only. The c-statistics for these imputed records were not markedly different in the  
5 development and validation dataset (see Figure S7 appendix for corresponding ROC plots).  
6  
7

8  
9 Table 4 shows the sensitivity, specificity and positive predictive value for a selected range of cut-off  
10 values for the risk of dying, which tentatively suggests that a threshold risk of 8% provides a  
11 reasonable balance between sensitivity (around 70%) and specificity (more than 80% in  
12 development and validation datasets – see table 4 and figure S8 in appendix).  
13  
14  
15  
16  
17

## 18 Discussion

19 We have shown that it is feasible to use the first electronically-recorded vital signs and blood test  
20 results of an emergency medical patient to predict the risk of in-hospital mortality following  
21 emergency medical admission. We developed our CARM model in one hospital and externally  
22 validated in data from another hospital. We found that CARM has good performance and our  
23 findings tentatively suggest that a cut-off of 8% predicted risk of in-hospital mortality death appears  
24 to strike a reasonable balance between sensitivity and specificity.  
25  
26  
27  
28  
29  
30  
31  
32  
33

34 Whilst several previous studies [1] have used blood test results [21–28] or patient physiology [29,30]  
35 to predict the risk of in-hospital mortality, few studies have combined these two data sources [31–  
36 34] and even fewer reported external validation [1]. Our study is based on data from two different  
37 hospitals with material differences in recording of blood test results but still yielding similar  
38 performance of CARM. This suggests that our approach, which merits further study, may be  
39 generalisable to other UK NHS hospitals with electronically-recorded blood test results and NEWS –  
40 especially as the use of NEWS in the UK NHS is mandated and that our approach does not rely on  
41 reference ranges from blood tests which can vary between hospitals. Indeed, a recent paper with  
42 sepsis as the outcome variable also showed promising results by combining the first blood test  
43 results and NEWS [35].  
44  
45  
46  
47  
48  
49  
50  
51  
52  
53  
54  
55  
56  
57  
58  
59  
60

1  
2  
3 There are a number of limitations in our study. There appears to be a systematic difference in the  
4 prevalence of oxygen supplementation in the development and validation datasets, which may  
5 warrant further investigation. However, the prevalence ratios (dead/alive) are similar in both groups  
6 (2.77 and 3.29 for NH and YH, respectively) and therefore this should have no significant detrimental  
7 effect on the validity of our model. Although we focused on in-hospital mortality (because we aimed  
8 to aid clinical decision making in the hospital), the impact of this selection bias needs to be assessed  
9 by capturing out-of-hospital mortality by linking death certification data and hospital data. CARM,  
10 like other risk scores, can only be an aid to the decision-making process of clinical teams [1,19] and  
11 its usefulness in clinical practice remains to be seen. We found that up to about ¼ of emergency  
12 medical admissions had no (or an incomplete set of) recorded blood test results for whom we tested  
13 a simple median imputation strategy without knowing why such data was missing. We found that  
14 the performance of CARM did not materially deteriorate in these admissions. We do not suggest  
15 that our imputation method is an optimal imputation strategy. Rather we offer it as a simple,  
16 pragmatic, preliminary imputation strategy, which is akin to the AKI detection algorithm which also  
17 imputes the median creatinine value where required [36]. We did not undertake an imputation  
18 exercise for patients with no recorded NEWS because they constituted a much smaller proportion of  
19 missing data (<5%), and NEWS is not recommended in patients requiring immediate resuscitation,  
20 direct admission to intensive care, and patients with end-stage renal failure or with acute  
21 intracranial conditions [37]. We have used the first set of electronically recorded vital signs and  
22 blood test results to develop CARM, but updating CARM scores in real-time when new data becomes  
23 available is likely to be important to clinical teams and so warrants further study.

24  
25  
26  
27  
28  
29  
30  
31  
32  
33  
34  
35  
36  
37  
38  
39  
40  
41  
42  
43  
44  
45  
46  
47  
48 We have designed CARM to be used in hospitals with sufficient informatics infrastructure (eg  
49 electronic health records) [38,39]. CARM is not targeting specific emergency medical patients only.  
50 Rather, we are seeking to raise situational awareness of the risk of death in-hospital as early as  
51 possible, without requiring any additional data items or prompts from clinicians. Whilst we have  
52  
53  
54  
55  
56  
57  
58  
59  
60

1  
2  
3 demonstrated that CARM has potential, we have yet to test its use in routine clinical practice. This is  
4  
5 important because we need to demonstrate that CARM does more “good” than “harm” in practice  
6  
7 [38,39]. For example, whilst routine blood tests are not indicated in a considerable number of  
8  
9 emergency medical admissions, it is nevertheless possible that for a given patient, some clinicians  
10  
11 (eg less experienced) may be tempted to order routine blood tests so that they can obtain a CARM  
12  
13 score to support their clinical decision-making process. So, the next phase of this work is to field test  
14  
15 CARM by carefully engineering it into routine clinical practice to see if it does enhance the quality of  
16  
17 care for acutely ill patients, whilst noting any unintended consequences.  
18  
19

## 20 21 Conclusion

22  
23 We have developed a novel, externally validated CARM model, with good performance for  
24  
25 estimating the risk of in-hospital mortality following emergency medical admission using the  
26  
27 patient’s first, electronically recorded, vital signs and blood test results. Since CARM places no  
28  
29 additional data collection burden on clinicians and is readily automated, it may now be carefully  
30  
31 introduced and evaluated in hospitals with electronic health records.  
32  
33

## 34 35 36 Acknowledgements

37 The authors would like to express their gratitude to Sue Rushbrook and Gary Hardcastle at York  
38  
39 Hospital for their support in obtaining the data frame, and to Laura Lamming at the University of  
40  
41 Bradford for her support with the Ethics application.  
42  
43

## 44 45 Funding

46 This research was supported by the Health Foundation. The Health Foundation is an independent  
47  
48 charity working to improve the quality of health care in the UK.  
49

50 This research was supported by the National Institute for Health Research (NIHR) Yorkshire and  
51  
52 Humberside Patient Safety Translational Research Centre (NIHR YHPSTRC). The views expressed in  
53  
54



1  
2  
3 this article are those of the author(s) and not necessarily those of the NHS, the NIHR, or the  
4  
5 Department of Health and Social Care.

### 6 7 **Contributorship**

8 MAM & DR had the original idea for this work. NJ was overall study coordinator with JeD as local  
9  
10 NLAG coordinator. MF, AS and MAM undertook the statistical analyses. JuD, CM & NJ are leads for  
11  
12 qualitative studies. RH and KB extracted the necessary data frames. DR, MM and KS gave a clinical  
13  
14 perspective. MAM and MF wrote the first draft of this paper and all authors subsequently assisted in  
15  
16 redrafting and have approved the final version. MAM will act as guarantor.  
17  
18

19  
20 **Competing Interests:** The authors declare no conflicts of interest.  
21  
22  
23  
24  
25  
26  
27  
28  
29  
30  
31  
32  
33  
34  
35  
36  
37  
38  
39  
40  
41  
42  
43  
44  
45  
46  
47  
48  
49  
50  
51  
52  
53  
54  
55  
56  
57  
58  
59  
60

**Table 1 Number and mortality of emergency medical admissions included/excluded.**

| Characteristic                                                   | Development dataset (NH) |            | Validation dataset (YH) |            |
|------------------------------------------------------------------|--------------------------|------------|-------------------------|------------|
|                                                                  | N (%)                    | Died (%)   | N (%)                   | Died (%)   |
| Total emergency medical admissions                               | 37100                    | 2171 (5.9) | 36751                   | 2137 (5.8) |
| Excluded: No NEWS recorded (%)                                   | 1305 (3.5)               | 212 (16.3) | 772 (2.1)               | 47 (6.1)   |
| Excluded: First NEWS after 24 hours of admission (%)             | 634 (1.7)                | 59 (9.3)   | 172 (0.5)               | 10 (5.8)   |
| Excluded: First blood test results after 4 days of admission (%) | 464 (1.3)                | 31 (6.7)   | 673 (1.8)               | 83 (12.3)  |
| Excluded: No or incomplete blood test results recorded (%)       | 3701 (10.0)              | 103 (2.8)  | 8887 (24.2)             | 294 (3.3)  |
| Total excluded (%)                                               | 6104 (16.5)              | 405 (6.6)  | 10504 (28.6)            | 434 (4.1)  |
| Total included (%)                                               | 30996 (83.5)             | 1766 (5.7) | 26247 (71.4)            | 1703 (6.5) |

**Table 2 Characteristics of emergency admissions for development and validation datasets.**

| Characteristic                                  | Development dataset (NH) |                 | Validation dataset (YH) |                 |
|-------------------------------------------------|--------------------------|-----------------|-------------------------|-----------------|
|                                                 | Discharged Alive         | Discharged Died | Discharged Alive        | Discharged Died |
| N                                               | 29230                    | 1766            | 24544                   | 1703            |
| Median Length of Stay (days) (IQR)              | 4.3 (8.3)                | 8.3 (13.3)      | 3.9 (7.7)               | 8.1 (14.1)      |
| Male (%)                                        | 14557 (49.8)             | 887 (50.2)      | 11646 (47.5)            | 845 (49.6)      |
| Mean NEWS (SD)                                  | 2.1 (2.2)                | 4.5 (3.2)       | 2.5 (2.5)               | 5.0 (3.6)       |
| Alertness                                       |                          |                 |                         |                 |
| Alert (%)                                       | 28788 (98.5)             | 1613 (91.3)     | 23953 (97.6)            | 1503 (88.3)     |
| Pain (%)                                        | 80 (0.3)                 | 31 (1.8)        | 131 (0.5)               | 49 (2.9)        |
| Voice (%)                                       | 315 (1.1)                | 83 (4.7)        | 357 (1.5)               | 106 (6.2)       |
| Unconscious (%)                                 | 47 (0.2)                 | 39 (2.2)        | 103 (0.4)               | 45 (2.6)        |
| AKI Score                                       |                          |                 |                         |                 |
| 0 (%)                                           | 27063 (92.6)             | 1326 (75.1)     | 22133 (90.2)            | 936 (55.0)      |
| 1 (%)                                           | 1358 (4.7)               | 204 (11.6)      | 1482 (6.0)              | 451 (26.5)      |
| 2 (%)                                           | 429 (1.5)                | 129 (7.3)       | 369 (1.5)               | 191 (11.2)      |
| 3 (%)                                           | 380 (1.3)                | 107 (6.1)       | 560 (2.3)               | 125 (7.3)       |
| Oxygen supplementation (%)                      | 5364 (18.4)              | 900 (51.0)      | 2549 (10.4)             | 582 (34.2)      |
| Mean Age [years] (SD)                           | 66.2 (19.5)              | 79.8 (11.1)     | 67.5 (19.4)             | 80 (11.7)       |
| Mean Albumin [g/L] (SD)                         | 33.7 (5.9)               | 27.3 (6.4)      | 38.2 (5.7)              | 32.9 (6)        |
| Mean Creatinine [umol/L] (SD)                   | 103.3 (78.2)             | 148.9 (124.4)   | 100.8 (90.6)            | 138.7 (119)     |
| Mean Haemoglobin [g/l] (SD)                     | 127.8 (22.2)             | 117.1 (22.8)    | 125.2 (22)              | 117.1 (23.2)    |
| Mean Potassium [mmol/L] (SD)                    | 4.1 (0.6)                | 4.3 (0.8)       | 4.3 (0.6)               | 4.4 (0.8)       |
| Mean Sodium [mmol/L] (SD)                       | 137 (5.1)                | 136 (7)         | 136.6 (4.6)             | 136.1 (6.2)     |
| Mean White cell count [ $10^9$ cells/L] (SD)    | 9.8 (6.5)                | 13.2 (13.3)     | 10.2 (10.7)             | 13.9 (21.1)     |
| Mean Urea [mmol/L] (SD)                         | 7.5 (5.6)                | 14.1 (10.5)     | 7.8 (5.6)               | 13.3 (8.9)      |
| Mean Respiratory rate [breaths per minute] (SD) | 18 (3.5)                 | 20.1 (4.8)      | 18.6 (4.6)              | 21.7 (6.8)      |
| Mean Temperature [ $^{\circ}$ C] (SD)           | 36.5 (0.7)               | 36.3 (0.8)      | 36.3 (0.8)              | 36.1 (1.1)      |
| Mean Systolic pressure [mmHg] (SD)              | 129.6 (22.7)             | 119.8 (24.8)    | 136.1 (27.2)            | 128.5 (30.3)    |
| Mean Diastolic pressure [mmHg] (SD)             | 75 (14.8)                | 69.5 (15.8)     | 75.4 (15.5)             | 71.3 (17.7)     |
| Mean Pulse rate [beats per minute] (SD)         | 81.3 (17.7)              | 86.5 (19.7)     | 86.2 (20.9)             | 92.1 (23.3)     |
| Mean % Oxygen saturation (SD)                   | 96.0 (2.9)               | 94.6 (4.7)      | 96.3 (2.9)              | 95.0 (4.4)      |

**Table 3 Comparing calibration and discrimination of CARM model to predict in-hospital mortality in development and validation datasets**

| Dataset             | Chi-square <sup>†</sup> | p-value <sup>†</sup> | Mean predicted risk: Alive | Mean predicted risk: Died <sup>‡</sup> | Discrimination | Scaled Brier Score | AUC [95% CI]                           | Median Imputed AUC [95% CI] |
|---------------------|-------------------------|----------------------|----------------------------|----------------------------------------|----------------|--------------------|----------------------------------------|-----------------------------|
| Development dataset | 24.64                   | 0.002                | 0.047                      | 0.229                                  | 0.183          | 0.175              | 0.874 <sup>#</sup><br>[0.866 to 0.881] | 0.915<br>[0.888 to 0.941]   |
| Validation dataset  | 15.82                   | 0.045                | 0.053                      | 0.231                                  | 0.178          | 0.165              | 0.861<br>[0.852 to 0.869]              | 0.900<br>[0.880 to 0.919]   |

NB:

<sup>†</sup> is based on the Hosmer-Lemeshow deciles of risk goodness of fit test with 8 degrees of freedom.

<sup>‡</sup> Died in-hospital following emergency admission

<sup>#</sup> corrected optimism (original = 0.874, and corrected=0.873).

**Table 4 Sensitivity, specificity and predictive values for the CARM model at various cut-offs in the development dataset and validation dataset**

| Dataset             | Risk Value Cut-off | Sensitivity % | Specificity % | PPV   | NPV   |
|---------------------|--------------------|---------------|---------------|-------|-------|
| Development dataset | 0.01               | 98.53         | 37.95         | 8.75  | 99.77 |
|                     | 0.02               | 95.70         | 53.45         | 11.05 | 99.52 |
|                     | 0.04               | 87.26         | 69.75         | 14.84 | 98.91 |
|                     | 0.08               | 72.20         | 83.59         | 21.00 | 98.03 |
|                     | 0.20               | 41.96         | 95.04         | 33.82 | 96.44 |
| Validation dataset  | 0.01               | 98.41         | 32.11         | 9.14  | 99.66 |
|                     | 0.02               | 95.95         | 47.43         | 11.24 | 99.41 |
|                     | 0.04               | 88.96         | 65.24         | 15.08 | 98.84 |
|                     | 0.08               | 73.17         | 81.16         | 21.22 | 97.76 |
|                     | 0.20               | 43.10         | 94.19         | 34.00 | 95.98 |

PPV = Positive Predictive Value

NPV = Negative Predictive Value

**Figure 1 Area under the Receiver Operating Characteristic curve for development dataset (0.87) and validation dataset (0.86).**

## References

- 1 Brabrand M, Folkestad L, Clausen NG, *et al*. Risk scoring systems for adults admitted to the emergency department: a systematic review. *Scand J Trauma Resusc Emerg Med* 2010;**18**:8. doi:10.1186/1757-7241-18-8
- 2 Silke B, Kellett J, Rooney T, *et al*. An improved medical admissions risk system using multivariable fractional polynomial logistic regression modelling. *QJM An Int J Med* 2010;**103**:23–32. doi:10.1093/qjmed/hcp149
- 3 Physicians RC of. National. Early Warning Score (NEWS): Standardising the assessment of acute illness severity in the NHS <https://www.rcplondon.ac.uk/sites/default/files/documents/national-early-warning-score-standardising-assessment-acute-illness-severity-nhs.pdf>. 2012.
- 4 McGinley A, Pearse RM. A national early warning score for acutely ill patients. *BMJ* 2012;**345**:e5310.
- 5 Smith GB, Prytherch DR, Schmidt P, *et al*. Hospital-wide physiological surveillance—A new approach to the early identification and management of the sick patient. *Resuscitation* 2006;**71**:19–28. doi:10.1016/j.resuscitation.2006.03.008
- 6 Edwards M, McKay H, Van Leuvan C, *et al*. Modified Early Warning Scores: inaccurate summation or inaccurate assignment of score? *Crit Care* 2010;**14**:P257. doi:10.1186/cc8489
- 7 Prytherch DR, Smith GB, Schmidt P, *et al*. Calculating early warning scores—a classroom comparison of pen and paper and hand-held computer methods. *Resuscitation* 2006;**70**:173–8. doi:10.1016/j.resuscitation.2005.12.002
- 8 Mohammed M, Hayton R, Clements G, *et al*. Improving accuracy and efficiency of early warning scores in acute care. *Br J Nurs*; **18**:18–24. doi:10.12968/bjon.2009.18.1.32072
- 9 NHS England: Acute Kidney Injury (AKI) Programme. <http://www.thinkkidneys.nhs.uk>, 2014. <http://www.england.nhs.uk/ourwork/patientsafety/akiprogramme/>.
- 10 NCEPOD: Acute Kidney Injury: Adding Insult to Injury. National Confidential Enquiry into Patient Outcome and Death, 2009.
- 11 StatCorp. Stata: Release 13. Statistical Software. College Station, TX: StataCorp LP; 2014.
- 12 Venables W, Ripley B. *Modern Applied Statistics with S*. Fourth Edi. New York: : Springer 2002.
- 13 R Development Core Team. R: A language and environment for statistical computing. R Foundation for Statistical Computing <http://www.r-project.org/>. 2015.
- 14 Steyerberg EW. *Clinical Prediction Models. A practical approach to development, validation and updating*. Springer 2008.
- 15 Harrell FE. rms: Regression Modeling Strategies <http://cran.r-project.org/package=rms>. 2015.
- 16 Lemeshow S, Hosmer DW. A review of goodness of fit statistics for use in the development of logistic regression models. *Am J Epidemiol* 1982;**115**:92–106.
- 17 Kramer AA, Zimmerman JE. Assessing the calibration of mortality benchmarks in critical care: The Hosmer-Lemeshow test revisited\*. *Crit Care Med* 2007;**35**:2052–6.

- doi:10.1097/01.CCM.0000275267.64078.B0
- 18 Paul P, Pennell ML, Lemeshow S. Standardizing the power of the Hosmer-Lemeshow goodness of fit test in large data sets. *Stat Med* 2013;**32**:67–80. doi:10.1002/sim.5525
- 19 Hanley JA, McNeil BJ. The meaning and use of the area under a receiver operating characteristic (ROC) curve. *Radiology* 1982;**143**:29–36. doi:10.1148/radiology.143.1.7063747
- 20 Robin X, Turck N, Hainard A, *et al.* pROC: an open-source package for R and S+ to analyze and compare ROC curves. *BMC Bioinformatics* 2011;**12**:77. doi:10.1186/1471-2105-12-77
- 21 Prytherch DR, Sirl JS, Weaver PC, *et al.* Towards a national clinical minimum data set for general surgery. *Br J Surg* 2003;**90**:1300–5. doi:10.1002/bjs.4274
- 22 Prytherch DR, Sirl JS, Schmidt P, *et al.* The use of routine laboratory data to predict in-hospital death in medical admissions. *Resuscitation* 2005;**66**:203–7. doi:10.1016/j.resuscitation.2005.02.011
- 23 Pine M, Jones B, Lou YB. Laboratory values improve predictions of hospital mortality. *Int J Qual Heal care J Int Soc Qual Heal Care* 1998;**10**:491–501.
- 24 Vroonhof K, van Solinge WW, Rovers MM, *et al.* Differences in mortality on the basis of laboratory parameters in an unselected population at the Emergency Department. *Clin Chem Lab Med* 2005;**43**:536–41. doi:10.1515/CCLM.2005.093
- 25 Hucker TR, Mitchell GP, Blake LD, *et al.* Identifying the sick: can biochemical measurements be used to aid decision making on presentation to the accident and emergency department. *Br J Anaesth* 2005;**94**:735–41. doi:10.1093/bja/aei122
- 26 Froom P, Shimoni Z. Prediction of Hospital Mortality Rates by Admission Laboratory Tests. *Clin Chem* 2005;**52**:325–8. doi:10.1373/clinchem.2005.059030
- 27 Asadollahi K, Hastings IM, Gill G V, *et al.* Prediction of hospital mortality from admission laboratory data and patient age: A simple model. *Emerg Med Australas* 2011;**23**:354–63. doi:10.1111/j.1742-6723.2011.01410.x
- 28 ten Boekel E, Vroonhof K, Huisman A, *et al.* Clinical laboratory findings associated with in-hospital mortality. *Clin Chim Acta* 2006;**372**:1–13. doi:10.1016/J.CCA.2006.03.024
- 29 Duckitt RW, Buxton-Thomas R, Walker J, *et al.* Worthing physiological scoring system: derivation and validation of a physiological early-warning system for medical admissions. An observational, population-based single-centre study†‡. *BJA Br J Anaesth* 2007;**98**:769–74. doi:10.1093/bja/aem097
- 30 Hodgetts TJ, Kenward G, Vlachonikolis IG, *et al.* The identification of risk factors for cardiac arrest and formulation of activation criteria to alert a medical emergency team. *Resuscitation* 2002;**54**:125–31.
- 31 Prytherch DR, Briggs JS, Weaver PC, *et al.* Measuring clinical performance using routinely collected clinical data. *Med Inform Internet Med* 2005;**30**:151–6. doi:10.1080/14639230500298966
- 32 Silke B, Kellett J, Rooney T, *et al.* An improved medical admissions risk system using multivariable fractional polynomial logistic regression modelling. *QJM* 2010;**103**:23–32. doi:10.1093/qjmed/hcp149

- 1  
2  
3 33 O’Sullivan E, Callely E, O’Riordan D, *et al.* Predicting outcomes in emergency medical  
4 admissions - role of laboratory data and co-morbidity. *Acute Med* 2012;**11**:59–65.  
5  
6 34 Mohammed M a., Rudge G, Watson D, *et al.* Index Blood Tests and National Early Warning  
7 Scores within 24 Hours of Emergency Admission Can Predict the Risk of In-Hospital Mortality:  
8 A Model Development and Validation Study. *PLoS One* 2013;**8**.  
9 doi:10.1371/journal.pone.0064340  
10  
11 35 Faisal M, Scally A, Richardson D, *et al.* Development and External Validation of an Automated  
12 Computer-Aided Risk Score for Predicting Sepsis in Emergency Medical Admissions Using the  
13 Patient’s First Electronically Recorded Vital Signs and Blood Test Results. *Crit Care Med*  
14 2018;;1. doi:10.1097/CCM.0000000000002967  
15  
16 36 Algorithm for detecting Acute Kidney Injury (AKI) based on serum creatinine changes with  
17 time <https://www.england.nhs.uk/wp-content/uploads/2014/06/psa-aki-alg.pdf>. 2014.  
18  
19 37 Silcock DJ, Corfield AR, Gowens PA, *et al.* Validation of the National Early Warning Score in  
20 the prehospital setting. *Resuscitation* 2015;**89**:31–5. doi:10.1016/j.resuscitation.2014.12.029  
21  
22 38 Escobar GJ, Dellinger RP. Early detection, prevention, and mitigation of critical illness outside  
23 intensive care settings. *J Hosp Med* 2016;**11**:S5–10. doi:10.1002/jhm.2653  
24  
25 39 Escobar GJ, Turk BJ, Ragins A, *et al.* Piloting electronic medical record-based early detection  
26 of inpatient deterioration in community hospitals. *J Hosp Med* 2016;**11**:S18–24.  
27 doi:10.1002/jhm.2652  
28  
29  
30  
31  
32  
33  
34  
35  
36  
37  
38  
39  
40  
41  
42  
43  
44  
45  
46  
47  
48  
49  
50  
51  
52  
53  
54  
55  
56  
57  
58  
59  
60



1  
2  
3  
4  
5  
6  
7  
8  
9  
10  
11  
12  
13  
14  
15  
16  
17  
18  
19  
20  
21  
22  
23  
24  
25  
26  
27  
28  
29  
30  
31  
32  
33  
34  
35  
36  
37  
38  
39  
40  
41  
42  
43  
44  
45  
46  
47  
48  
49  
50  
51  
52  
53  
54  
55  
56  
57  
58  
59  
60

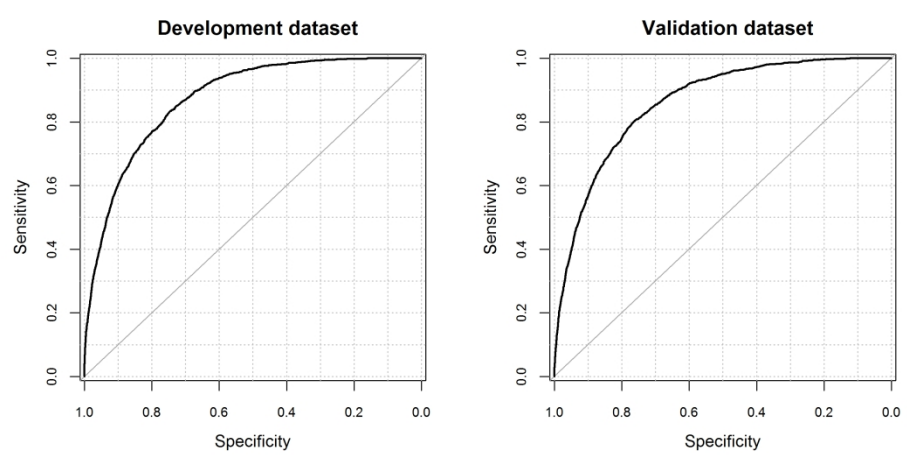

Area under the Receiver Operating Characteristic curve for development dataset (0.87) and validation dataset (0.86).

254x127mm (300 x 300 DPI)

## Supplementary Material

$$\begin{aligned}
 \text{Logit}(\text{Died}) = & -3.220 + 0.140 * \text{Male} + 0.077 * \text{Age} - 0.104 * \text{Albumin} + 9.883 \\
 & * (\text{Creatinine})^{-0.5} + 0.002 * \text{Haemoglobin} - 0.024 * \log(\text{Potassium}) \\
 & - 0.023 * \text{Sodium} + 1.167 * \log(\text{White Cell Count}) + 1.211 \\
 & * \log(\text{Urea}) + 0.131 * \text{AKI stage 1} + 0.443 * \text{AKI stage 2} - 0.388 \\
 & * \text{AKI stage 3} + 0.093 * \text{NEWS} + 0.569 * \log(\text{Respiration Rate}) \\
 & - 0.145 * \text{Temperature} - 0.919 * \log(\text{Systolic pressure}) + 0.777 \\
 & * \log(\text{Diastolic pressure}) + 0.511 * \log(\text{Pulse rate}) - 0.016 \\
 & * \text{Oxygen Saturations} + 0.606 * \text{Supplemental oxygen} + 0.716 * \text{Pain} \\
 & + 0.395 * \text{Voice} + 1.925 * \text{Unconscious} - 0.015 * \text{Age} \\
 & * \log(\text{White Cell Count}) + 1.481 * (\text{Creatinine})^{-0.5} \\
 & * \log(\text{White Cell Count}) + 15.551 * \text{AKI stage 3} * (\text{Creatinine})^{-0.5}
 \end{aligned}$$

We accounted for baseline difference in risk of death in the external validation data by adding 0.52 to the CARM logit model using an iterative procedure described elsewhere<sup>1</sup>

1. Faisal M, Howes R, Steyerberg EW, Richardson D, Mohammed MA. Using routine blood test results to predict the risk of death for emergency medical admissions to hospital: an external model validation study. *QJM* [Internet]. 2017 Jan 1 [cited 2017 Oct 2];110(1):27–31. Available from: <https://academic.oup.com/qjmed/article-lookup/doi/10.1093/qjmed/hcw110>

The NEWS [<https://www.rcplondon.ac.uk/projects/outputs/national-early-warning-score-news>] is based on a scoring system in which a score is allocated to vital signs physiological measurements already undertaken when patients present to, or are being monitored in hospital. Six physiological parameters form the basis of the scoring system:

| Physiological Parameters | 3     | 2        | 1           | 0           | 1           | 2         | 3                           |
|--------------------------|-------|----------|-------------|-------------|-------------|-----------|-----------------------------|
| Respiration Rate         | ≤8    |          | 9 - 11      | 12 - 20     |             | 21 - 24   | ≥25                         |
| Oxygen Saturations       | ≤91   | 92 - 93  | 94 - 95     | ≥96         |             |           |                             |
| Any Supplemental Oxygen  |       | Yes      |             | No          |             |           |                             |
| Temperature              | ≤35.0 |          | 35.1 - 36.0 | 36.1 - 38.0 | 38.1 - 39.0 | ≥39.1     |                             |
| Systolic BP              | ≤90   | 91 - 100 | 101 - 110   | 111 - 219   |             |           | ≥220                        |
| Heart Rate               | ≤40   |          | 41 - 50     | 51-90       | 91 - 110    | 111 - 130 | ≥131                        |
| Level of Consciousness   |       |          |             | Alert       |             |           | Voice, Pain, or Unconscious |

A score is allocated to each as they are measured, the magnitude of the score reflecting how extreme the parameter varies from the norm. This score is then aggregated, and uplifted for people requiring oxygen.

| Blood tests results recorded | Development dataset<br>N(%) | Validation dataset<br>N(%) |
|------------------------------|-----------------------------|----------------------------|
| within 24 hours              | 29255 (94.4)                | 24341 (92.7)               |
| within 48 hours              | 894 (2.9)                   | 1098 (4.2)                 |
| within 72 hours              | 512 (1.7)                   | 495 (1.9)                  |
| within 96 hours              | 335 (1.1)                   | 313 (1.2)                  |

**Table S1** Distribution of time to the first set of Blood test results recorded within 4 days for development and validation datasets.

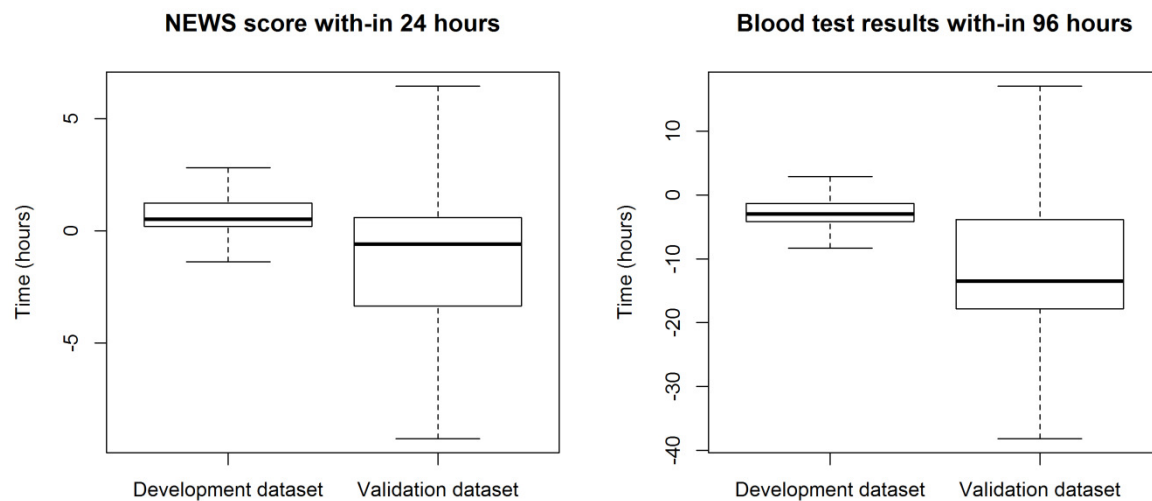

**Figure S1** Distribution of time to first NEWS score and Blood test results for development and validation datasets.

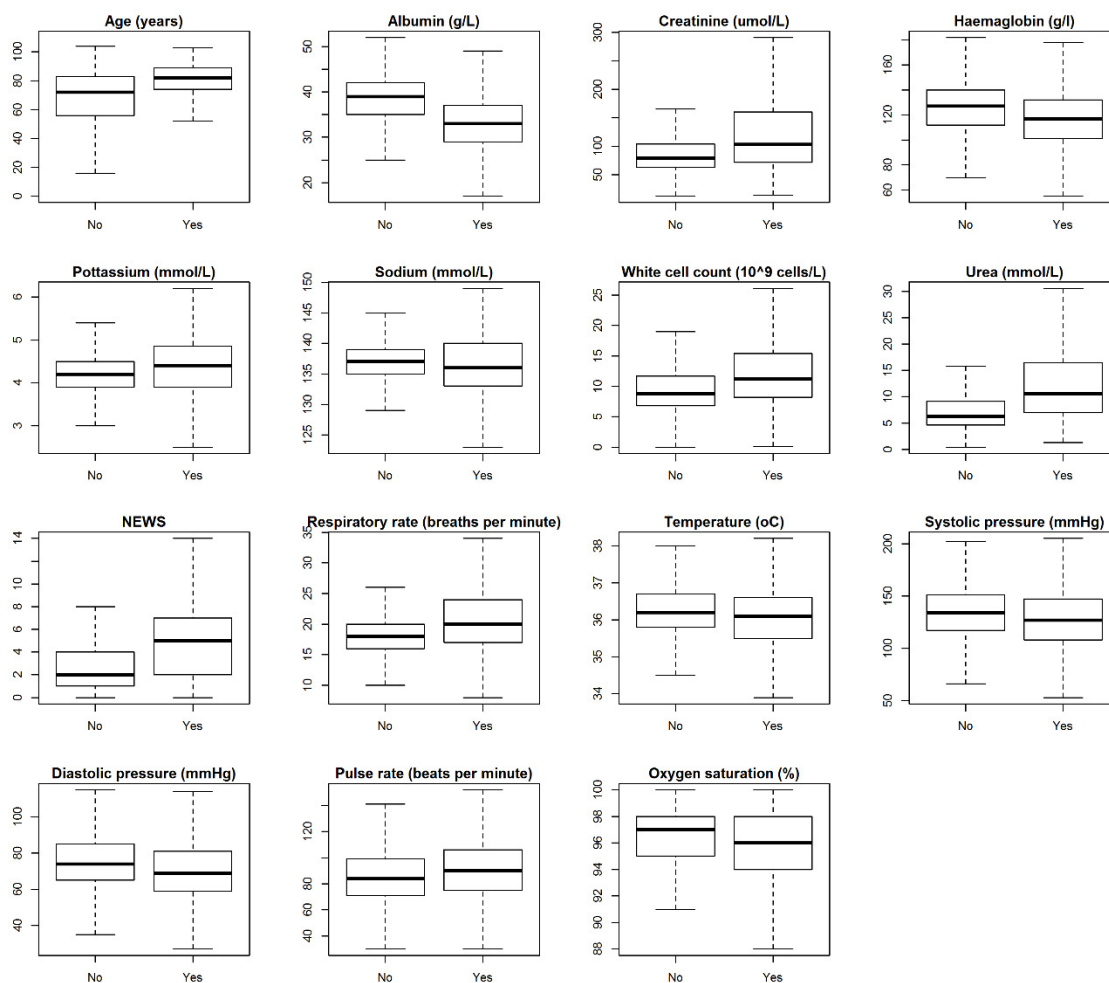

**Figure S2** Boxplot without outliers for continuous covariates with respect to patient's discharge status (Alive/Died) for NLAG hospitals

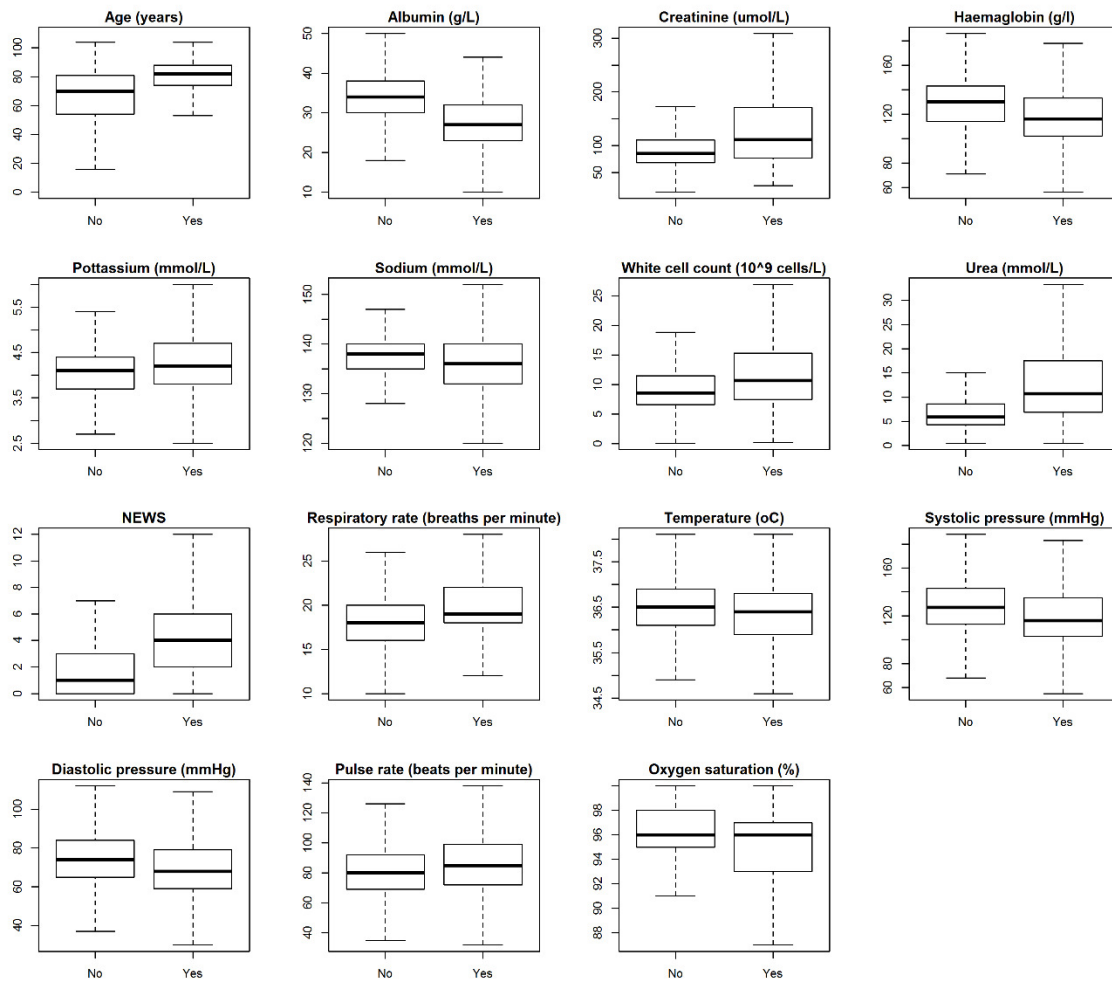

**Figure S3 Boxplot without outliers for continuous covariates with respect to patient's discharge status (Alive/Died) for York hospital**

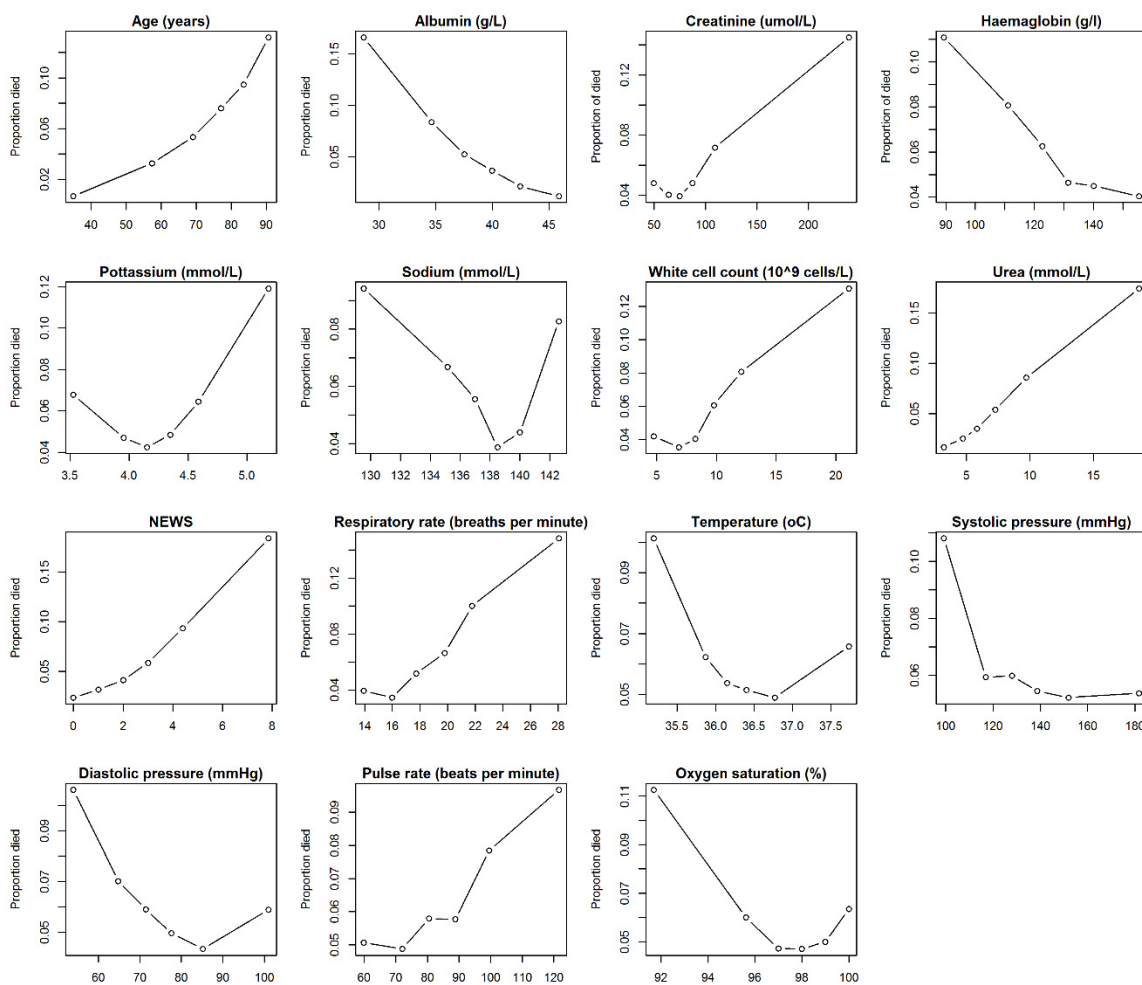

**Figure S4 Scatter plots showing the observed risk of death with continuous covariates for NLAG hospitals**

NB: y-axis range changes in each plot.

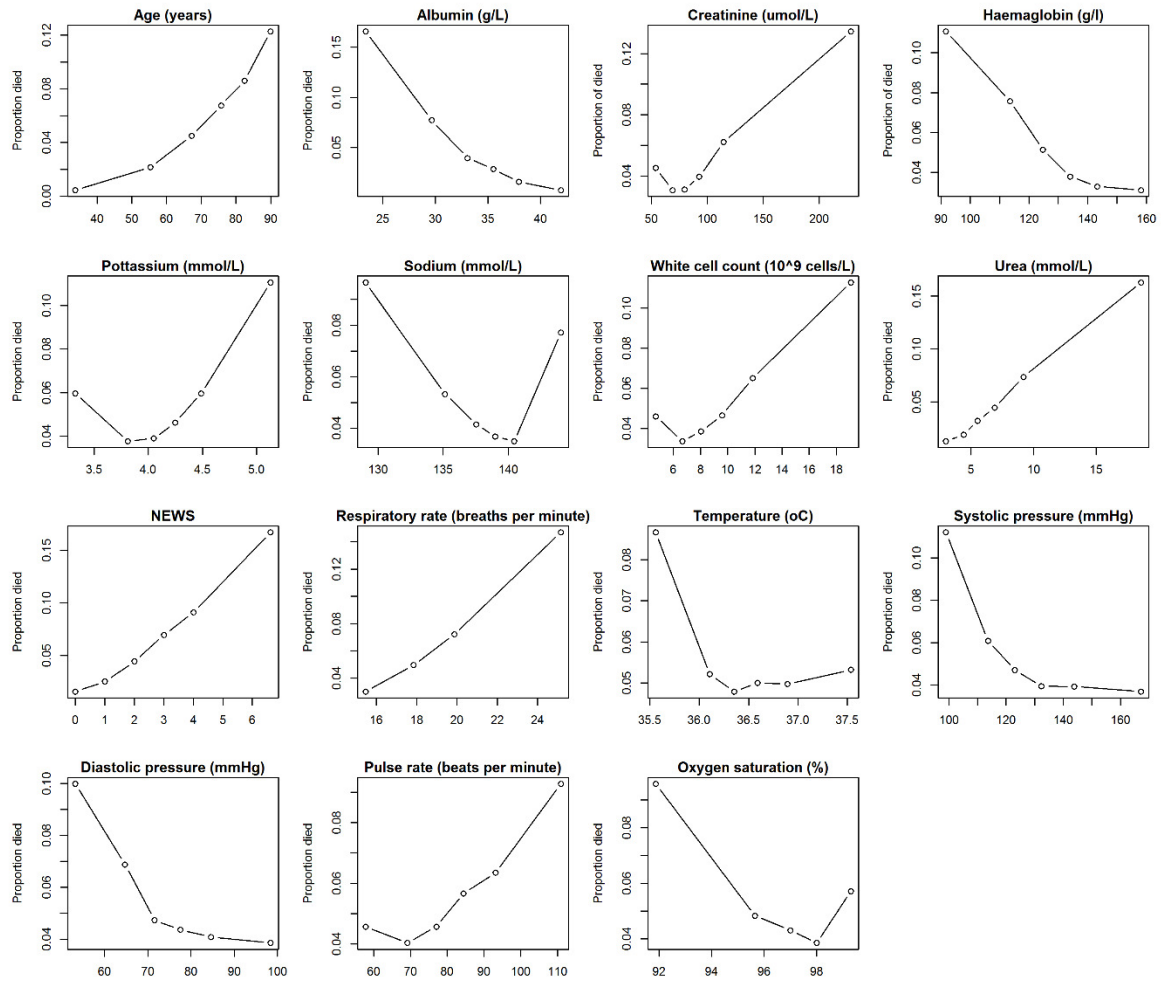

**Figure S5 Scatter plots showing the observed risk of death with continuous covariates for York hospital.**

NB: y-axis range changes in each plot.

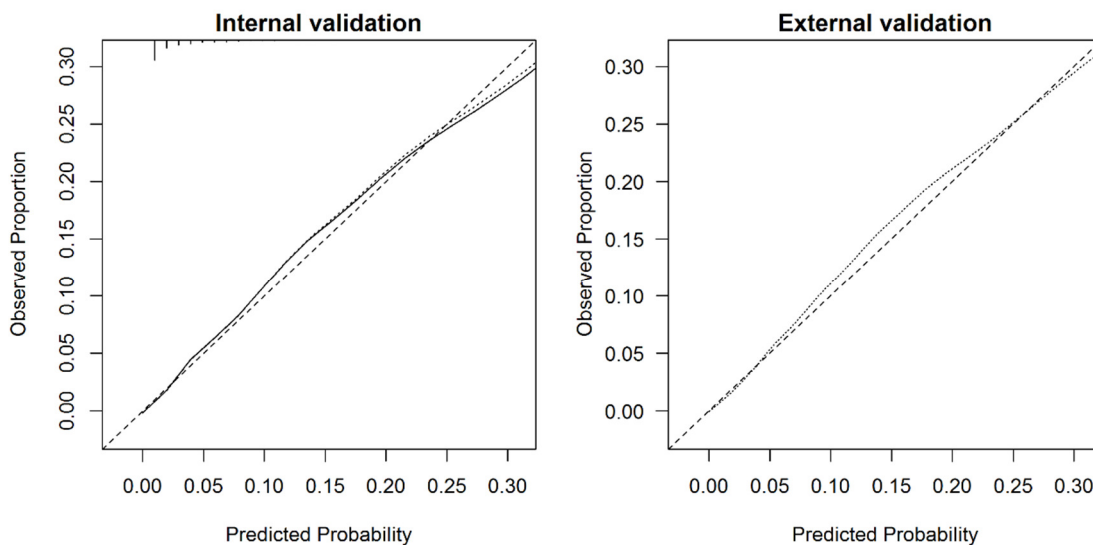

Figure S6 Internal and external validation sepsis model on development dataset and validation dataset.

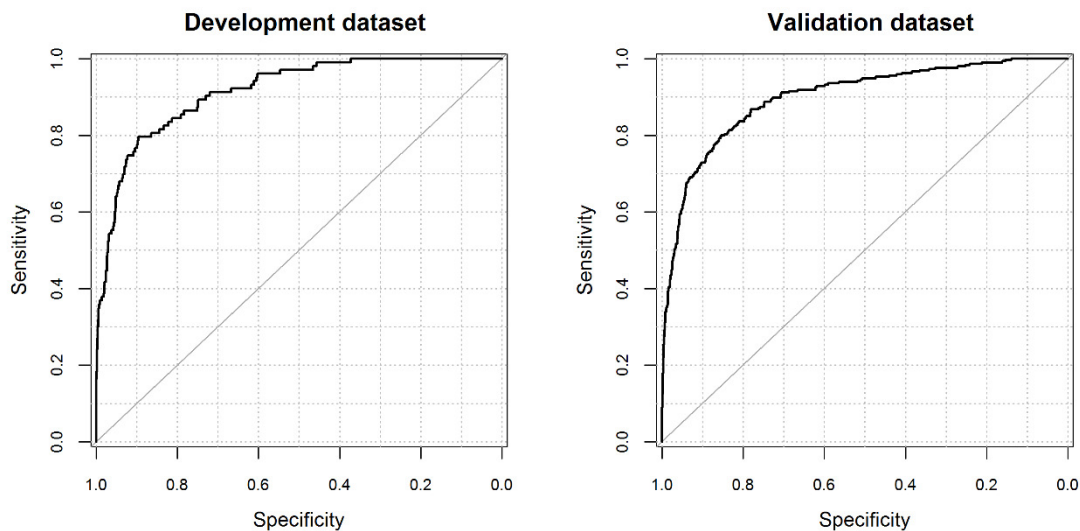

Figure S7 Receiver Operating Characteristic curve of (median) imputed blood tests results on development dataset and validation dataset.



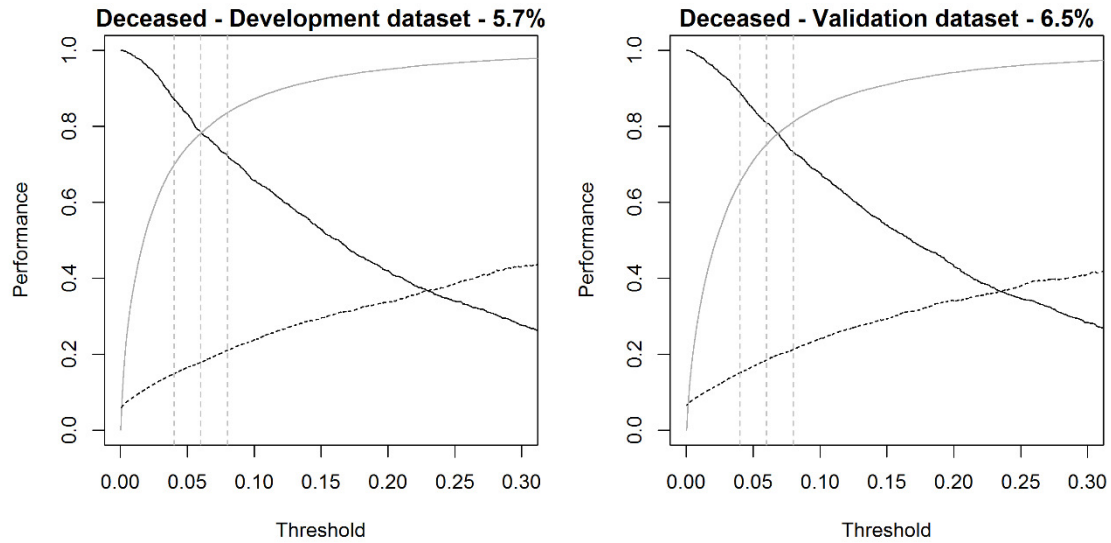

**Figure S8: Sensitivity analysis of CARM model at various thresholds (0.0, 0.01, ..., 0.30) on development dataset and validation dataset.**

Black solid line is for sensitivity and black dashed line is for positive predictive value (PPV). Grey solid line is specificity and grey dashed vertical lines are at thresholds (0.04, 0.06, and 0.08).

# BMJ Open

**Development and validation of a novel computer-aided score to predict the risk of in-hospital mortality for acutely ill medical admissions in two acute hospitals using their first electronically recorded blood test results and vital signs: a cross-sectional study**

|                                 |                                                                                                                                                                                                                                                                                                                                                                                                                                                                                                                                                                                                                                                                                                                                                                                                                                                                                                                                                      |
|---------------------------------|------------------------------------------------------------------------------------------------------------------------------------------------------------------------------------------------------------------------------------------------------------------------------------------------------------------------------------------------------------------------------------------------------------------------------------------------------------------------------------------------------------------------------------------------------------------------------------------------------------------------------------------------------------------------------------------------------------------------------------------------------------------------------------------------------------------------------------------------------------------------------------------------------------------------------------------------------|
| Journal:                        | <i>BMJ Open</i>                                                                                                                                                                                                                                                                                                                                                                                                                                                                                                                                                                                                                                                                                                                                                                                                                                                                                                                                      |
| Manuscript ID                   | bmjopen-2018-022939.R1                                                                                                                                                                                                                                                                                                                                                                                                                                                                                                                                                                                                                                                                                                                                                                                                                                                                                                                               |
| Article Type:                   | Research                                                                                                                                                                                                                                                                                                                                                                                                                                                                                                                                                                                                                                                                                                                                                                                                                                                                                                                                             |
| Date Submitted by the Author:   | 03-Jul-2018                                                                                                                                                                                                                                                                                                                                                                                                                                                                                                                                                                                                                                                                                                                                                                                                                                                                                                                                          |
| Complete List of Authors:       | Faisal, Muhammad; University of Bradford; Bradford Institute for Health Research<br>Scally, Andrew ; University of Bradford, Faculty of Health Studies<br>Jackson, Natalie; Bradford Institute for Health Research<br>Richardson, Donald; York Teaching Hospital NHS Foundation Trust<br>Beatson, Kevin; York Teaching Hospital NHS Foundation Trust<br>Howes, Robin; Northern Lincolnshire and Goole Hospitals NHS Foundation Trust<br>Speed, Kevin; Northern Lincolnshire and Goole Hospitals NHS Foundation Trust<br>Menon, Madhav; Northern Lincolnshire and Goole Hospitals NHS Foundation Trust<br>Daws, Jeremy; Northern Lincolnshire and Goole Hospitals NHS Foundation Trust<br>Dyson, Judith; University of Hull, Department of Community Health and Social Care<br>Marsh, Claire; Bradford Institute for Health Research<br>Mohammed, Mohammed ; University of Bradford Faculty of Health Studies; Bradford Institute for Health Research |
| <b>Primary Subject Heading</b>: | Health services research                                                                                                                                                                                                                                                                                                                                                                                                                                                                                                                                                                                                                                                                                                                                                                                                                                                                                                                             |
| Secondary Subject Heading:      | Health informatics                                                                                                                                                                                                                                                                                                                                                                                                                                                                                                                                                                                                                                                                                                                                                                                                                                                                                                                                   |
| Keywords:                       | computer aided risk score, hospital mortality, vital signs and blood test, national early warning score, emergency admission                                                                                                                                                                                                                                                                                                                                                                                                                                                                                                                                                                                                                                                                                                                                                                                                                         |
|                                 |                                                                                                                                                                                                                                                                                                                                                                                                                                                                                                                                                                                                                                                                                                                                                                                                                                                                                                                                                      |

SCHOLARONE™  
Manuscripts

1  
2  
3  
4  
5  
6  
7  
8  
9  
10  
11  
12  
13  
14  
15  
16  
17  
18  
19  
20  
21  
22  
23  
24  
25  
26  
27  
28  
29  
30  
31  
32  
33  
34  
35  
36  
37  
38  
39  
40  
41  
42  
43  
44  
45  
46  
47  
48  
49  
50  
51  
52  
53  
54  
55  
56  
57  
58  
59  
60

# Development and validation of a novel computer-aided score to predict the risk of in-hospital mortality for acutely ill medical admissions in two acute hospitals using their first electronically recorded blood test results and vital signs: a cross-sectional study

## Authors

Muhammad Faisal

*Senior Research Fellow in Medical Statistics*

Faculty of Health Studies, University of Bradford, Bradford, UK

Bradford Institute for Health Research

E-mail: [M.Faisal1@bradford.ac.uk](mailto:M.Faisal1@bradford.ac.uk)

Andrew J Scally

*Medical Statistician*

Faculty of Health Studies, University of Bradford, Bradford, UK

Bradford Institute for Health Research

E-mail: [A.J.Scally@bradford.ac.uk](mailto:A.J.Scally@bradford.ac.uk)

Natalie Jackson

*Health Informatics Senior Project Manager*

Improvement Academy, Bradford Institute for Health Research

E-mail: [Natalie.jackson@yhahsn.nhs.uk](mailto:Natalie.jackson@yhahsn.nhs.uk)

Donald Richardson

*Consultant Renal Physician*

Department of Renal Medicine, York Teaching Hospital NHS Foundation Trust Hospital

E-mail: [drichardson@doctors.org.uk](mailto:drichardson@doctors.org.uk)

Kevin Beatson

*Development Manager*

York Teaching Hospital NHS Foundation Trust

E-mail: [Kevin.Beatson@York.NHS.uk](mailto:Kevin.Beatson@York.NHS.uk)

Robin Howes

*Operational Manager for Electronic Patient Records*

Department of Strategy & Planning

Northern Lincolnshire and Goole Hospitals

E-mail: [robin.howes@nhs.net](mailto:robin.howes@nhs.net)

Kevin Speed

*Consultant Haematologist*

Northern Lincolnshire and Goole Hospitals

E-mail: [kevin.speed@nhs.net](mailto:kevin.speed@nhs.net)

Madhav Menon

*Consultant in respiratory medicine*

Northern Lincolnshire and Goole Hospitals

1  
2  
3 E-mail: [madhav.menon1@nhs.net](mailto:madhav.menon1@nhs.net)  
4

5 Jeremy Daws

6 *Head of Quality Assurance*

7 Northern Lincolnshire and Goole Hospitals

8 E-mail: [Jeremy.daws@nhs.net](mailto:Jeremy.daws@nhs.net)  
9

10 Judith Dyson

11 *Senior Lecturer Mental Health*

12 University Of Hull

13 E-mail: [J.Dyson@hull.ac.uk](mailto:J.Dyson@hull.ac.uk)  
14

15 Claire Marsh

16 *Senior Research Fellow/ Patient & Public Engagement Lead*

17 Improvement Academy, Bradford Institute for Health Research

18 E-mail: [claire.marsh@bthft.nhs.uk](mailto:claire.marsh@bthft.nhs.uk)  
19

20 Mohammed A Mohammed

21 *Professor of Healthcare Quality & Effectiveness*

22 Faculty of Health Studies, University of Bradford, Bradford, UK

23 Deputy Director of the Bradford Institute for Health Research

24 Academic Director to the Yorkshire & Humber Academic Health Sciences Network

25 E-mail: [M.A.Mohammed5@Bradford.ac.uk](mailto:M.A.Mohammed5@Bradford.ac.uk)  
26

27  
28 Corresponding author: Mohammed A Mohammed [M.A.Mohammed5@Bradford.ac.uk](mailto:M.A.Mohammed5@Bradford.ac.uk)  
29  
30  
31  
32  
33  
34  
35  
36  
37  
38  
39  
40  
41  
42  
43  
44  
45  
46  
47  
48  
49  
50  
51  
52  
53  
54  
55  
56  
57  
58  
59  
60

## Abstract

**Objectives:** There are no established mortality risk equations specifically for emergency medical patients who are admitted to a general hospital ward. Such risk equations may be useful in supporting the clinical decision making process. We aim to develop and externally validate a computer-aided risk of mortality (CARM) score by combining the first electronically recorded vital signs and blood test results for emergency medical admissions.

**Design:** Logistic regression model development and external validation study.

**Setting:** Two acute hospitals (NH – model development data; YH – external validation data).

**Participants:** Adult ( $\geq 16$  years) medical admissions discharged over a 24 month period with electronic NEWS and blood test results recorded on admission.

**Results:** The risk of in-hospital mortality following emergency medical admission was 5.7% (NH: 1766/30996) and 6.5% (YH: 1703/26247). The c-statistic for the CARM score in NH was 0.87 (95% CI 0.86 to 0.88) and was similar in an external hospital setting YH (0.86, 95% CI 0.85 to 0.87) and the calibration slope included 1 (0.97, 95% CI 0.94 to 1.00).

**Conclusions:** We have developed a novel, externally validated CARM score with good performance characteristics for estimating the risk of in-hospital mortality following an emergency medical admission using the patient's first, electronically recorded, vital signs and blood tests results. Since the CARM score places no additional data collection burden on clinicians and is readily automated, it may now be carefully introduced and evaluated in hospitals with sufficient informatics infrastructure.

**Key words:** computer aided risk score, hospital mortality, vital signs and blood test, national early warning score, emergency admission

**Article Summary**

- This study provides a novel computer-aided risk of mortality (CARM) score by combining the first electronically recorded vital signs and blood test results for emergency medical admissions.
- CARM is externally validated and places no additional data collection burden on clinicians and is readily automated.
- About 20-30% of admissions do not have both NEWS and blood test results and so CARM is not applicable to these admissions.

For peer review only

## Introduction

Unplanned or emergency medical admissions to hospital involve patients with a broad spectrum disease and illness severity [1]. The appropriate early assessment and management of such admissions can be a critical factor in ensuring high quality care [2]. A number of scoring systems have been developed which may support this clinical decision making process but few have been externally validated [1]. We propose to develop a computer aided risk of in-hospital mortality score, following emergency medical admission that automatically combines two routinely collected, electronically recorded, clinical data sets – vital signs and blood test results. There is some evidence to suggest that the results of routinely undertaken blood tests and/or vital signs data may be useful in predicting the risk of death [1].

In the United Kingdom (UK) National Health Service (NHS), the patient's vital signs are monitored and summarised into a National Early Warning Score(s) (NEWS) that is mandated by the Royal College of Physicians (London) [3]. NEWS is derived from seven physiological variables or vital signs – respiration rate, oxygen saturations, any supplemental oxygen, temperature, systolic blood pressure, heart rate and level of consciousness (Alert, Voice, Pain, Unresponsive) – which are routinely collected by nursing staff as an integral part of the process of care, usually for all patients, and then repeated thereafter depending on local hospital protocols [3]. The use of NEWS is relevant because “Patients die not from their disease but from the disordered physiology caused by the disease” [4]. NEWS points are allocated according to basic clinical observations and the higher the NEWS the more likely it is that the patient is developing a critical illness (see appendix for further details of the NEWS). The clinical rationale for NEWS is that early recognition of deterioration in the vital signs of a patient can provide opportunities for earlier, more effective intervention. Furthermore, studies have shown that electronically collected NEWS are highly reliable and accurate when compared with paper based methods [5–8].

1  
2  
3 Blood tests are an integral part of clinical medicine, and are routinely undertaken during a patient's  
4 stay in hospital. Typically, routine blood tests consist of a core list of seven biochemical and  
5 haematological tests, (albumin, creatinine, potassium, sodium, urea, haemoglobin, white blood cell  
6 count) and, in the absence of contraindications and subject to patient consent, almost all patients  
7 admitted to hospital undergo these tests on admission. Furthermore, in the UK National Health  
8 Service (NHS) creatinine blood test results are now used to identify patients at risk of Acute Kidney  
9 Injury (AKI) [9] which is an important cause of avoidable patient harm [10].

10  
11  
12  
13  
14  
15  
16  
17  
18 In this paper, we investigate the extent to which the vital signs and blood test results of acutely ill  
19 patients can be used to predict the risk of in-hospital mortality following emergency admission to  
20 hospital. Our aim is to develop and validate an automated, Computer Aided Risk of Mortality (CARM)  
21 model, using the patient's first, electronically recorded, vital signs and blood test results which are  
22 usually available within a few hours of emergency admission without requiring any additional data  
23 items or prompts from clinicians. CARM, therefore, is designed for use in hospitals with sufficient  
24 informatics infrastructure.

## 32 33 34 Methods

### 35 36 Setting & data

37  
38  
39 Our cohorts of emergency medical admissions are from three acute hospitals which are  
40 approximately 100 kilometres apart in the Yorkshire & Humberside region of England – the Diana,  
41 Princess of Wales Hospital (n~400 beds) and Scunthorpe General Hospital (n~400 beds) managed by  
42 the Northern Lincolnshire and Goole NHS Foundation Trust (NLAG), and York Hospital (YH) (n~700  
43 beds) (managed by York Teaching Hospitals NHS Foundation Trust). The data from the two acute  
44 hospitals from NLAG are combined because this reflects how the hospitals are managed and are  
45 referred to as NLAG Hospitals (NH), which essentially places our study in two acute hospitals. Our  
46 study hospitals (NH, YH respectively) have been exclusively using electronic NEWS scoring since at  
47 least 2013 as part of their in-house electronic patient record systems. We chose these hospitals



1  
2  
3 because they had electronic NEWS which are collected as part of the patient's process of care and  
4  
5 were agreeable to the study. We did not approach any other hospital.  
6

7  
8 We considered all adult (age $\geq$ 16 years) emergency medical admissions, discharged during a 24-  
9  
10 month period (1 January 2014 to 31 December 2015), with blood test results and NEWS. For each  
11  
12 admission, we obtained a pseudonymised patient identifier, the patient's age (years), sex  
13  
14 (male/female), discharge status (alive/dead), admission and discharge date and time, and electronic  
15  
16 NEWS. The NEWS ranged from 0 (indicating the lowest severity of illness) to 19 (the maximum  
17  
18 NEWS value possible is 20). The admission/discharge date and electronically recorded NEWS are  
19  
20 date and time stamped and the index NEWS was defined as the first electronically recorded score  
21  
22 within  $\pm$ 24 hours of the admission time. The first blood test results were defined as the first full set  
23  
24 of blood tests results recorded within 4 days (96 hours) of admission (>90% of blood test results  
25  
26 were within  $\pm$ 24 hours of admission - see table S1 in appendix).  
27

28  
29 For model development purposes, we were unable to consider emergency admissions without  
30  
31 complete blood test results and NEWS recorded – this constituted 16.5% (6104/37100) of records in  
32  
33 NH and 28.6% (10504/36751) of records in YH. We excluded records for the following reasons: (1)  
34  
35 Records where the first NEWS was after 24 hours of admission and/or (2) where the first blood test  
36  
37 was after 4 days of admission because these “delayed” data were considered less likely to reflect the  
38  
39 sickness profile of patients on admission. Moreover, the time from admission to first blood test  
40  
41 results was usually several hours earlier than the actual time of admission because blood tests can  
42  
43 be ordered in the emergency department before formal admission (see figure S1 in appendix).  
44  
45  
46  
47  
48

## 49 Development of a Computer Aided Risk of Mortality (CARM) Score

50  
51 We began with exploratory analyses including line plots and box plots that showed the relationship  
52  
53 between covariates and risk of in-hospital death in our hospitals. We developed a logistic regression  
54  
55 model, known as CARM, to predict the risk of in-hospital death with the following covariates: Age  
56  
57  
58  
59

1  
2  
3 (years), Sex (Male/Female), NEWS (including its components, plus diastolic blood pressure, as  
4 separate covariates), blood test results (albumin, creatinine, haemoglobin, potassium, sodium, urea,  
5 and white cell count), and Acute Kidney Injury (AKI) score. The primary rationale for using these  
6 variables is that they are routinely collected as part of process of care and their inclusion in our  
7 statistical models is on clinical grounds as opposed to the statistical significance of any given  
8 covariate. The widespread use of these variables in routine clinical care means that our model is  
9 more likely to be generalisable to other settings.  
10

11  
12 We used the *qladder* function (*Stata* [11]), which displays the quantiles of transformed variable  
13 against the quantiles of a normal distribution according to the ladder powers  
14 ( $x^3, x^2, x^1, x, \sqrt{x}, \log(x), x^{-1}, x^{-2}, x^{-3}$ ) for each variable continuous covariate and chose the  
15 following transformations:- (creatinine)<sup>-1/2</sup>, log<sub>e</sub>(potassium), log<sub>e</sub>(white cell count), log<sub>e</sub>(urea), log<sub>e</sub>  
16 (respiratory rate), log<sub>e</sub>(pulse rate), log<sub>e</sub>(systolic blood pressure), and log<sub>e</sub>(diastolic blood pressure). We  
17 used an automated approach to search for all two-way interactions and incorporated those  
18 interactions which were statistically significant (p<0.001) implemented in the MASS library [12] in R  
19 [13].  
20

21  
22 We developed the CARM model to predict the risk of in-hospital mortality following emergency  
23 medical admission using data from NH (the development dataset) and we externally validated this  
24 model, reporting discrimination and calibration characteristics [14], using data from another hospital  
25 (YH) (the external validation dataset). The data from YH is not used for model development but as an  
26 external validation dataset only. We internally validated the CARM using a bootstrapping method  
27 that is implemented in the *rms* library [15] in R to estimate statistical optimism [14,15].  
28

29  
30 Discrimination relates to how well a model can separate, (or discriminate between), those who died  
31 and those who did not. Calibration measures a model's ability to generate predictions that are on  
32 average close to the average observed outcome. Overall statistical performance was assessed using  
33 the scaled Brier score which incorporates both discrimination and calibration [14]. The Brier score is  
34  
35  
36  
37  
38  
39  
40  
41  
42  
43  
44  
45  
46  
47  
48  
49  
50  
51  
52  
53  
54  
55  
56  
57  
58  
59  
60

1  
2  
3 the squared difference between actual outcomes and predicted risk of death, scaled by the  
4  
5 maximum Brier score such that the scaled Brier score ranges from 0–100%. Interpretation of the  
6  
7 scaled Brier score is similar to  $R^2$ . Higher values indicate superior models. Calibration is the  
8  
9 relationship between the observed and predicted risk of death and can be readily seen on a scatter  
10  
11 plot (y-axis observed risk, x-axis predicted risk). Perfect predictions should be on the 45° line. The  
12  
13 intercept (a) and slope (b) of this line gives an assessment of ‘calibration-in-the-large’ [16]. At model  
14  
15 development,  $a=0$  and  $b=1$ , but at validation, calibration-in-the-large problems are indicated if a is  
16  
17 not 0 and if b is more/less than 1 as this reflects problems of under/over prediction [17].  
18  
19

20 The concordance statistic (c-statistic) is a commonly used measure of discrimination. For a binary  
21  
22 outcome, the c-statistic is the area under the Receiver Operating Characteristics (ROC) curve. The  
23  
24 ROC curve is a plot of the sensitivity, (true positive rate), versus 1-specificity, (false positive rate), for  
25  
26 consecutive predicted risks [14]. The area under the ROC curve is interpreted as the probability that  
27  
28 a deceased patient has a higher predicted risk of death than a randomly chosen non-deceased  
29  
30 patient. A c-statistic of 0.5 is no better than tossing a coin, whilst a perfect model has a c-statistic of  
31  
32 1. The higher the c-statistic, the better the model. In general, values less than 0.7 are considered to  
33  
34 show poor discrimination, values of 0.7–0.8 can be described as reasonable, and values above 0.8  
35  
36 suggest good discrimination [18]. The 95% confidence interval for the c-statistic was derived using  
37  
38 DeLong’s method as implemented in the *pROC* library [19] in *R* [13]. Box plots showing the risk of  
39  
40 death for those discharged alive and dead are a simple way to visualise the discrimination of each  
41  
42 model. The difference in the mean predicted risk of death for those who were discharged alive and  
43  
44 dead is a measure of the discrimination slope. The higher the slope, the better the discrimination  
45  
46 [14]. We followed the TRIPOD guidelines for model development and validation [20]. All analyses  
47  
48 were carried using *R* [13] and *Stata* [11].  
49  
50  
51  
52  
53  
54  
55  
56  
57  
58  
59  
60

## Ethical approval

This study received ethical approval from The Yorkshire & Humberside Leeds West Research Ethics Committee on 17 September 2015 (ref. 173753), with NHS management permissions received January 2016.

## Patient and Public Involvement

A workshop with a patient and service user group, linked to the University of Bradford, was involved at the start of this project to co-design the agenda for the patient and staff focus groups which were subsequently held at each hospital site. Patients were invited to attend the patient focus group through existing patient and public involvement groups. The criteria used for recruitment to these focus group was any member of the public who had been a patient or carer in the last five years. The patient and public voice continued to be included throughout the project with three patient representatives invited to sit on the project steering group. Participants will be informed of the results of this study through the patient and public involvement leads at each hospital site and the project team have met with the Bradford Patient and service user group to discuss the results.

## Data Sharing Statement

Our data sharing agreement with the two hospitals (York hospital & NLAG hospital) does not permit us to share this data with other parties. Nonetheless if anyone is interested in the data, then they should contact the R&D offices at each hospital in the first instance.

## Results

### Cohort description

We considered emergency medical admissions in each hospital (NH:n=37100, YH:n=36751) over the 24-month period. Of these 16.5% (6104/37100) in NH and 28.6% (10504/36751) in YH were not eligible for our study because they did not have NEWS recorded within  $\pm 24$  hours of admission

1  
2  
3 and/or full complement of blood test results within  $\pm 96$  hours of admission (see Table 1, Table S1  
4 and Figure S1). At YH, 24.2% of records were excluded because no or incomplete blood test results  
5 were recorded compared with only 10% in NH. Exclusions due to lack of NEWS data were less  
6 marked between YH and NH (see Table S2 in appendix for characteristic of emergency admissions  
7 with incomplete data).  
8  
9

10  
11  
12  
13 The in-hospital mortality was 5.7% (1766/30996) in NH and 6.5% (1703/26247) in YH. The age, sex,  
14 NEWS and blood test results profile is shown Table 2. Admissions in YH were older, with higher  
15 NEWS, higher AKI scores (AKI stage 3 is more common than stage 2 in YH) but higher albumin blood  
16 test results than NH. YH has a renal unit whereas NH does not.  
17  
18  
19

20  
21  
22 Figures S2 to S5 (see appendix) show box plots and line plots for each continuous (untransformed)  
23 covariate that was included in the CARM model for NH and YH respectively. The box plots (figures S2  
24 & S3 in appendix) show a similar pattern in each hospital. Compared with patients discharged alive,  
25 the deceased patients were aged older, with lower albumin, haemoglobin and sodium values, and  
26 higher creatinine, potassium, white cell count and urea values. NEWS was higher in deceased  
27 patients compared with patients discharged alive, as respiratory rate and pulse rate were higher in  
28 deceased patients. However, the temperature, blood pressure and oxygen saturation were lower in  
29 deceased patients. The line plots in the appendix (figures S4 & S5 in appendix) show that the  
30 relationship between a given continuous covariate and the risk of death is similar in each hospital.  
31  
32  
33  
34  
35  
36  
37  
38  
39  
40

## 41 42 Statistical Modelling of CARM 43 44

45 We assessed the performance of the CARM model to predict the risk of in-hospital mortality. The  
46 model coefficients in logit scale with examples are shown in the appendix (see Table S3). Table 3  
47 shows the performance of the model in the development and validation dataset. Figure 1 shows the  
48 ROC plots of CARM in the development and validation datasets (see Figure S6 in the appendix for  
49 ROC plots comparing CARM versus NEWS). The c-statistic was high in the development dataset 0.87  
50 [95% CI 0.86 - 0.88] and the external validation dataset 0.86 [95% CI 0.85 - 0.87]. Likewise, the  
51  
52  
53  
54  
55  
56  
57  
58  
59  
60

1  
2  
3 scaled Brier score and discrimination were similar in the development and external validation  
4 datasets. The calibration slope is 0.97 (95%CI 0.94 to 1.00), which is good (see appendix Figure S7).  
5  
6  
7 The final CARM model, which is not intended for paper-based use, is shown in the appendix with  
8  
9 accompanying internal and external validation plots (see appendix figure S7).  
10

11  
12 We excluded 10.0% (NH) and 24.2% (YH) of emergency admissions from the development and  
13  
14 validation dataset respectively, because they had no or incomplete set of blood test results  
15  
16 reported. We examined the performance of the CARM model in these excluded records by first  
17  
18 imputing age and sex specific median blood test results, and then applying the CARM model to these  
19  
20 admissions only. The last column in Table 3 shows the subsequent c-statistics in these imputed  
21  
22 records only. The c-statistics for these imputed records were not markedly different in the  
23  
24 development and validation dataset (see Figure S8 appendix for corresponding ROC plots).  
25

26  
27 Table 4 shows the sensitivity, specificity and positive & negative predictive values along with  
28  
29 likelihood ratio (LR+/LR-) for a selected range of cut-off values for the risk of dying, which tentatively  
30  
31 suggests that a threshold risk of 8% provides a reasonable balance between sensitivity (around 70%)  
32  
33 and specificity (more than 80% in development and validation datasets – see table 4 and figure S9 in  
34  
35 appendix).  
36

## 37 38 39 Discussion

40  
41 We have shown that it is feasible to use the first electronically-recorded vital signs and blood test  
42  
43 results of an emergency medical patient to predict the risk of in-hospital mortality following  
44  
45 emergency medical admission. We developed our CARM model in one hospital and externally  
46  
47 validated in data from another hospital. We found that CARM has good performance and our  
48  
49 findings tentatively suggest that a cut-off of 8% predicted risk of in-hospital mortality death appears  
50  
51 to strike a reasonable balance between sensitivity and specificity.  
52

53  
54 Whilst several previous studies [1] have used blood test results [21–28] or patient physiology [29,30]  
55  
56 to predict the risk of in-hospital mortality, few studies have combined these two data sources [31–  
57

1  
2  
3 34] and even fewer reported external validation [1]. Our study is based on data from two different  
4 hospitals with material differences in recording of blood test results but still yielding similar  
5 performance of CARM. This suggests that our approach, which merits further study, may be  
6 generalisable to other UK NHS hospitals with electronically-recorded blood test results and NEWS –  
7 especially as the use of NEWS in the UK NHS is mandated and that our approach does not rely on  
8 reference ranges from blood tests which can vary between hospitals. Indeed, a recent paper with  
9 sepsis as the outcome variable also showed promising results by combining the first blood test  
10 results and NEWS [35].  
11  
12  
13  
14  
15  
16  
17  
18  
19

20  
21 There are a number of limitations in our study. There appears to be a systematic difference in the  
22 prevalence of oxygen supplementation in the development and validation datasets, which may  
23 warrant further investigation. However, the prevalence ratios (dead/alive) are similar in both groups  
24 (2.77 and 3.29 for NH and YH, respectively) and therefore this should have no significant detrimental  
25 effect on the validity of our model. Although we focused on in-hospital mortality (because we aimed  
26 to aid clinical decision making in the hospital), the impact of this selection bias needs to be assessed  
27 by capturing out-of-hospital mortality by linking death certification data and hospital data. CARM,  
28 like other risk scores, can only be an aid to the decision-making process of clinical teams [1,18] and  
29 its usefulness in clinical practice remains to be seen. We found that up to about ¼ of emergency  
30 medical admissions had no (or an incomplete set of) recorded blood test results for whom we tested  
31 a simple median imputation strategy without knowing why such data was missing. We found that  
32 the performance of CARM did not materially deteriorate in these admissions. We do not suggest  
33 that our imputation method is an optimal imputation strategy. Rather we offer it as a simple,  
34 pragmatic, preliminary imputation strategy, which is akin to the AKI detection algorithm which also  
35 imputes the median creatinine value where required [36]. Further work on how to optimally address  
36 the issue of missing data is required. We did not undertake an imputation exercise for patients with  
37 no recorded NEWS because they constituted a much smaller proportion of missing data (<5%), and  
38  
39  
40  
41  
42  
43  
44  
45  
46  
47  
48  
49  
50  
51  
52  
53  
54  
55  
56  
57  
58  
59  
60

1  
2  
3 NEWS is not recommended in patients requiring immediate resuscitation, direct admission to  
4 intensive care, and patients with end-stage renal failure or with acute intracranial conditions [37].  
5  
6 We have used the first set of electronically recorded vital signs and blood test results to develop  
7  
8 CARM, but updating CARM scores in real-time when new data becomes available is likely to be  
9  
10 important to clinical teams and so warrants further study. Finally, our external validation was  
11  
12 undertaken by the same research team in a similar context of the NHS. Further external validation by  
13  
14 different research teams in different settings would be useful.  
15  
16

17  
18 We have designed CARM to be used in hospitals with sufficient informatics infrastructure (eg  
19  
20 electronic health records) [38,39]. CARM is not targeting specific emergency medical patients only.  
21  
22 Rather, we are seeking to raise situational awareness of the risk of death in-hospital as early as  
23  
24 possible, without requiring any additional data items or prompts from clinicians. Whilst we have  
25  
26 demonstrated that CARM has potential, we have yet to test its use in routine clinical practice. This is  
27  
28 important because we need to demonstrate that CARM does more “good” than “harm” in practice  
29  
30 [38,39]. For example, whilst routine blood tests are not indicated in a considerable number of  
31  
32 emergency medical admissions, it is nevertheless possible that for a given patient, some clinicians  
33  
34 (eg less experienced) may be tempted to order routine blood tests so that they can obtain a CARM  
35  
36 score to support their clinical decision-making process. So, the next phase of this work is to field test  
37  
38 CARM by carefully engineering it into routine clinical practice to see if it does enhance the quality of  
39  
40 care for acutely ill patients, whilst noting any unintended consequences.  
41  
42  
43  
44

## 45 Conclusion

46  
47 We have developed a novel, externally validated CARM model, with good performance for  
48  
49 estimating the risk of in-hospital mortality following emergency medical admission using the  
50  
51 patient’s first, electronically recorded, vital signs and blood test results. Since CARM places no  
52  
53 additional data collection burden on clinicians and is readily automated, it may now be carefully  
54  
55 introduced and evaluated in hospitals with electronic health records.  
56  
57  
58  
59  
60



## Acknowledgements

The authors would like to express their gratitude to Sue Rushbrook and Gary Hardcastle at York Hospital for their support in obtaining the data frame, and to Laura Lamming at the University of Bradford for her support with the Ethics application.

## Funding

This research was supported by the Health Foundation. The Health Foundation is an independent charity working to improve the quality of health care in the UK.

This research was supported by the National Institute for Health Research (NIHR) Yorkshire and Humber Patient Safety Translational Research Centre (NIHR YHPSTRC). The views expressed in this article are those of the author(s) and not necessarily those of the NHS, the NIHR, or the Department of Health and Social Care.

## Contributorship

MAM & DR had the original idea for this work. NJ was overall study coordinator with JeD as local NLAG coordinator. MF, AS and MAM undertook the statistical analyses. JuD, CM & NJ are leads for qualitative studies. RH and KB extracted the necessary data frames. DR, MM and KS gave a clinical perspective. MAM and MF wrote the first draft of this paper and all authors subsequently assisted in redrafting and have approved the final version. MAM will act as guarantor.

**Competing Interests:** The authors declare no conflicts of interest.

**Table 1 Number and mortality of emergency medical admissions included/excluded.**

| Characteristic                                                   | Development dataset | Validation dataset |
|------------------------------------------------------------------|---------------------|--------------------|
|                                                                  | N (%)               | N (%)              |
| Total emergency medical admissions                               | 37100               | 36751              |
| Excluded: No NEWS recorded (%)                                   | 1305 (3.5)          | 772 (2.1)          |
| Excluded: First NEWS after 24 hours of admission (%)             | 634 (1.7)           | 172 (0.5)          |
| Excluded: First blood test results after 4 days of admission (%) | 464 (1.3)           | 673 (1.8)          |
| Excluded: No or incomplete blood test results recorded (%)       | 3701 (10.0)         | 8887 (24.2)        |
| Total excluded (%)                                               | 6104 (16.5)         | 10504 (28.6)       |
| Total included (%)                                               | 30996 (83.5)        | 26247 (71.4)       |

1  
2  
3  
4  
5  
6  
7  
8  
9  
10  
11  
12  
13  
14  
15  
16  
17  
18  
19  
20  
21  
22  
23  
24  
25  
26  
27  
28  
29  
30  
31  
32  
33  
34  
35  
36  
37  
38  
39  
40  
41  
42  
43  
44  
45  
46  
47  
48  
49  
50  
51  
52  
53  
54  
55  
56  
57  
58  
59  
60

For peer review only

**Table 2 Characteristics of emergency admissions for development and validation datasets.**

| Characteristic                                  | Development dataset (NH) |                 | Validation dataset (YH) |                 |
|-------------------------------------------------|--------------------------|-----------------|-------------------------|-----------------|
|                                                 | Discharged Alive         | Discharged Died | Discharged Alive        | Discharged Died |
| N                                               | 29230                    | 1766            | 24544                   | 1703            |
| Median Length of Stay (days) (IQR)              | 4.3 (8.3)                | 8.3 (13.3)      | 3.9 (7.7)               | 8.1 (14.1)      |
| Male (%)                                        | 14557 (49.8)             | 887 (50.2)      | 11646 (47.5)            | 845 (49.6)      |
| Mean NEWS (SD)                                  | 2.1 (2.2)                | 4.5 (3.2)       | 2.5 (2.5)               | 5.0 (3.6)       |
| Alertness                                       |                          |                 |                         |                 |
| Alert (%)                                       | 28788 (98.5)             | 1613 (91.3)     | 23953 (97.6)            | 1503 (88.3)     |
| Pain (%)                                        | 80 (0.3)                 | 31 (1.8)        | 131 (0.5)               | 49 (2.9)        |
| Voice (%)                                       | 315 (1.1)                | 83 (4.7)        | 357 (1.5)               | 106 (6.2)       |
| Unconscious (%)                                 | 47 (0.2)                 | 39 (2.2)        | 103 (0.4)               | 45 (2.6)        |
| AKI Score                                       |                          |                 |                         |                 |
| 0 (%)                                           | 27063 (92.6)             | 1326 (75.1)     | 22133 (90.2)            | 936 (55.0)      |
| 1 (%)                                           | 1358 (4.7)               | 204 (11.6)      | 1482 (6.0)              | 451 (26.5)      |
| 2 (%)                                           | 429 (1.5)                | 129 (7.3)       | 369 (1.5)               | 191 (11.2)      |
| 3 (%)                                           | 380 (1.3)                | 107 (6.1)       | 560 (2.3)               | 125 (7.3)       |
| Oxygen supplementation (%)                      | 5364 (18.4)              | 900 (51.0)      | 2549 (10.4)             | 582 (34.2)      |
| Mean Age [years] (SD)                           | 66.2 (19.5)              | 79.8 (11.1)     | 67.5 (19.4)             | 80 (11.7)       |
| Mean Albumin [g/L] (SD)                         | 33.7 (5.9)               | 27.3 (6.4)      | 38.2 (5.7)              | 32.9 (6)        |
| Mean Creatinine [umol/L] (SD)                   | 103.3 (78.2)             | 148.9 (124.4)   | 100.8 (90.6)            | 138.7 (119)     |
| Mean Haemoglobin [g/l] (SD)                     | 127.8 (22.2)             | 117.1 (22.8)    | 125.2 (22)              | 117.1 (23.2)    |
| Mean Potassium [mmol/L] (SD)                    | 4.1 (0.6)                | 4.3 (0.8)       | 4.3 (0.6)               | 4.4 (0.8)       |
| Mean Sodium [mmol/L] (SD)                       | 137 (5.1)                | 136 (7)         | 136.6 (4.6)             | 136.1 (6.2)     |
| Mean White cell count [ $10^9$ cells/L] (SD)    | 9.8 (6.5)                | 13.2 (13.3)     | 10.2 (10.7)             | 13.9 (21.1)     |
| Mean Urea [mmol/L] (SD)                         | 7.5 (5.6)                | 14.1 (10.5)     | 7.8 (5.6)               | 13.3 (8.9)      |
| Mean Respiratory rate [breaths per minute] (SD) | 18 (3.5)                 | 20.1 (4.8)      | 18.6 (4.6)              | 21.7 (6.8)      |
| Mean Temperature [ $^{\circ}$ C] (SD)           | 36.5 (0.7)               | 36.3 (0.8)      | 36.3 (0.8)              | 36.1 (1.1)      |
| Mean Systolic pressure [mmHg] (SD)              | 129.6 (22.7)             | 119.8 (24.8)    | 136.1 (27.2)            | 128.5 (30.3)    |
| Mean Diastolic pressure [mmHg] (SD)             | 75 (14.8)                | 69.5 (15.8)     | 75.4 (15.5)             | 71.3 (17.7)     |
| Mean Pulse rate [beats per minute] (SD)         | 81.3 (17.7)              | 86.5 (19.7)     | 86.2 (20.9)             | 92.1 (23.3)     |
| Mean % Oxygen saturation (SD)                   | 96.0 (2.9)               | 94.6 (4.7)      | 96.3 (2.9)              | 95.0 (4.4)      |

**Table 3 Comparing calibration and discrimination of CARM model to predict in-hospital mortality in development and validation datasets**

| Dataset             | Mean predicted risk: Alive | Mean predicted risk: Died‡ | Discrimination slope† | Scaled Brier Score | AUC [95% CI]                           | Median Imputed AUC [95% CI] |
|---------------------|----------------------------|----------------------------|-----------------------|--------------------|----------------------------------------|-----------------------------|
| Development dataset | 0.047                      | 0.229                      | 0.183                 | 0.175              | 0.874 <sup>#</sup><br>[0.866 to 0.881] | 0.915<br>[0.888 to 0.941]   |
| Validation dataset  | 0.053                      | 0.231                      | 0.178                 | 0.165              | 0.861<br>[0.852 to 0.869]              | 0.900<br>[0.880 to 0.919]   |

NB:

† mean predicted risk difference between who discharged died and discharged alive.

‡ Died in-hospital following emergency admission

# corrected optimism (original = 0.874, and corrected=0.873).

**Table 4 Sensitivity, specificity and predictive values for the CARM model at various cut-offs in the development dataset and validation dataset**

| Dataset             | Risk Value Cut-off | No of patients > cutoff | %Sensitivity (95% CI)  | %Specificity (95% CI)  | %PPV (95% CI)          | %NPV (95% CI)          | LR+ (95% CI)        | LR- (95% CI)        |
|---------------------|--------------------|-------------------------|------------------------|------------------------|------------------------|------------------------|---------------------|---------------------|
| Development dataset | 0.01               | 19876                   | 98.5<br>(97.9 to 99)   | 38<br>(37.4 to 38.5)   | 8.8<br>(8.4 to 9.2)    | 99.8<br>(99.7 to 99.8) | 1.6<br>(1.6 to 1.6) | 0<br>(0 to 0.1)     |
|                     | 0.02               | 15297                   | 95.7<br>(94.6 to 96.6) | 53.4<br>(52.9 to 54)   | 11<br>(10.6 to 11.6)   | 99.5<br>(99.4 to 99.6) | 2.1<br>(2 to 2.1)   | 0.1<br>(0.1 to 0.1) |
|                     | 0.04               | 10382                   | 87.3<br>(85.6 to 88.8) | 69.8<br>(69.2 to 70.3) | 14.8<br>(14.2 to 15.5) | 98.9<br>(98.8 to 99)   | 2.9<br>(2.8 to 3)   | 0.2<br>(0.2 to 0.2) |
|                     | 0.08               | 6070                    | 72.2<br>(70 to 74.3)   | 83.6<br>(83.2 to 84)   | 21<br>(20 to 22.1)     | 98<br>(97.8 to 98.2)   | 4.4<br>(4.2 to 4.6) | 0.3<br>(0.3 to 0.4) |
|                     | 0.20               | 2190                    | 42<br>(39.6 to 44.3)   | 95<br>(94.8 to 95.3)   | 33.8<br>(31.9 to 35.9) | 96.4<br>(96.2 to 96.7) | 8.5<br>(7.9 to 9.1) | 0.6<br>(0.6 to 0.6) |
| Validation dataset  | 0.01               | 18338                   | 98.4<br>(97.7 to 99)   | 32.1<br>(31.5 to 32.7) | 9.1<br>(8.7 to 9.6)    | 99.7<br>(99.5 to 99.8) | 1.4<br>(1.4 to 1.5) | 0<br>(0 to 0.1)     |
|                     | 0.02               | 14537                   | 95.9<br>(94.9 to 96.8) | 47.4<br>(46.8 to 48.1) | 11.2<br>(10.7 to 11.8) | 99.4<br>(99.3 to 99.5) | 1.8<br>(1.8 to 1.9) | 0.1<br>(0.1 to 0.1) |
|                     | 0.04               | 10047                   | 89<br>(87.4 to 90.4)   | 65.2<br>(64.6 to 65.8) | 15.1<br>(14.4 to 15.8) | 98.8<br>(98.7 to 99)   | 2.6<br>(2.5 to 2.6) | 0.2<br>(0.1 to 0.2) |
|                     | 0.08               | 5871                    | 73.2<br>(71 to 75.3)   | 81.2<br>(80.7 to 81.6) | 21.2<br>(20.2 to 22.3) | 97.8<br>(97.5 to 98)   | 3.9<br>(3.7 to 4)   | 0.3<br>(0.3 to 0.4) |
|                     | 0.20               | 2158                    | 43.1<br>(40.7 to 45.5) | 94.2<br>(93.9 to 94.5) | 34<br>(32 to 36.1)     | 96<br>(95.7 to 96.2)   | 7.4<br>(6.9 to 8)   | 0.6<br>(0.6 to 0.6) |

PPV = Positive Predictive Value; NPV = Negative Predictive Value;  
LR+ = Positive Likelihood Ratio; LR- = Negative Likelihood Ratio

**Figure 1 Area under the Receiver Operating Characteristic curve for development dataset (0.87) and validation dataset (0.86).**

## References

- 1 Brabrand M, Folkestad L, Clausen NG, *et al*. Risk scoring systems for adults admitted to the emergency department: a systematic review. *Scand J Trauma Resusc Emerg Med* 2010;**18**:8. doi:10.1186/1757-7241-18-8
- 2 Silke B, Kellett J, Rooney T, *et al*. An improved medical admissions risk system using multivariable fractional polynomial logistic regression modelling. *QJM An Int J Med* 2010;**103**:23–32. doi:10.1093/qjmed/hcp149
- 3 Royal College of Physicians: National Early Warning Score (NEWS): Standardising the assessment of acute illness severity in the NHS <https://www.rcplondon.ac.uk/news/nhs-england-approves-use-national-early-warning-score-news-2-improve-detection-acutely-ill>.
- 4 McGinley A, Pearse RM. A national early warning score for acutely ill patients. *BMJ* 2012;**345**:e5310.
- 5 Smith GB, Prytherch DR, Schmidt P, *et al*. Hospital-wide physiological surveillance—A new approach to the early identification and management of the sick patient. *Resuscitation* 2006;**71**:19–28. doi:10.1016/j.resuscitation.2006.03.008
- 6 Edwards M, McKay H, Van Leuvan C, *et al*. Modified Early Warning Scores: inaccurate summation or inaccurate assignment of score? *Crit Care* 2010;**14**:P257. doi:10.1186/cc8489
- 7 Prytherch DR, Smith GB, Schmidt P, *et al*. Calculating early warning scores—a classroom comparison of pen and paper and hand-held computer methods. *Resuscitation* 2006;**70**:173–8. doi:10.1016/j.resuscitation.2005.12.002
- 8 Mohammed M, Hayton R, Clements G, *et al*. Improving accuracy and efficiency of early warning scores in acute care. *Br J Nurs*; **18**:18–24. doi:10.12968/bjon.2009.18.1.32072
- 9 NHS England: Acute Kidney Injury (AKI) Programme. <http://www.thinkkidneys.nhs.uk>, 2014. <http://www.england.nhs.uk/ourwork/patientsafety/akiprogramme/>.
- 10 NCEPOD: Acute Kidney Injury: Adding Insult to Injury. National Confidential Enquiry into Patient Outcome and Death, 2009.
- 11 StatCorp. Stata: Release 13. Statistical Software. College Station, TX: StataCorp LP; 2014.
- 12 Venables W, Ripley B. *Modern Applied Statistics with S*. Fourth Edn. New York: Springer 2002.
- 13 R Development Core Team. R: A language and environment for statistical computing. R Foundation for Statistical Computing <http://www.r-project.org/>. 2015.
- 14 Steyerberg EW. *Clinical Prediction Models. A practical approach to development, validation and updating*. Springer 2008.
- 15 Harrell FE. rms: Regression Modeling Strategies <http://cran.r-project.org/package=rms>. 2015.
- 16 Cox DR. Two further applications of a model for binary regression. *Biometrika* 1958;**45**:562–5. doi:10.1093/biomet/45.3-4.562
- 17 Steyerberg EW, Vickers AJ, Cook NR, *et al*. Assessing the performance of prediction models: a framework for traditional and novel measures. *Epidemiology* 2010;**21**:128–38. doi:10.1097/EDE.0b013e3181c30fb2

- 1  
2  
3 18 Hanley JA, McNeil BJ. The meaning and use of the area under a receiver operating  
4 characteristic (ROC) curve. *Radiology* 1982;**143**:29–36. doi:10.1148/radiology.143.1.7063747
- 5  
6 19 Robin X, Turck N, Hainard A, *et al.* pROC: an open-source package for R and S+ to analyze and  
7 compare ROC curves. *BMC Bioinformatics* 2011;**12**:77. doi:10.1186/1471-2105-12-77
- 8  
9 20 Moons KGM, Altman DG, Reitsma JB, *et al.* Transparent Reporting of a multivariable  
10 prediction model for Individual Prognosis Or Diagnosis (TRIPOD): Explanation and  
11 Elaboration. *Ann Intern Med* 2015;**162**:W1. doi:10.7326/M14-0698
- 12  
13 21 Prytherch DR, Sirl JS, Weaver PC, *et al.* Towards a national clinical minimum data set for  
14 general surgery. *Br J Surg* 2003;**90**:1300–5. doi:10.1002/bjs.4274
- 15  
16 22 Prytherch DR, Sirl JS, Schmidt P, *et al.* The use of routine laboratory data to predict in-hospital  
17 death in medical admissions. *Resuscitation* 2005;**66**:203–7.  
18 doi:10.1016/j.resuscitation.2005.02.011
- 19  
20 23 Pine M, Jones B, Lou YB. Laboratory values improve predictions of hospital mortality. *Int J*  
21 *Qual Heal care J Int Soc Qual Heal Care* 1998;**10**:491–501.
- 22  
23 24 Vroonhof K, van Solinge WW, Rovers MM, *et al.* Differences in mortality on the basis of  
24 laboratory parameters in an unselected population at the Emergency Department. *Clin Chem*  
25 *Lab Med* 2005;**43**:536–41. doi:10.1515/CCLM.2005.093
- 26  
27 25 Hucker TR, Mitchell GP, Blake LD, *et al.* Identifying the sick: can biochemical measurements  
28 be used to aid decision making on presentation to the accident and emergency department.  
29 *Br J Anaesth* 2005;**94**:735–41. doi:10.1093/bja/aei122
- 30  
31 26 Froom P, Shimoni Z. Prediction of Hospital Mortality Rates by Admission Laboratory Tests.  
32 *Clin Chem* 2005;**52**:325–8. doi:10.1373/clinchem.2005.059030
- 33  
34 27 Asadollahi K, Hastings IM, Gill G V, *et al.* Prediction of hospital mortality from admission  
35 laboratory data and patient age: A simple model. *Emerg Med Australas* 2011;**23**:354–63.  
36 doi:10.1111/j.1742-6723.2011.01410.x
- 37  
38 28 ten Boekel E, Vroonhof K, Huisman A, *et al.* Clinical laboratory findings associated with in-  
39 hospital mortality. *Clin Chim Acta* 2006;**372**:1–13. doi:10.1016/J.CCA.2006.03.024
- 40  
41 29 Duckitt RW, Buxton-Thomas R, Walker J, *et al.* Worthing physiological scoring system:  
42 derivation and validation of a physiological early-warning system for medical admissions. An  
43 observational, population-based single-centre study†‡. *BJA Br J Anaesth* 2007;**98**:769–74.  
44 doi:10.1093/bja/aem097
- 45  
46 30 Hodgetts TJ, Kenward G, Vlachonikolis IG, *et al.* The identification of risk factors for cardiac  
47 arrest and formulation of activation criteria to alert a medical emergency team. *Resuscitation*  
48 **2002**;**54**:125–31.
- 49  
50 31 Prytherch DR, Briggs JS, Weaver PC, *et al.* Measuring clinical performance using routinely  
51 collected clinical data. *Med Inform Internet Med* 2005;**30**:151–6.  
52 doi:10.1080/14639230500298966
- 53  
54 32 Silke B, Kellett J, Rooney T, *et al.* An improved medical admissions risk system using  
55 multivariable fractional polynomial logistic regression modelling. *QJM* 2010;**103**:23–32.  
56 doi:10.1093/qjmed/hcp149
- 57  
58  
59  
60

- 1  
2  
3 33 O'Sullivan E, Callely E, O'Riordan D, *et al.* Predicting outcomes in emergency medical  
4 admissions - role of laboratory data and co-morbidity. *Acute Med* 2012;**11**:59–65.  
5  
6 34 Mohammed M a., Rudge G, Watson D, *et al.* Index Blood Tests and National Early Warning  
7 Scores within 24 Hours of Emergency Admission Can Predict the Risk of In-Hospital Mortality:  
8 A Model Development and Validation Study. *PLoS One* 2013;**8**.  
9 doi:10.1371/journal.pone.0064340  
10  
11 35 Faisal M, Scally A, Richardson D, *et al.* Development and External Validation of an Automated  
12 Computer-Aided Risk Score for Predicting Sepsis in Emergency Medical Admissions Using the  
13 Patient's First Electronically Recorded Vital Signs and Blood Test Results. *Crit Care Med*  
14 2018;**46**:612–8. doi:10.1097/CCM.0000000000002967  
15  
16 36 Algorithm for detecting Acute Kidney Injury (AKI) based on serum creatinine changes with  
17 time <https://www.england.nhs.uk/wp-content/uploads/2014/06/psa-aki-alg.pdf>. 2014.  
18  
19 37 Silcock DJ, Corfield AR, Gowens PA, *et al.* Validation of the National Early Warning Score in  
20 the prehospital setting. *Resuscitation* 2015;**89**:31–5. doi:10.1016/j.resuscitation.2014.12.029  
21  
22 38 Escobar GJ, Dellinger RP. Early detection, prevention, and mitigation of critical illness outside  
23 intensive care settings. *J Hosp Med* 2016;**11**:S5–10. doi:10.1002/jhm.2653  
24  
25 39 Escobar GJ, Turk BJ, Ragins A, *et al.* Piloting electronic medical record-based early detection  
26 of inpatient deterioration in community hospitals. *J Hosp Med* 2016;**11**:S18–24.  
27 doi:10.1002/jhm.2652  
28  
29  
30  
31  
32  
33  
34  
35  
36  
37  
38  
39  
40  
41  
42  
43  
44  
45  
46  
47  
48  
49  
50  
51  
52  
53  
54  
55  
56  
57  
58  
59  
60



1  
2  
3  
4  
5  
6  
7  
8  
9  
10  
11  
12  
13  
14  
15  
16  
17  
18  
19  
20  
21  
22  
23  
24  
25  
26  
27  
28  
29  
30  
31  
32  
33  
34  
35  
36  
37  
38  
39  
40  
41  
42  
43  
44  
45  
46  
47  
48  
49  
50  
51  
52  
53  
54  
55  
56  
57  
58  
59  
60



Area under the Receiver Operating Characteristic curve for development dataset (0.87) and validation dataset (0.86).

254x127mm (300 x 300 DPI)

## Supplementary Material

The NEWS [<https://www.rcplondon.ac.uk/projects/outputs/national-early-warning-score-news>] is based on a scoring system in which a score is allocated to vital signs physiological measurements already undertaken when patients present to, or are being monitored in hospital. Six physiological parameters form the basis of the scoring system:

| Physiological Parameters | 3     | 2        | 1           | 0           | 1           | 2         | 3                           |
|--------------------------|-------|----------|-------------|-------------|-------------|-----------|-----------------------------|
| Respiration Rate         | ≤8    |          | 9 - 11      | 12 - 20     |             | 21 - 24   | ≥25                         |
| Oxygen Saturations       | ≤91   | 92 - 93  | 94 - 95     | ≥96         |             |           |                             |
| Any Supplemental Oxygen  |       | Yes      |             | No          |             |           |                             |
| Temperature              | ≤35.0 |          | 35.1 - 36.0 | 36.1 - 38.0 | 38.1 - 39.0 | ≥39.1     |                             |
| Systolic BP              | ≤90   | 91 - 100 | 101 - 110   | 111 - 219   |             |           | ≥220                        |
| Heart Rate               | ≤40   |          | 41 - 50     | 51-90       | 91 - 110    | 111 - 130 | ≥131                        |
| Level of Consciousness   |       |          |             | Alert       |             |           | Voice, Pain, or Unconscious |

A score is allocated to each as they are measured, the magnitude of the score reflecting how extreme the parameter varies from the norm. This score is then aggregated, and uplifted for people requiring oxygen.

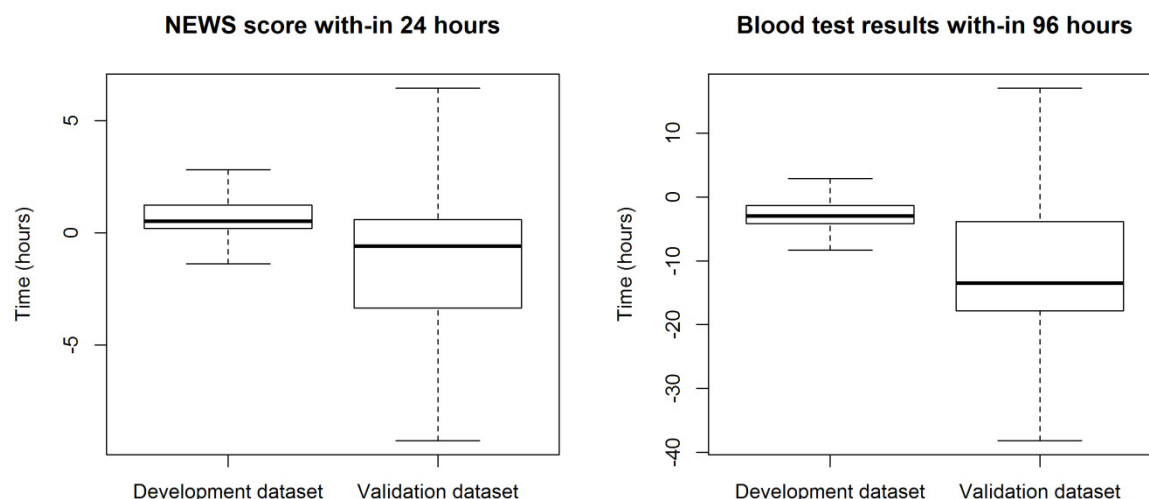

**Figure S1 Distribution of time to first NEWS score and Blood test results for development and validation datasets.**

| Blood tests results recorded | Development dataset<br>N(%) | Validation dataset<br>N(%) |
|------------------------------|-----------------------------|----------------------------|
| within 24 hours              | 29255 (94.4)                | 24341 (92.7)               |
| within 48 hours              | 894 (2.9)                   | 1098 (4.2)                 |
| within 72 hours              | 512 (1.6)                   | 495 (1.9)                  |
| within 96 hours              | 335 (1.1)                   | 313 (1.2)                  |

**Table S1 Distribution of time to the first set of Blood test results recorded within 4 days for development and validation datasets.**

| Characteristic                     | Development dataset | Validation dataset |
|------------------------------------|---------------------|--------------------|
| N                                  | 6104                | 10504              |
| Male (%)                           | 3008 (49.3)         | 4875 (46.4)        |
| Mean Age (SD)                      | 61.4 (20.2)         | 64.7 (21.4)        |
| Median Length of Stay (days) (IQR) | 1.1 (4.0)           | 1.4 (4.4)          |
| In-hospital mortality (%)          | 405 (6.6)           | 434 (4.1)          |

**Table S2 Characteristics of emergency admissions with incomplete data in development and validation datasets.**

| Variable Name                              | Coefficient | Example 1 (Discharged alive) |             |                 | Example 2 (Discharged dead) |             |                 |
|--------------------------------------------|-------------|------------------------------|-------------|-----------------|-----------------------------|-------------|-----------------|
|                                            |             | Values                       | Transformed | Log(Odds)       | Values                      | Transformed | Log(Odds)       |
| Intercept                                  | -3.22       | 1                            | 1           | -3.22           | 1                           | 1           | -3.22           |
| Male                                       | 0.14        | 1                            | 1           | 0.14            | 0                           | 0           | 0               |
| Age                                        | 0.077       | 51                           | 51          | 3.927           | 44                          | 44          | 3.388           |
| Albumin                                    | -0.104      | 36                           | 36          | -3.744          | 11                          | 11          | -1.144          |
| 1/sqrt(Creatinine)                         | 9.883       | 86                           | 0.107832773 | 1.065711        | 153                         | 0.080845    | 0.798993        |
| Haemoglobin                                | 0.002       | 148                          | 148         | 0.296           | 48                          | 48          | 0.096           |
| Log(Potassium)                             | -0.024      | 3.4                          | 1.223775354 | -0.02937        | 6.9                         | 1.931521    | -0.04636        |
| Sodium                                     | -0.023      | 111                          | 111         | -2.553          | 130                         | 130         | -2.99           |
| Log(White Blood Count)                     | 1.167       | 12                           | 2.484906493 | 2.899886        | 34.7                        | 3.546739    | 4.139045        |
| Log(Urea)                                  | 1.211       | 7.8                          | 2.054123604 | 2.487544        | 28.6                        | 3.353407    | 4.060975        |
| <b>AKI (reference 0)</b>                   | 0           | 0                            | 0           | 0               | 0                           | 0           | 0               |
| AKI stage 1                                | 0.131       | 0                            | 0           | 0               | 0                           | 0           | 0               |
| AKI stage 2                                | 0.443       | 0                            | 0           | 0               | 1                           | 1           | 0.443           |
| AKI stage 3                                | -0.388      | 0                            | 0           | 0               | 0                           | 0           | 0               |
| NEWS                                       | 0.093       | 2                            | 2           | 0.186           | 9                           | 9           | 0.837           |
| Log(Respiratory)                           | 0.569       | 16                           | 2.772588547 | 1.577603        | 22                          | 3.091042    | 1.758803        |
| Temperature                                | -0.145      | 36                           | 36          | -5.22           | 36.5                        | 36.5        | -5.2925         |
| Log(Systolic)                              | -0.919      | 133                          | 4.89034882  | -4.49423        | 112                         | 4.718499    | -4.3363         |
| Log(Diastolic)                             | 0.777       | 79                           | 4.369447577 | 3.395061        | 74                          | 4.304065    | 3.344258        |
| Log(Pulse)                                 | 0.511       | 63                           | 4.143134465 | 2.117142        | 149                         | 5.003946    | 2.557016        |
| Oxygen Saturation                          | -0.016      | 94                           | 94          | -1.504          | 95                          | 95          | -1.52           |
| Oxygen supplementation                     | 0.606       | 0                            | 0           | 0               | 0                           | 0           | 0               |
| <b>Alert</b>                               | 0           | 0                            | 0           | 0               | 0                           | 0           | 0               |
| Pain                                       | 0.716       | 0                            | 0           | 0               | 0                           | 0           | 0               |
| Voice                                      | 0.395       | 0                            | 0           | 0               | 0                           | 0           | 0               |
| Unconscious                                | 1.925       | 0                            | 0           | 0               | 1                           | 1           | 1.925           |
| Age * Log(White Cell Count)                | -0.015      | -                            | 126.7302311 | -1.90095        | -                           | 156.0565    | -2.34085        |
| 1/sqrt( Creatinine)* Log(White Cell Count) | 1.481       | -                            | 0.267954358 | 0.39684         | -                           | 0.286737    | 0.424657        |
| AKI stage 3 * 1/sqrt( Creatinine)          | 15.551      | -                            | 0           | 0               | -                           | 0           | 0               |
| <b>Sum of Log(Odds)</b>                    |             | -                            | -           | <b>-4.17677</b> | -                           | -           | <b>2.882744</b> |
| <b>Probability of dying</b>                |             | -                            | -           | <b>0.015116</b> | -                           | -           | <b>0.946987</b> |

**Table S3 Coefficient of CARM model to predict in-hospital mortality with two examples (one discharged alive and one discharged died).**

We accounted a baseline difference in risk of death in the external validation data by adding 0.52 to the CARM logit model using an iterative procedure described elsewhere[1].

- 1 Faisal M, Howes R, Steyerberg EW, *et al.* Using routine blood test results to predict the risk of death for emergency medical admissions to hospital: an external model validation study. *QJM* 2017;**110**:27–31. doi:10.1093/qjmed/hcw110

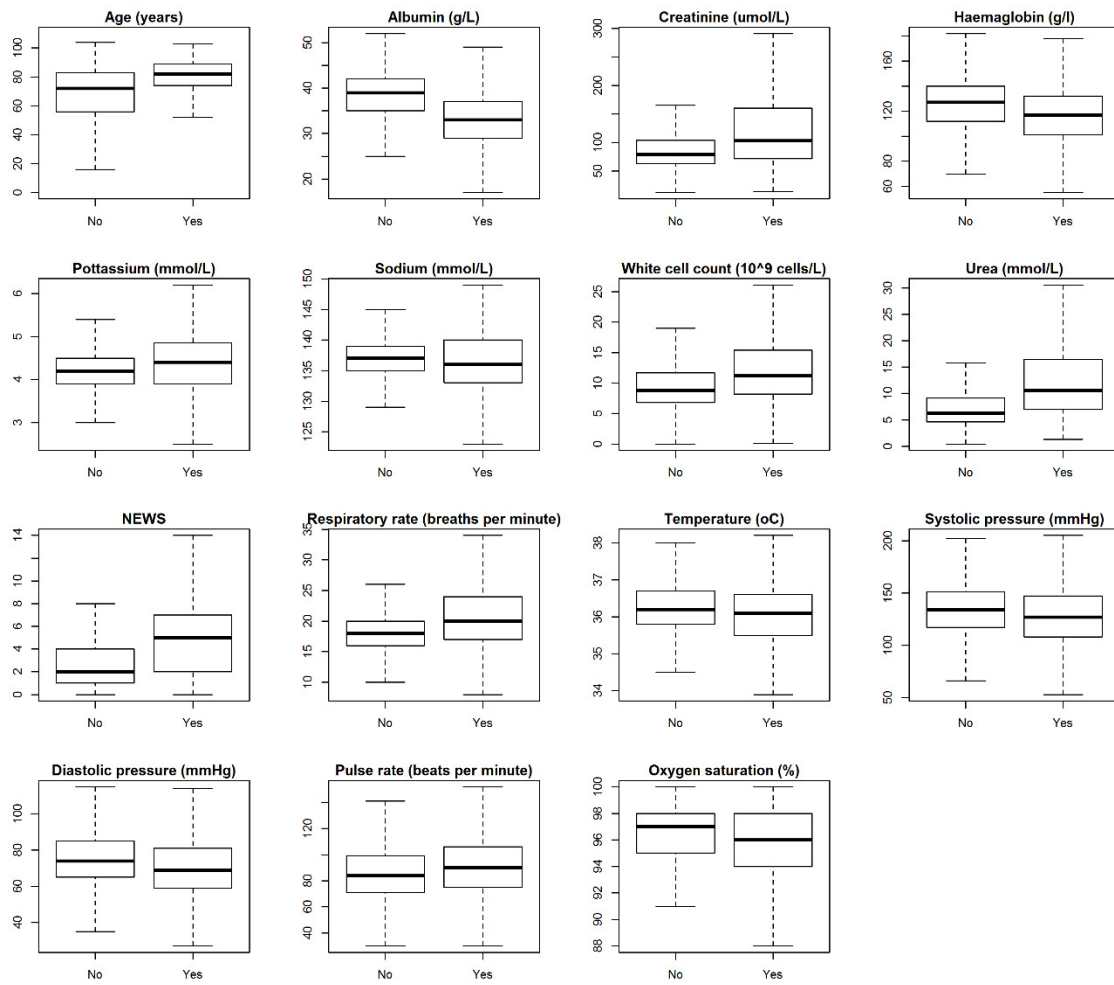

Figure S2 Boxplot without outliers for continuous covariates with respect to patient's discharge status (Alive/Died) for NLAG hospitals

only

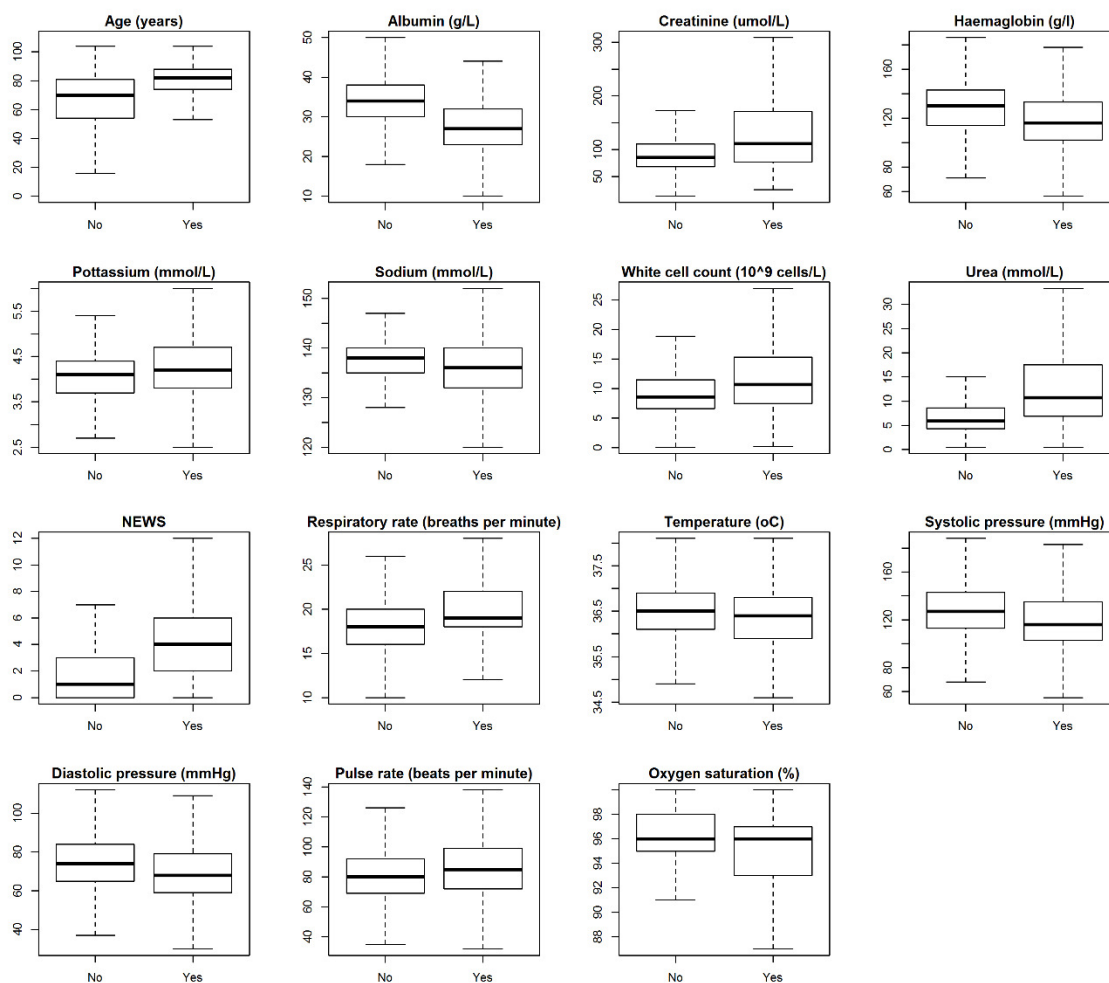

**Figure S3 Boxplot without outliers for continuous covariates with respect to patient's discharge status (Alive/Died) for York hospital**

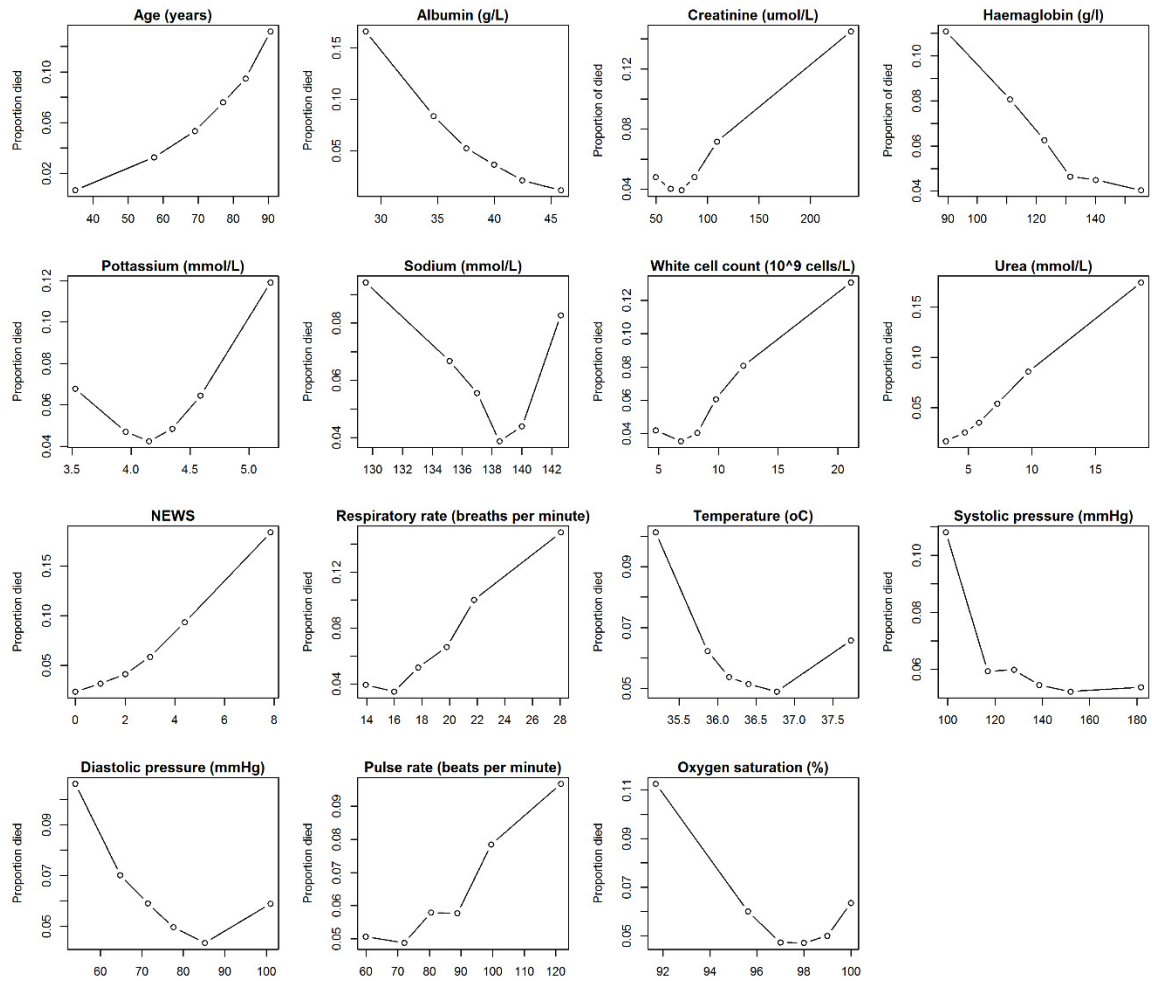

**Figure S4** Line plots showing the observed risk of death with continuous covariates for NLAG hospitals

NB: y-axis range changes in each plot.

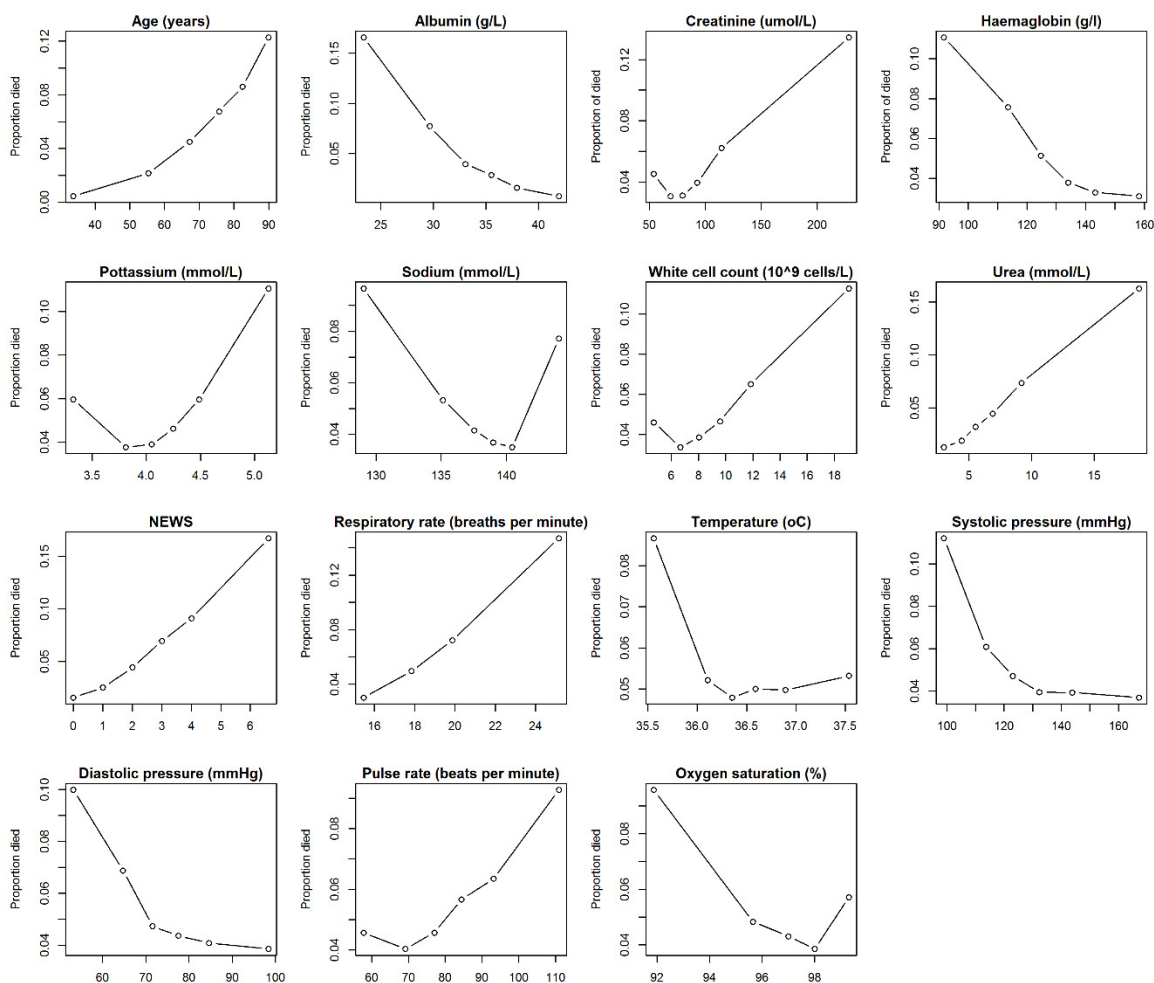

**Figure S5** Line plots showing the observed risk of death with continuous covariates for York hospital.

NB: y-axis range changes in each plot.



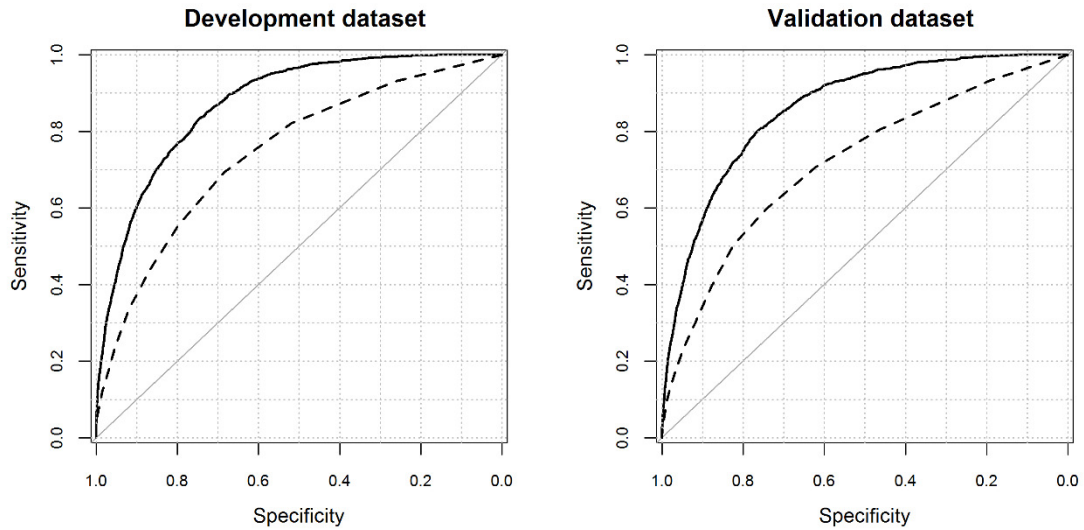

**Figure S6** Area under the Receiver Operating Characteristic curve for development dataset (NEWS=0.75, CARM=0.87) and validation dataset (NEWS=0.72, CARM=0.86).

Black dashed line for NEWS and black solid line for CARM

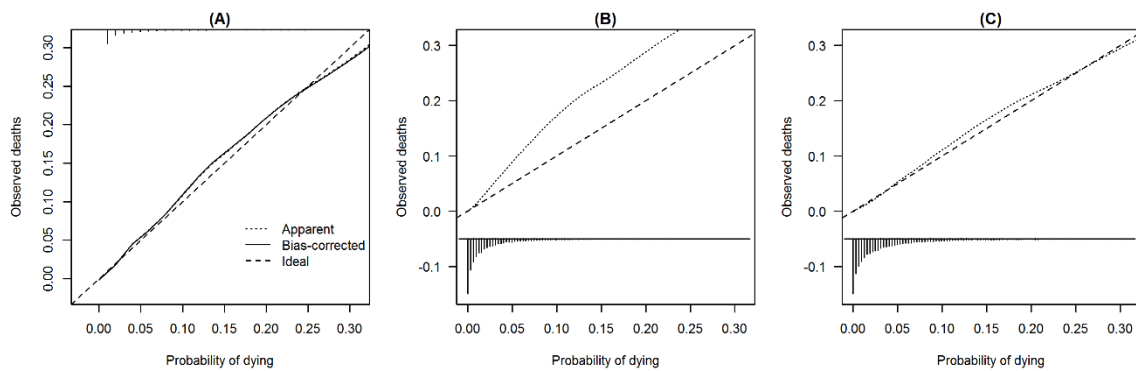

**Figure S7** Internal and external validation with and without recalibration of CARM model

(A) Internal validation (B) external validation before recalibration (C) external validation after recalibration

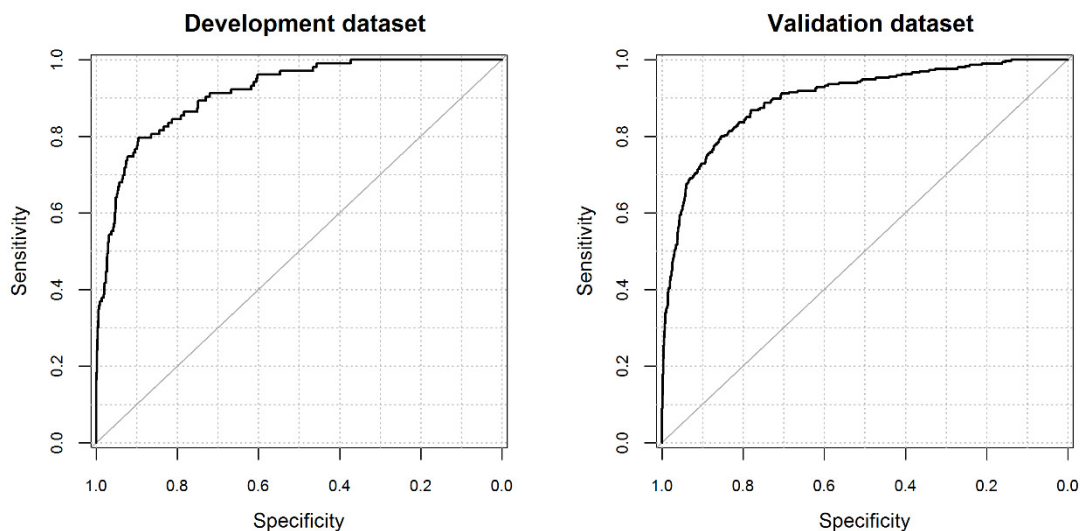

**Figure S8 Receiver Operating Characteristic curve of (median) imputed blood tests results on development dataset and validation dataset.**

NB: patients with imputed values were omitted during model development and validation.

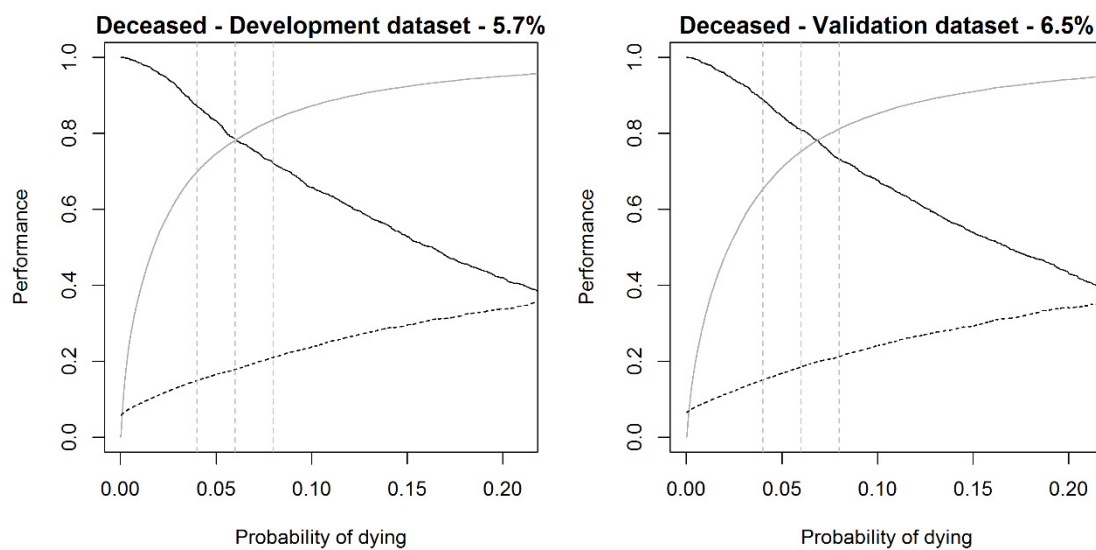

**Figure S9: Sensitivity analysis of CARM model at various thresholds of probability of dying (0.0, 0.01, ..., 0.20) on development dataset and validation dataset.**

Black solid line is for sensitivity and black dashed line is for positive predictive value (PPV). Grey solid line is specificity and grey dashed vertical lines are at thresholds (0.04, 0.06, and 0.08).

NB: We selected thresholds exclusively based on development dataset.

## TRIPOD Checklist: Prediction Model Development and Validation

| Section/Topic                | Item | Checklist Item | Page                                                                                                                                                                                                  |       |
|------------------------------|------|----------------|-------------------------------------------------------------------------------------------------------------------------------------------------------------------------------------------------------|-------|
| <b>Title and abstract</b>    |      |                |                                                                                                                                                                                                       |       |
| Title                        | 1    | D;V            | Identify the study as developing and/or validating a multivariable prediction model, the target population, and the outcome to be predicted.                                                          | 1     |
| Abstract                     | 2    | D;V            | Provide a summary of objectives, study design, setting, participants, sample size, predictors, outcome, statistical analysis, results, and conclusions.                                               | 3     |
| <b>Introduction</b>          |      |                |                                                                                                                                                                                                       |       |
| Background and objectives    | 3a   | D;V            | Explain the medical context (including whether diagnostic or prognostic) and rationale for developing or validating the multivariable prediction model, including references to existing models.      | 5     |
|                              | 3b   | D;V            | Specify the objectives, including whether the study describes the development or validation of the model or both.                                                                                     | 6     |
| <b>Methods</b>               |      |                |                                                                                                                                                                                                       |       |
| Source of data               | 4a   | D;V            | Describe the study design or source of data (e.g., randomized trial, cohort, or registry data), separately for the development and validation data sets, if applicable.                               | 6     |
|                              | 4b   | D;V            | Specify the key study dates, including start of accrual; end of accrual; and, if applicable, end of follow-up.                                                                                        | 7     |
| Participants                 | 5a   | D;V            | Specify key elements of the study setting (e.g., primary care, secondary care, general population) including number and location of centres.                                                          | 7     |
|                              | 5b   | D;V            | Describe eligibility criteria for participants.                                                                                                                                                       | 7     |
|                              | 5c   | D;V            | Give details of treatments received, if relevant.                                                                                                                                                     |       |
| Outcome                      | 6a   | D;V            | Clearly define the outcome that is predicted by the prediction model, including how and when assessed.                                                                                                | 8     |
|                              | 6b   | D;V            | Report any actions to blind assessment of the outcome to be predicted.                                                                                                                                |       |
| Predictors                   | 7a   | D;V            | Clearly define all predictors used in developing or validating the multivariable prediction model, including how and when they were measured.                                                         | 7     |
|                              | 7b   | D;V            | Report any actions to blind assessment of predictors for the outcome and other predictors.                                                                                                            |       |
| Sample size                  | 8    | D;V            | Explain how the study size was arrived at.                                                                                                                                                            | 7     |
| Missing data                 | 9    | D;V            | Describe how missing data were handled (e.g., complete-case analysis, single imputation, multiple imputation) with details of any imputation method.                                                  | 7     |
| Statistical analysis methods | 10a  | D              | Describe how predictors were handled in the analyses.                                                                                                                                                 | 8     |
|                              | 10b  | D              | Specify type of model, all model-building procedures (including any predictor selection), and method for internal validation.                                                                         | 8     |
|                              | 10c  | V              | For validation, describe how the predictions were calculated.                                                                                                                                         | 8     |
|                              | 10d  | D;V            | Specify all measures used to assess model performance and, if relevant, to compare multiple models.                                                                                                   | 8,9   |
|                              | 10e  | V              | Describe any model updating (e.g., recalibration) arising from the validation, if done.                                                                                                               | suppl |
| Risk groups                  | 11   | D;V            | Provide details on how risk groups were created, if done.                                                                                                                                             |       |
| Development vs. validation   | 12   | V              | For validation, identify any differences from the development data in setting, eligibility criteria, outcome, and predictors.                                                                         | 8,9   |
| <b>Results</b>               |      |                |                                                                                                                                                                                                       |       |
| Participants                 | 13a  | D;V            | Describe the flow of participants through the study, including the number of participants with and without the outcome and, if applicable, a summary of the follow-up time. A diagram may be helpful. | 10    |
|                              | 13b  | D;V            | Describe the characteristics of the participants (basic demographics, clinical features, available predictors), including the number of participants with missing data for predictors and outcome.    | 10,11 |
|                              | 13c  | V              | For validation, show a comparison with the development data of the distribution of important variables (demographics, predictors and outcome).                                                        | 11    |
| Model development            | 14a  | D              | Specify the number of participants and outcome events in each analysis.                                                                                                                               | 10    |
|                              | 14b  | D              | If done, report the unadjusted association between each candidate predictor and outcome.                                                                                                              |       |
| Model specification          | 15a  | D              | Present the full prediction model to allow predictions for individuals (i.e., all regression coefficients, and model intercept or baseline survival at a given time point).                           | suppl |
|                              | 15b  | D              | Explain how to use the prediction model.                                                                                                                                                              | suppl |
| Model performance            | 16   | D;V            | Report performance measures (with CIs) for the prediction model.                                                                                                                                      | 11    |
| Model-updating               | 17   | V              | If done, report the results from any model updating (i.e., model specification, model performance).                                                                                                   |       |
| <b>Discussion</b>            |      |                |                                                                                                                                                                                                       |       |
| Limitations                  | 18   | D;V            | Discuss any limitations of the study (such as nonrepresentative sample, few events per predictor, missing data).                                                                                      | 12    |
| Interpretation               | 19a  | V              | For validation, discuss the results with reference to performance in the development data, and any other validation data.                                                                             | 12    |
|                              | 19b  | D;V            | Give an overall interpretation of the results, considering objectives, limitations, results from similar studies, and other relevant evidence.                                                        | 12,13 |
| Implications                 | 20   | D;V            | Discuss the potential clinical use of the model and implications for future research.                                                                                                                 | 13    |
| <b>Other information</b>     |      |                |                                                                                                                                                                                                       |       |
| Supplementary information    | 21   | D;V            | Provide information about the availability of supplementary resources, such as study protocol, Web calculator, and data sets.                                                                         | suppl |
| Funding                      | 22   | D;V            | Give the source of funding and the role of the funders for the present study.                                                                                                                         | 14    |

\*Items relevant only to the development of a prediction model are denoted by D, items relating solely to a validation of a prediction model are denoted by V, and items relating to both are denoted D;V. We recommend using the TRIPOD Checklist in conjunction with the TRIPOD Explanation and Elaboration document.

# BMJ Open

**Development and validation of a novel computer-aided score to predict the risk of in-hospital mortality for acutely ill medical admissions in two acute hospitals using their first electronically recorded blood test results and vital signs: a cross-sectional study**

|                                 |                                                                                                                                                                                                                                                                                                                                                                                                                                                                                                                                                                                                                                                                                                                                                                                                                                                                                                                            |
|---------------------------------|----------------------------------------------------------------------------------------------------------------------------------------------------------------------------------------------------------------------------------------------------------------------------------------------------------------------------------------------------------------------------------------------------------------------------------------------------------------------------------------------------------------------------------------------------------------------------------------------------------------------------------------------------------------------------------------------------------------------------------------------------------------------------------------------------------------------------------------------------------------------------------------------------------------------------|
| Journal:                        | <i>BMJ Open</i>                                                                                                                                                                                                                                                                                                                                                                                                                                                                                                                                                                                                                                                                                                                                                                                                                                                                                                            |
| Manuscript ID                   | bmjopen-2018-022939.R2                                                                                                                                                                                                                                                                                                                                                                                                                                                                                                                                                                                                                                                                                                                                                                                                                                                                                                     |
| Article Type:                   | Research                                                                                                                                                                                                                                                                                                                                                                                                                                                                                                                                                                                                                                                                                                                                                                                                                                                                                                                   |
| Date Submitted by the Author:   | 24-Sep-2018                                                                                                                                                                                                                                                                                                                                                                                                                                                                                                                                                                                                                                                                                                                                                                                                                                                                                                                |
| Complete List of Authors:       | Faisal, Muhammad; University of Bradford; Bradford Institute for Health Research<br>Scally, Andrew ; University College Cork<br>Jackson, Natalie; Bradford Institute for Health Research<br>Richardson, Donald; York Teaching Hospital NHS Foundation Trust<br>Beatson, Kevin; York Teaching Hospital NHS Foundation Trust<br>Howes, Robin; Northern Lincolnshire and Goole Hospitals NHS Foundation Trust<br>Speed, Kevin; Northern Lincolnshire and Goole Hospitals NHS Foundation Trust<br>Menon, Madhav; Northern Lincolnshire and Goole Hospitals NHS Foundation Trust<br>Daws, Jeremy; Northern Lincolnshire and Goole Hospitals NHS Foundation Trust<br>Dyson, Judith; University of Hull, Department of Community Health and Social Care<br>Marsh, Claire; Bradford Institute for Health Research<br>Mohammed, Mohammed ; University of Bradford Faculty of Health Studies; Bradford Institute for Health Research |
| <b>Primary Subject Heading</b>: | Health services research                                                                                                                                                                                                                                                                                                                                                                                                                                                                                                                                                                                                                                                                                                                                                                                                                                                                                                   |
| Secondary Subject Heading:      | Health informatics                                                                                                                                                                                                                                                                                                                                                                                                                                                                                                                                                                                                                                                                                                                                                                                                                                                                                                         |
| Keywords:                       | computer aided risk score, hospital mortality, vital signs and blood test, national early warning score, emergency admission                                                                                                                                                                                                                                                                                                                                                                                                                                                                                                                                                                                                                                                                                                                                                                                               |
|                                 |                                                                                                                                                                                                                                                                                                                                                                                                                                                                                                                                                                                                                                                                                                                                                                                                                                                                                                                            |

SCHOLARONE™  
Manuscripts

1  
2  
3  
4  
5  
6  
7  
8  
9  
10  
11  
12  
13  
14  
15  
16  
17  
18  
19  
20  
21  
22  
23  
24  
25  
26  
27  
28  
29  
30  
31  
32  
33  
34  
35  
36  
37  
38  
39  
40  
41  
42  
43  
44  
45  
46  
47  
48  
49  
50  
51  
52  
53  
54  
55  
56  
57  
58  
59  
60

# Development and validation of a novel computer-aided score to predict the risk of in-hospital mortality for acutely ill medical admissions in two acute hospitals using their first electronically recorded blood test results and vital signs: a cross-sectional study

## Authors

Muhammad Faisal

*Senior Research Fellow in Medical Statistics*

Faculty of Health Studies, University of Bradford, Bradford, UK

Bradford Institute for Health Research

E-mail: [M.Faisal1@bradford.ac.uk](mailto:M.Faisal1@bradford.ac.uk)

Andrew J Scally, MSc

*Senior Lecturer*

School of Clinical Therapies

University College Cork, Ireland

E-mail: [andrew.scally@ucc.ie](mailto:andrew.scally@ucc.ie)

Natalie Jackson

*Health Informatics Senior Project Manager*

Improvement Academy, Bradford Institute for Health Research

E-mail: [Natalie.jackson@yhahsn.nhs.uk](mailto:Natalie.jackson@yhahsn.nhs.uk)

Donald Richardson

*Consultant Renal Physician*

Department of Renal Medicine, York Teaching Hospital NHS Foundation Trust Hospital

E-mail: [drichardson@doctors.org.uk](mailto:drichardson@doctors.org.uk)

Kevin Beatson

*Development Manager*

York Teaching Hospital NHS Foundation Trust

E-mail: [Kevin.Beatson@York.NHS.uk](mailto:Kevin.Beatson@York.NHS.uk)

Robin Howes

*Operational Manager for Electronic Patient Records*

Department of Strategy & Planning

Northern Lincolnshire and Goole Hospitals

E-mail: [robin.howes@nhs.net](mailto:robin.howes@nhs.net)

Kevin Speed

*Consultant Haematologist*

Northern Lincolnshire and Goole Hospitals

E-mail: [kevin.speed@nhs.net](mailto:kevin.speed@nhs.net)

Madhav Menon

*Consultant in respiratory medicine*

Northern Lincolnshire and Goole Hospitals

1  
2  
3 E-mail: [madhav.menon1@nhs.net](mailto:madhav.menon1@nhs.net)  
4

5 Jeremy Daws

6 *Head of Quality Assurance*

7 Northern Lincolnshire and Goole Hospitals

8 E-mail: [Jeremy.daws@nhs.net](mailto:Jeremy.daws@nhs.net)  
9

10 Judith Dyson

11 *Senior Lecturer Mental Health*

12 University Of Hull

13 E-mail: [J.Dyson@hull.ac.uk](mailto:J.Dyson@hull.ac.uk)  
14

15 Claire Marsh

16 *Senior Research Fellow/ Patient & Public Engagement Lead*

17 Improvement Academy, Bradford Institute for Health Research

18 E-mail: [claire.marsh@bthft.nhs.uk](mailto:claire.marsh@bthft.nhs.uk)  
19

20 Mohammed A Mohammed

21 *Professor of Healthcare Quality & Effectiveness*

22 Faculty of Health Studies, University of Bradford, Bradford, UK

23 Deputy Director of the Bradford Institute for Health Research

24 Academic Director to the Yorkshire & Humberside Academic Health Sciences Network

25 E-mail: [M.A.Mohammed5@Bradford.ac.uk](mailto:M.A.Mohammed5@Bradford.ac.uk)  
26

27  
28 Corresponding author: Mohammed A Mohammed [M.A.Mohammed5@Bradford.ac.uk](mailto:M.A.Mohammed5@Bradford.ac.uk)  
29  
30  
31  
32  
33  
34  
35  
36  
37  
38  
39  
40  
41  
42  
43  
44  
45  
46  
47  
48  
49  
50  
51  
52  
53  
54  
55  
56  
57  
58  
59  
60

## Abstract

**Objectives:** There are no established mortality risk equations specifically for emergency medical patients who are admitted to a general hospital ward. Such risk equations may be useful in supporting the clinical decision making process. We aim to develop and externally validate a computer-aided risk of mortality (CARM) score by combining the first electronically recorded vital signs and blood test results for emergency medical admissions.

**Design:** Logistic regression model development and external validation study.

**Setting:** Two acute hospitals (NH – model development data; YH – external validation data).

**Participants:** Adult ( $\geq 16$  years) medical admissions discharged over a 24 month period with electronic NEWS and blood test results recorded on admission.

**Results:** The risk of in-hospital mortality following emergency medical admission was 5.7% (NH: 1766/30996) and 6.5% (YH: 1703/26247). The c-statistic for the CARM score in NH was 0.87 (95% CI 0.86 to 0.88) and was similar in an external hospital setting YH (0.86, 95% CI 0.85 to 0.87) and the calibration slope included 1 (0.97, 95% CI 0.94 to 1.00).

**Conclusions:** We have developed a novel, externally validated CARM score with good performance characteristics for estimating the risk of in-hospital mortality following an emergency medical admission using the patient's first, electronically recorded, vital signs and blood tests results. Since the CARM score places no additional data collection burden on clinicians and is readily automated, it may now be carefully introduced and evaluated in hospitals with sufficient informatics infrastructure.

**Key words:** computer aided risk score, hospital mortality, vital signs and blood test, national early warning score, emergency admission

**Article Summary**

- This study provides a novel computer-aided risk of mortality (CARM) score by combining the first electronically recorded vital signs and blood test results for emergency medical admissions.
- CARM is externally validated and places no additional data collection burden on clinicians and is readily automated.
- About 20-30% of admissions do not have both NEWS and blood test results and so CARM is not applicable to these admissions.

For peer review only



## Introduction

Unplanned or emergency medical admissions to hospital involve patients with a broad spectrum disease and illness severity [1]. The appropriate early assessment and management of such admissions can be a critical factor in ensuring high quality care [2]. A number of scoring systems have been developed which may support this clinical decision making process but few have been externally validated [1]. We propose to develop a computer aided risk of in-hospital mortality score, following emergency medical admission that automatically combines two routinely collected, electronically recorded, clinical data sets – vital signs and blood test results. There is some evidence to suggest that the results of routinely undertaken blood tests and/or vital signs data may be useful in predicting the risk of death [1].

In the United Kingdom (UK) National Health Service (NHS), the patient's vital signs are monitored and summarised into a National Early Warning Score(s) (NEWS) that is mandated by the Royal College of Physicians (London) [3]. NEWS is derived from seven physiological variables or vital signs – respiration rate, oxygen saturations, any supplemental oxygen, temperature, systolic blood pressure, heart rate and level of consciousness (Alert, Voice, Pain, Unresponsive) – which are routinely collected by nursing staff as an integral part of the process of care, usually for all patients, and then repeated thereafter depending on local hospital protocols [3]. The use of NEWS is relevant because “Patients die not from their disease but from the disordered physiology caused by the disease” [4]. NEWS points are allocated according to basic clinical observations and the higher the NEWS the more likely it is that the patient is developing a critical illness (see appendix for further details of the NEWS). The clinical rationale for NEWS is that early recognition of deterioration in the vital signs of a patient can provide opportunities for earlier, more effective intervention. Furthermore, studies have shown that electronically collected NEWS are highly reliable and accurate when compared with paper based methods [5–8].

1  
2  
3 Blood tests are an integral part of clinical medicine, and are routinely undertaken during a patient's  
4 stay in hospital. Typically, routine blood tests consist of a core list of seven biochemical and  
5 haematological tests, (albumin, creatinine, potassium, sodium, urea, haemoglobin, white blood cell  
6 count) and, in the absence of contraindications and subject to patient consent, almost all patients  
7 admitted to hospital undergo these tests on admission. Furthermore, in the UK National Health  
8 Service (NHS) creatinine blood test results are now used to identify patients at risk of Acute Kidney  
9 Injury (AKI) [9] which is an important cause of avoidable patient harm [10].

10  
11  
12  
13  
14  
15  
16  
17  
18 In this paper, we investigate the extent to which the vital signs and blood test results of acutely ill  
19 patients can be used to predict the risk of in-hospital mortality following emergency admission to  
20 hospital. Our aim is to develop and validate an automated, Computer Aided Risk of Mortality (CARM)  
21 model, using the patient's first, electronically recorded, vital signs and blood test results which are  
22 usually available within a few hours of emergency admission without requiring any additional data  
23 items or prompts from clinicians. CARM, therefore, is designed for use in hospitals with sufficient  
24 informatics infrastructure.

## 32 33 34 Methods

### 35 36 Setting & data

37  
38  
39 Our cohorts of emergency medical admissions are from three acute hospitals which are  
40 approximately 100 kilometres apart in the Yorkshire & Humberside region of England – the Diana,  
41 Princess of Wales Hospital (n~400 beds) and Scunthorpe General Hospital (n~400 beds) managed by  
42 the Northern Lincolnshire and Goole NHS Foundation Trust (NLAG), and York Hospital (YH) (n~700  
43 beds) (managed by York Teaching Hospitals NHS Foundation Trust). The data from the two acute  
44 hospitals from NLAG are combined because this reflects how the hospitals are managed and are  
45 referred to as NLAG Hospitals (NH), which essentially places our study in two acute hospitals. Our  
46 study hospitals (NH, YH respectively) have been exclusively using electronic NEWS scoring since at  
47 least 2013 as part of their in-house electronic patient record systems. We chose these hospitals

1  
2  
3 because they had electronic NEWS which are collected as part of the patient's process of care and  
4  
5 were agreeable to the study. We did not approach any other hospital.  
6

7  
8 We considered all adult (age $\geq$ 16 years) emergency medical admissions, discharged during a 24-  
9  
10 month period (1 January 2014 to 31 December 2015), with blood test results and NEWS. For each  
11  
12 admission, we obtained a pseudonymised patient identifier, the patient's age (years), sex  
13  
14 (male/female), discharge status (alive/dead), admission and discharge date and time, and electronic  
15  
16 NEWS. The NEWS ranged from 0 (indicating the lowest severity of illness) to 19 (the maximum  
17  
18 NEWS value possible is 20). The admission/discharge date and electronically recorded NEWS are  
19  
20 date and time stamped and the index NEWS was defined as the first electronically recorded score  
21  
22 within  $\pm$ 24 hours of the admission time. The first blood test results were defined as the first full set  
23  
24 of blood tests results recorded within 4 days (96 hours) of admission (>90% of blood test results  
25  
26 were within  $\pm$ 24 hours of admission - see table S1 in appendix).  
27

28  
29 For model development purposes, we were unable to consider emergency admissions without  
30  
31 complete blood test results and NEWS recorded – this constituted 16.5% (6104/37100) of records in  
32  
33 NH and 28.6% (10504/36751) of records in YH. We excluded records for the following reasons: (1)  
34  
35 Records where the first NEWS was after 24 hours of admission and/or (2) where the first blood test  
36  
37 was after 4 days of admission because these “delayed” data were considered less likely to reflect the  
38  
39 sickness profile of patients on admission. Moreover, the time from admission to first blood test  
40  
41 results was usually several hours earlier than the actual time of admission because blood tests can  
42  
43 be ordered in the emergency department before formal admission (see figure S1 in appendix).  
44  
45  
46  
47  
48

## 49 Development of a Computer Aided Risk of Mortality (CARM) Score

50  
51 We began with exploratory analyses including line plots and box plots that showed the relationship  
52  
53 between covariates and risk of in-hospital death in our hospitals. We developed a logistic regression  
54  
55 model, known as CARM, to predict the risk of in-hospital death with the following covariates: Age  
56  
57  
58  
59

1  
2  
3 (years), Sex (Male/Female), NEWS (including its components, plus diastolic blood pressure, as  
4 separate covariates), blood test results (albumin, creatinine, haemoglobin, potassium, sodium, urea,  
5 and white cell count), and Acute Kidney Injury (AKI) score. The primary rationale for using these  
6 variables is that they are routinely collected as part of process of care and their inclusion in our  
7 statistical models is on clinical grounds as opposed to the statistical significance of any given  
8 covariate. The widespread use of these variables in routine clinical care means that our model is  
9 more likely to be generalisable to other settings.  
10

11  
12 We used the *qladder* function (*Stata* [11]), which displays the quantiles of transformed variable  
13 against the quantiles of a normal distribution according to the ladder powers  
14 ( $x^3, x^2, x^1, x, \sqrt{x}, \log(x), x^{-1}, x^{-2}, x^{-3}$ ) for each variable continuous covariate and chose the  
15 following transformations:- (creatinine)<sup>-1/2</sup>, log<sub>e</sub>(potassium), log<sub>e</sub>(white cell count), log<sub>e</sub>(urea), log<sub>e</sub>  
16 (respiratory rate), log<sub>e</sub>(pulse rate), log<sub>e</sub>(systolic blood pressure), and log<sub>e</sub>(diastolic blood pressure). We  
17 used an automated approach to search for all two-way interactions and incorporated those  
18 interactions which were statistically significant (p<0.001) implemented in the MASS library [12] in R  
19 [13].  
20

21  
22 We developed the CARM model to predict the risk of in-hospital mortality following emergency  
23 medical admission using data from NH (the development dataset) and we externally validated this  
24 model, reporting discrimination and calibration characteristics [14], using data from another hospital  
25 (YH) (the external validation dataset). The data from YH is not used for model development but as an  
26 external validation dataset only. We internally validated the CARM using a bootstrapping method  
27 that is implemented in the *rms* library [15] in R to estimate statistical optimism [14,15].  
28

29  
30 Discrimination relates to how well a model can separate, (or discriminate between), those who died  
31 and those who did not. Calibration measures a model's ability to generate predictions that are on  
32 average close to the average observed outcome. Overall statistical performance was assessed using  
33 the scaled Brier score which incorporates both discrimination and calibration [14]. The Brier score is  
34  
35  
36  
37  
38  
39  
40  
41  
42  
43  
44  
45  
46  
47  
48  
49  
50  
51  
52  
53  
54  
55  
56  
57  
58  
59  
60

1  
2  
3 the squared difference between actual outcomes and predicted risk of death, scaled by the  
4  
5 maximum Brier score such that the scaled Brier score ranges from 0–100%. Interpretation of the  
6  
7 scaled Brier score is similar to  $R^2$ . Higher values indicate superior models. Calibration is the  
8  
9 relationship between the observed and predicted risk of death and can be readily seen on a scatter  
10  
11 plot (y-axis observed risk, x-axis predicted risk). Perfect predictions should be on the 45° line. The  
12  
13 intercept (a) and slope (b) of this line gives an assessment of ‘calibration-in-the-large’ [16]. At model  
14  
15 development,  $a=0$  and  $b=1$ , but at validation, calibration-in-the-large problems are indicated if a is  
16  
17 not 0 and if b is more/less than 1 as this reflects problems of under/over prediction [17].  
18  
19

20 The concordance statistic (c-statistic) is a commonly used measure of discrimination. For a binary  
21  
22 outcome, the c-statistic is the area under the Receiver Operating Characteristics (ROC) curve. The  
23  
24 ROC curve is a plot of the sensitivity, (true positive rate), versus 1-specificity, (false positive rate), for  
25  
26 consecutive predicted risks [14]. The area under the ROC curve is interpreted as the probability that  
27  
28 a deceased patient has a higher predicted risk of death than a randomly chosen non-deceased  
29  
30 patient. A c-statistic of 0.5 is no better than tossing a coin, whilst a perfect model has a c-statistic of  
31  
32 1. The higher the c-statistic, the better the model. In general, values less than 0.7 are considered to  
33  
34 show poor discrimination, values of 0.7–0.8 can be described as reasonable, and values above 0.8  
35  
36 suggest good discrimination [18]. The 95% confidence interval for the c-statistic was derived using  
37  
38 DeLong’s method as implemented in the *pROC* library [19] in *R* [13]. Box plots showing the risk of  
39  
40 death for those discharged alive and dead are a simple way to visualise the discrimination of each  
41  
42 model. The difference in the mean predicted risk of death for those who were discharged alive and  
43  
44 dead is a measure of the discrimination slope. The higher the slope, the better the discrimination  
45  
46 [14]. We followed the TRIPOD guidelines for model development and validation [20]. All analyses  
47  
48 were carried using *R* [13] and *Stata* [11].  
49  
50  
51  
52  
53  
54  
55  
56  
57  
58  
59  
60

## Ethical approval

This study received ethical approval from The Yorkshire & Humberside Leeds West Research Ethics Committee on 17 September 2015 (ref. 173753), with NHS management permissions received January 2016.

## Patient and Public Involvement

A workshop with a patient and service user group, linked to the University of Bradford, was involved at the start of this project to co-design the agenda for the patient and staff focus groups which were subsequently held at each hospital site. Patients were invited to attend the patient focus group through existing patient and public involvement groups. The criteria used for recruitment to these focus group was any member of the public who had been a patient or carer in the last five years. The patient and public voice continued to be included throughout the project with three patient representatives invited to sit on the project steering group. Participants will be informed of the results of this study through the patient and public involvement leads at each hospital site and the project team have met with the Bradford Patient and service user group to discuss the results.

## Data Sharing Statement

Our data sharing agreement with the two hospitals (York hospital & NLAG hospital) does not permit us to share this data with other parties. Nonetheless if anyone is interested in the data, then they should contact the R&D offices at each hospital in the first instance.

## Results

### Cohort description

We considered emergency medical admissions in each hospital (NH:n=37100, YH:n=36751) over the 24-month period. Of these 16.5% (6104/37100) in NH and 28.6% (10504/36751) in YH were not eligible for our study because they did not have NEWS recorded within  $\pm 24$  hours of admission

1  
2  
3 and/or full complement of blood test results within  $\pm 96$  hours of admission (see Table 1, Table S1  
4 and Figure S1). At YH, 24.2% of records were excluded because no or incomplete blood test results  
5 were recorded compared with only 10% in NH. Exclusions due to lack of NEWS data were less  
6 marked between YH and NH (see Table S2 in appendix for characteristic of emergency admissions  
7 with incomplete data).  
8  
9

10  
11  
12  
13 The in-hospital mortality was 5.7% (1766/30996) in NH and 6.5% (1703/26247) in YH. The age, sex,  
14 NEWS and blood test results profile is shown Table 2. Admissions in YH were older, with higher  
15 NEWS, higher AKI scores (AKI stage 3 is more common than stage 2 in YH) but higher albumin blood  
16 test results than NH. YH has a renal unit whereas NH does not.  
17  
18  
19

20  
21  
22 Figures S2 to S5 (see appendix) show box plots and line plots for each continuous (untransformed)  
23 covariate that was included in the CARM model for NH and YH respectively. The box plots (figures S2  
24 & S3 in appendix) show a similar pattern in each hospital. Compared with patients discharged alive,  
25 the deceased patients were aged older, with lower albumin, haemoglobin and sodium values, and  
26 higher creatinine, potassium, white cell count and urea values. NEWS was higher in deceased  
27 patients compared with patients discharged alive, as respiratory rate and pulse rate were higher in  
28 deceased patients. However, the temperature, blood pressure and oxygen saturation were lower in  
29 deceased patients. The line plots in the appendix (figures S4 & S5 in appendix) show that the  
30 relationship between a given continuous covariate and the risk of death is similar in each hospital.  
31  
32  
33  
34  
35  
36  
37  
38  
39  
40

## 41 42 Statistical Modelling of CARM 43 44

45 We assessed the performance of the CARM model to predict the risk of in-hospital mortality. The  
46 model coefficients in logit scale with examples are shown in the appendix (see Table S3). Table 3  
47 shows the performance of the model in the development and validation dataset. Figure 1 shows the  
48 ROC plots of CARM in the development and validation datasets (see Figure S6 in the appendix for  
49 ROC plots comparing CARM versus NEWS). The c-statistic was high in the development dataset 0.87  
50 [95% CI 0.86 - 0.88] and the external validation dataset 0.86 [95% CI 0.85 - 0.87]. Likewise, the  
51  
52  
53  
54  
55  
56  
57  
58  
59  
60

1  
2  
3 scaled Brier score and discrimination were similar in the development and external validation  
4 datasets. The calibration slope is 0.97 (95%CI 0.94 to 1.00), which is good (see appendix Figure S7).  
5  
6  
7 The final CARM model, which is not intended for paper-based use, is shown in the appendix with  
8  
9 accompanying internal and external validation plots (see appendix figure S7).  
10

11  
12 We excluded 10.0% (NH) and 24.2% (YH) of emergency admissions from the development and  
13 validation dataset respectively, because they had no or incomplete set of blood test results  
14 reported. We examined the performance of the CARM model in these excluded records by first  
15 imputing age and sex specific median blood test results, and then applying the CARM model to these  
16 admissions only. The last column in Table 3 shows the subsequent c-statistics in these imputed  
17 records only. The c-statistics for these imputed records were not markedly different in the  
18 development and validation dataset (see Figure S8 appendix for corresponding ROC plots).  
19  
20  
21  
22  
23  
24  
25  
26

27 Table 4 shows the sensitivity, specificity and positive & negative predictive values along with  
28 likelihood ratio (LR+/LR-) for a selected range of cut-off values for the risk of dying, which tentatively  
29 suggests that a threshold risk of 8% provides a reasonable balance between sensitivity (around 70%)  
30 and specificity (more than 80% in development and validation datasets – see table 4 and figure S9 in  
31 appendix). Furthermore, the CARM model performance is good in each hospital in various subgroups  
32 such as, by sex, age, seasons, longer vs. shorter length of stay admissions, day of the week, and 16  
33 CCI disease groups (see table S4 in appendix).  
34  
35  
36  
37  
38  
39  
40  
41  
42  
43  
44  
45  
46  
47  
48  
49  
50  
51  
52  
53  
54  
55  
56  
57  
58  
59  
60



## Discussion

We have shown that it is feasible to use the first electronically-recorded vital signs and blood test results of an emergency medical patient to predict the risk of in-hospital mortality following emergency medical admission. We developed our CARM model in one hospital and externally validated in data from another hospital. We found that CARM has good performance and our findings tentatively suggest that a cut-off of 8% predicted risk of in-hospital mortality death appears to strike a reasonable balance between sensitivity and specificity.

Whilst several previous studies [1] have used blood test results [21–28] or patient physiology [29,30] to predict the risk of in-hospital mortality, few studies have combined these two data sources [31–34] and even fewer reported external validation [1]. Our study is based on data from two different hospitals with material differences in recording of blood test results but still yielding similar performance of CARM. This suggests that our approach, which merits further study, may be generalisable to other UK NHS hospitals with electronically-recorded blood test results and NEWS – especially as the use of NEWS in the UK NHS is mandated and that our approach does not rely on reference ranges from blood tests which can vary between hospitals. Indeed, a recent paper with sepsis as the outcome variable also showed promising results by combining the first blood test results and NEWS [35].

There are a number of limitations in our study. There appears to be a systematic difference in the prevalence of oxygen supplementation in the development and validation datasets, which may warrant further investigation. However, the prevalence ratios (dead/alive) are similar in both groups (2.77 and 3.29 for NH and YH, respectively) and therefore this should have no significant detrimental effect on the validity of our model. Although we focused on in-hospital mortality (because we aimed to aid clinical decision making in the hospital), the impact of this selection bias needs to be assessed by capturing out-of-hospital mortality by linking death certification data and hospital data. CARM, like other risk scores, can only be an aid to the decision-making process of clinical teams [1,18] and

1  
2  
3 its usefulness in clinical practice remains to be seen. We found that up to about ¼ of emergency  
4  
5 medical admissions had no (or an incomplete set of) recorded blood test results for whom we tested  
6  
7 a simple median imputation strategy without knowing why such data was missing. We found that  
8  
9 the performance of CARM did not materially deteriorate in these admissions. We do not suggest  
10  
11 that our imputation method is an optimal imputation strategy. Rather we offer it as a simple,  
12  
13 pragmatic, preliminary imputation strategy, which is akin to the AKI detection algorithm which also  
14  
15 imputes the median creatinine value where required [36]. Further work on how to optimally address  
16  
17 the issue of missing data is required. We did not undertake an imputation exercise for patients with  
18  
19 no recorded NEWS because they constituted a much smaller proportion of missing data (<5%), and  
20  
21 NEWS is not recommended in patients requiring immediate resuscitation, direct admission to  
22  
23 intensive care, and patients with end-stage renal failure or with acute intracranial conditions [37].  
24  
25 We have used the first set of electronically recorded vital signs and blood test results to develop  
26  
27 CARM, but updating CARM scores in real-time when new data becomes available is likely to be  
28  
29 important to clinical teams and so warrants further study. Finally, our external validation was  
30  
31 undertaken by the same research team in a similar context of the NHS. Further external validation by  
32  
33 different research teams in different settings would be useful.  
34  
35

36  
37 We have designed CARM to be used in hospitals with sufficient informatics infrastructure (eg  
38  
39 electronic health records) [38,39]. CARM is not targeting specific emergency medical patients only.  
40  
41 Rather, we are seeking to raise situational awareness of the risk of death in-hospital as early as  
42  
43 possible, without requiring any additional data items or prompts from clinicians. Whilst we have  
44  
45 demonstrated that CARM has potential, we have yet to test its use in routine clinical practice. This is  
46  
47 important because we need to demonstrate that CARM does more “good” than “harm” in practice  
48  
49 [38,39]. For example, whilst routine blood tests are not indicated in a considerable number of  
50  
51 emergency medical admissions, it is nevertheless possible that for a given patient, some clinicians  
52  
53 (eg less experienced) may be tempted to order routine blood tests so that they can obtain a CARM  
54  
55  
56  
57  
58  
59  
60

1  
2  
3 score to support their clinical decision-making process. So, the next phase of this work is to field test  
4  
5 CARM by carefully engineering it into routine clinical practice to see if it does enhance the quality of  
6  
7 care for acutely ill patients, whilst noting any unintended consequences.  
8  
9

## 10 Conclusion

11  
12 We have developed a novel, externally validated CARM model, with good performance for  
13  
14 estimating the risk of in-hospital mortality following emergency medical admission using the  
15  
16 patient's first, electronically recorded, vital signs and blood test results. Since CARM places no  
17  
18 additional data collection burden on clinicians and is readily automated, it may now be carefully  
19  
20 introduced and evaluated in hospitals with electronic health records.  
21  
22  
23  
24

## 25 Acknowledgements

26  
27 The authors would like to express their gratitude to Sue Rushbrook and Gary Hardcastle at York  
28  
29 Hospital for their support in obtaining the data frame, and to Laura Lamming at the University of  
30  
31 Bradford for her support with the Ethics application.  
32  
33

## 34 Funding

35  
36 This research was supported by the Health Foundation. The Health Foundation is an independent  
37  
38 charity working to improve the quality of health care in the UK.  
39

40  
41 This research was supported by the National Institute for Health Research (NIHR) Yorkshire and  
42  
43 Humberside Patient Safety Translational Research Centre (NIHR YHPSTRC). The views expressed in  
44  
45 this article are those of the author(s) and not necessarily those of the NHS, the NIHR, or the  
46  
47 Department of Health and Social Care.  
48

## 49 Contributorship

50  
51 MAM & DR had the original idea for this work. NJ was overall study coordinator with JeD as local  
52  
53 NLAG coordinator. MF, AS and MAM undertook the statistical analyses. JuD, CM & NJ are leads for  
54  
55 qualitative studies. RH and KB extracted the necessary data frames. DR, MM and KS gave a clinical  
56  
57  
58  
59

perspective. MAM and MF wrote the first draft of this paper and all authors subsequently assisted in redrafting and have approved the final version. MAM will act as guarantor.

**Competing Interests:** The authors declare no conflicts of interest.

**Table 1 Number and mortality of emergency medical admissions included/excluded.**

| Characteristic                                                   | Development dataset | Validation dataset |
|------------------------------------------------------------------|---------------------|--------------------|
|                                                                  | N (%)               | N (%)              |
| Total emergency medical admissions                               | 37100               | 36751              |
| Excluded: No NEWS recorded (%)                                   | 1305 (3.5)          | 772 (2.1)          |
| Excluded: First NEWS after 24 hours of admission (%)             | 634 (1.7)           | 172 (0.5)          |
| Excluded: First blood test results after 4 days of admission (%) | 464 (1.3)           | 673 (1.8)          |
| Excluded: No or incomplete blood test results recorded (%)       | 3701 (10.0)         | 8887 (24.2)        |
| Total excluded (%)                                               | 6104 (16.5)         | 10504 (28.6)       |
| Total included (%)                                               | 30996 (83.5)        | 26247 (71.4)       |

**Table 2 Characteristics of emergency admissions for development and validation datasets.**

| Characteristic                                  | Development dataset (NH) |                 | Validation dataset (YH) |                 |
|-------------------------------------------------|--------------------------|-----------------|-------------------------|-----------------|
|                                                 | Discharged Alive         | Discharged Died | Discharged Alive        | Discharged Died |
| N                                               | 29230                    | 1766            | 24544                   | 1703            |
| Median Length of Stay (days) (IQR)              | 4.3 (8.3)                | 8.3 (13.3)      | 3.9 (7.7)               | 8.1 (14.1)      |
| Male (%)                                        | 14557 (49.8)             | 887 (50.2)      | 11646 (47.5)            | 845 (49.6)      |
| Mean NEWS (SD)                                  | 2.1 (2.2)                | 4.5 (3.2)       | 2.5 (2.5)               | 5.0 (3.6)       |
| Alertness                                       |                          |                 |                         |                 |
| Alert (%)                                       | 28788 (98.5)             | 1613 (91.3)     | 23953 (97.6)            | 1503 (88.3)     |
| Pain (%)                                        | 80 (0.3)                 | 31 (1.8)        | 131 (0.5)               | 49 (2.9)        |
| Voice (%)                                       | 315 (1.1)                | 83 (4.7)        | 357 (1.5)               | 106 (6.2)       |
| Unconscious (%)                                 | 47 (0.2)                 | 39 (2.2)        | 103 (0.4)               | 45 (2.6)        |
| AKI Score                                       |                          |                 |                         |                 |
| 0 (%)                                           | 27063 (92.6)             | 1326 (75.1)     | 22133 (90.2)            | 936 (55.0)      |
| 1 (%)                                           | 1358 (4.7)               | 204 (11.6)      | 1482 (6.0)              | 451 (26.5)      |
| 2 (%)                                           | 429 (1.5)                | 129 (7.3)       | 369 (1.5)               | 191 (11.2)      |
| 3 (%)                                           | 380 (1.3)                | 107 (6.1)       | 560 (2.3)               | 125 (7.3)       |
| Oxygen supplementation (%)                      | 5364 (18.4)              | 900 (51.0)      | 2549 (10.4)             | 582 (34.2)      |
| Mean Age [years] (SD)                           | 66.2 (19.5)              | 79.8 (11.1)     | 67.5 (19.4)             | 80 (11.7)       |
| Mean Albumin [g/L] (SD)                         | 33.7 (5.9)               | 27.3 (6.4)      | 38.2 (5.7)              | 32.9 (6)        |
| Mean Creatinine [ $\mu\text{mol/L}$ ] (SD)      | 103.3 (78.2)             | 148.9 (124.4)   | 100.8 (90.6)            | 138.7 (119)     |
| Mean Haemoglobin [g/l] (SD)                     | 127.8 (22.2)             | 117.1 (22.8)    | 125.2 (22)              | 117.1 (23.2)    |
| Mean Potassium [mmol/L] (SD)                    | 4.1 (0.6)                | 4.3 (0.8)       | 4.3 (0.6)               | 4.4 (0.8)       |
| Mean Sodium [mmol/L] (SD)                       | 137 (5.1)                | 136 (7)         | 136.6 (4.6)             | 136.1 (6.2)     |
| Mean White cell count [ $10^9$ cells/L] (SD)    | 9.8 (6.5)                | 13.2 (13.3)     | 10.2 (10.7)             | 13.9 (21.1)     |
| Mean Urea [mmol/L] (SD)                         | 7.5 (5.6)                | 14.1 (10.5)     | 7.8 (5.6)               | 13.3 (8.9)      |
| Mean Respiratory rate [breaths per minute] (SD) | 18 (3.5)                 | 20.1 (4.8)      | 18.6 (4.6)              | 21.7 (6.8)      |
| Mean Temperature [ $^{\circ}\text{C}$ ] (SD)    | 36.5 (0.7)               | 36.3 (0.8)      | 36.3 (0.8)              | 36.1 (1.1)      |
| Mean Systolic pressure [mmHg] (SD)              | 129.6 (22.7)             | 119.8 (24.8)    | 136.1 (27.2)            | 128.5 (30.3)    |
| Mean Diastolic pressure [mmHg] (SD)             | 75 (14.8)                | 69.5 (15.8)     | 75.4 (15.5)             | 71.3 (17.7)     |
| Mean Pulse rate [beats per minute] (SD)         | 81.3 (17.7)              | 86.5 (19.7)     | 86.2 (20.9)             | 92.1 (23.3)     |
| Mean % Oxygen saturation (SD)                   | 96.0 (2.9)               | 94.6 (4.7)      | 96.3 (2.9)              | 95.0 (4.4)      |

**Table 3 Comparing calibration and discrimination of CARM model to predict in-hospital mortality in development and validation datasets**

| Dataset             | Mean predicted risk: Alive | Mean predicted risk: Died‡ | Discrimination slope† | Scaled Brier Score | AUC [95% CI]                           | Median Imputed AUC [95% CI] |
|---------------------|----------------------------|----------------------------|-----------------------|--------------------|----------------------------------------|-----------------------------|
| Development dataset | 0.047                      | 0.229                      | 0.183                 | 0.175              | 0.874 <sup>#</sup><br>[0.866 to 0.881] | 0.915<br>[0.888 to 0.941]   |
| Validation dataset  | 0.053                      | 0.231                      | 0.178                 | 0.165              | 0.861<br>[0.852 to 0.869]              | 0.900<br>[0.880 to 0.919]   |

NB:

† mean predicted risk difference between who discharged died and discharged alive.

‡ Died in-hospital following emergency admission

# corrected optimism (original = 0.874, and corrected=0.873).

**Table 4 Sensitivity, specificity and predictive values for the CARM model at various cut-offs in the development dataset and validation dataset**

| Dataset             | Risk Value Cut-off | No of patients > cutoff | %Sensitivity (95% CI)  | %Specificity (95% CI)  | %PPV (95% CI)          | %NPV (95% CI)          | LR+ (95% CI)        | LR- (95% CI)        |
|---------------------|--------------------|-------------------------|------------------------|------------------------|------------------------|------------------------|---------------------|---------------------|
| Development dataset | 0.01               | 19876                   | 98.5<br>(97.9 to 99)   | 38<br>(37.4 to 38.5)   | 8.8<br>(8.4 to 9.2)    | 99.8<br>(99.7 to 99.8) | 1.6<br>(1.6 to 1.6) | 0<br>(0 to 0.1)     |
|                     | 0.02               | 15297                   | 95.7<br>(94.6 to 96.6) | 53.4<br>(52.9 to 54)   | 11<br>(10.6 to 11.6)   | 99.5<br>(99.4 to 99.6) | 2.1<br>(2 to 2.1)   | 0.1<br>(0.1 to 0.1) |
|                     | 0.04               | 10382                   | 87.3<br>(85.6 to 88.8) | 69.8<br>(69.2 to 70.3) | 14.8<br>(14.2 to 15.5) | 98.9<br>(98.8 to 99)   | 2.9<br>(2.8 to 3)   | 0.2<br>(0.2 to 0.2) |
|                     | 0.08               | 6070                    | 72.2<br>(70 to 74.3)   | 83.6<br>(83.2 to 84)   | 21<br>(20 to 22.1)     | 98<br>(97.8 to 98.2)   | 4.4<br>(4.2 to 4.6) | 0.3<br>(0.3 to 0.4) |
|                     | 0.20               | 2190                    | 42<br>(39.6 to 44.3)   | 95<br>(94.8 to 95.3)   | 33.8<br>(31.9 to 35.9) | 96.4<br>(96.2 to 96.7) | 8.5<br>(7.9 to 9.1) | 0.6<br>(0.6 to 0.6) |
| Validation dataset  | 0.01               | 18338                   | 98.4<br>(97.7 to 99)   | 32.1<br>(31.5 to 32.7) | 9.1<br>(8.7 to 9.6)    | 99.7<br>(99.5 to 99.8) | 1.4<br>(1.4 to 1.5) | 0<br>(0 to 0.1)     |
|                     | 0.02               | 14537                   | 95.9<br>(94.9 to 96.8) | 47.4<br>(46.8 to 48.1) | 11.2<br>(10.7 to 11.8) | 99.4<br>(99.3 to 99.5) | 1.8<br>(1.8 to 1.9) | 0.1<br>(0.1 to 0.1) |
|                     | 0.04               | 10047                   | 89<br>(87.4 to 90.4)   | 65.2<br>(64.6 to 65.8) | 15.1<br>(14.4 to 15.8) | 98.8<br>(98.7 to 99)   | 2.6<br>(2.5 to 2.6) | 0.2<br>(0.1 to 0.2) |
|                     | 0.08               | 5871                    | 73.2<br>(71 to 75.3)   | 81.2<br>(80.7 to 81.6) | 21.2<br>(20.2 to 22.3) | 97.8<br>(97.5 to 98)   | 3.9<br>(3.7 to 4)   | 0.3<br>(0.3 to 0.4) |
|                     | 0.20               | 2158                    | 43.1<br>(40.7 to 45.5) | 94.2<br>(93.9 to 94.5) | 34<br>(32 to 36.1)     | 96<br>(95.7 to 96.2)   | 7.4<br>(6.9 to 8)   | 0.6<br>(0.6 to 0.6) |

PPV = Positive Predictive Value; NPV = Negative Predictive Value;  
LR+ = Positive Likelihood Ratio; LR- = Negative Likelihood Ratio

**Figure 1 Area under the Receiver Operating Characteristic curve for development dataset (0.87) and validation dataset (0.86).**

## References

- 1 Brabrand M, Folkestad L, Clausen NG, *et al*. Risk scoring systems for adults admitted to the emergency department: a systematic review. *Scand J Trauma Resusc Emerg Med* 2010;**18**:8. doi:10.1186/1757-7241-18-8
- 2 Silke B, Kellett J, Rooney T, *et al*. An improved medical admissions risk system using multivariable fractional polynomial logistic regression modelling. *QJM An Int J Med* 2010;**103**:23–32. doi:10.1093/qjmed/hcp149
- 3 Royal College of Physicians: National Early Warning Score (NEWS): Standardising the assessment of acute illness severity in the NHS <https://www.rcplondon.ac.uk/news/nhs-england-approves-use-national-early-warning-score-news-2-improve-detection-acutely-il>.
- 4 McGinley A, Pearse RM. A national early warning score for acutely ill patients. *BMJ* 2012;**345**:e5310.
- 5 Smith GB, Prytherch DR, Schmidt P, *et al*. Hospital-wide physiological surveillance—A new approach to the early identification and management of the sick patient. *Resuscitation* 2006;**71**:19–28. doi:10.1016/j.resuscitation.2006.03.008
- 6 Edwards M, McKay H, Van Leuvan C, *et al*. Modified Early Warning Scores: inaccurate summation or inaccurate assignment of score? *Crit Care* 2010;**14**:P257. doi:10.1186/cc8489
- 7 Prytherch DR, Smith GB, Schmidt P, *et al*. Calculating early warning scores—a classroom comparison of pen and paper and hand-held computer methods. *Resuscitation* 2006;**70**:173–8. doi:10.1016/j.resuscitation.2005.12.002
- 8 Mohammed M, Hayton R, Clements G, *et al*. Improving accuracy and efficiency of early warning scores in acute care. *Br J Nurs*; **18**:18–24. doi:10.12968/bjon.2009.18.1.32072
- 9 NHS England: Acute Kidney Injury (AKI) Programme. <http://www.thinkkidneys.nhs.uk>, 2014. <http://www.england.nhs.uk/ourwork/patientsafety/akiprogramme/>.
- 10 NCEPOD: Acute Kidney Injury: Adding Insult to Injury. National Confidential Enquiry into Patient Outcome and Death, 2009.
- 11 StatCorp. Stata: Release 13. Statistical Software. College Station, TX: StataCorp LP; 2014.
- 12 Venables W, Ripley B. *Modern Applied Statistics with S*. Fourth Edn. New York: Springer 2002.
- 13 R Development Core Team. R: A language and environment for statistical computing. R Foundation for Statistical Computing <http://www.r-project.org/>. 2015.
- 14 Steyerberg EW. *Clinical Prediction Models. A practical approach to development, validation and updating*. Springer 2008.
- 15 Harrell FE. rms: Regression Modeling Strategies <http://cran.r-project.org/package=rms>. 2015.
- 16 Cox DR. Two further applications of a model for binary regression. *Biometrika* 1958;**45**:562–5. doi:10.1093/biomet/45.3-4.562
- 17 Steyerberg EW, Vickers AJ, Cook NR, *et al*. Assessing the performance of prediction models: a framework for traditional and novel measures. *Epidemiology* 2010;**21**:128–38. doi:10.1097/EDE.0b013e3181c30fb2



- 1  
2  
3 18 Hanley JA, McNeil BJ. The meaning and use of the area under a receiver operating  
4 characteristic (ROC) curve. *Radiology* 1982;**143**:29–36. doi:10.1148/radiology.143.1.7063747
- 5  
6 19 Robin X, Turck N, Hainard A, *et al.* pROC: an open-source package for R and S+ to analyze and  
7 compare ROC curves. *BMC Bioinformatics* 2011;**12**:77. doi:10.1186/1471-2105-12-77
- 8  
9 20 Moons KGM, Altman DG, Reitsma JB, *et al.* Transparent Reporting of a multivariable  
10 prediction model for Individual Prognosis Or Diagnosis (TRIPOD): Explanation and  
11 Elaboration. *Ann Intern Med* 2015;**162**:W1. doi:10.7326/M14-0698
- 12  
13 21 Prytherch DR, Sirl JS, Weaver PC, *et al.* Towards a national clinical minimum data set for  
14 general surgery. *Br J Surg* 2003;**90**:1300–5. doi:10.1002/bjs.4274
- 15  
16 22 Prytherch DR, Sirl JS, Schmidt P, *et al.* The use of routine laboratory data to predict in-hospital  
17 death in medical admissions. *Resuscitation* 2005;**66**:203–7.  
18 doi:10.1016/j.resuscitation.2005.02.011
- 19  
20 23 Pine M, Jones B, Lou YB. Laboratory values improve predictions of hospital mortality. *Int J*  
21 *Qual Heal care J Int Soc Qual Heal Care* 1998;**10**:491–501.
- 22  
23 24 Vroonhof K, van Solinge WW, Rovers MM, *et al.* Differences in mortality on the basis of  
24 laboratory parameters in an unselected population at the Emergency Department. *Clin Chem*  
25 *Lab Med* 2005;**43**:536–41. doi:10.1515/CCLM.2005.093
- 26  
27 25 Hucker TR, Mitchell GP, Blake LD, *et al.* Identifying the sick: can biochemical measurements  
28 be used to aid decision making on presentation to the accident and emergency department.  
29 *Br J Anaesth* 2005;**94**:735–41. doi:10.1093/bja/aei122
- 30  
31 26 Froom P, Shimoni Z. Prediction of Hospital Mortality Rates by Admission Laboratory Tests.  
32 *Clin Chem* 2005;**52**:325–8. doi:10.1373/clinchem.2005.059030
- 33  
34 27 Asadollahi K, Hastings IM, Gill G V, *et al.* Prediction of hospital mortality from admission  
35 laboratory data and patient age: A simple model. *Emerg Med Australas* 2011;**23**:354–63.  
36 doi:10.1111/j.1742-6723.2011.01410.x
- 37  
38 28 ten Boekel E, Vroonhof K, Huisman A, *et al.* Clinical laboratory findings associated with in-  
39 hospital mortality. *Clin Chim Acta* 2006;**372**:1–13. doi:10.1016/J.CCA.2006.03.024
- 40  
41 29 Duckitt RW, Buxton-Thomas R, Walker J, *et al.* Worthing physiological scoring system:  
42 derivation and validation of a physiological early-warning system for medical admissions. An  
43 observational, population-based single-centre study†‡. *BJA Br J Anaesth* 2007;**98**:769–74.  
44 doi:10.1093/bja/aem097
- 45  
46 30 Hodgetts TJ, Kenward G, Vlachonikolis IG, *et al.* The identification of risk factors for cardiac  
47 arrest and formulation of activation criteria to alert a medical emergency team. *Resuscitation*  
48 **2002**;**54**:125–31.
- 49  
50 31 Prytherch DR, Briggs JS, Weaver PC, *et al.* Measuring clinical performance using routinely  
51 collected clinical data. *Med Inform Internet Med* 2005;**30**:151–6.  
52 doi:10.1080/14639230500298966
- 53  
54 32 Silke B, Kellett J, Rooney T, *et al.* An improved medical admissions risk system using  
55 multivariable fractional polynomial logistic regression modelling. *QJM* 2010;**103**:23–32.  
56 doi:10.1093/qjmed/hcp149
- 57  
58  
59  
60

- 1  
2  
3 33 O'Sullivan E, Callely E, O'Riordan D, *et al.* Predicting outcomes in emergency medical  
4 admissions - role of laboratory data and co-morbidity. *Acute Med* 2012;**11**:59–65.  
5  
6 34 Mohammed M a., Rudge G, Watson D, *et al.* Index Blood Tests and National Early Warning  
7 Scores within 24 Hours of Emergency Admission Can Predict the Risk of In-Hospital Mortality:  
8 A Model Development and Validation Study. *PLoS One* 2013;**8**.  
9 doi:10.1371/journal.pone.0064340  
10  
11 35 Faisal M, Scally A, Richardson D, *et al.* Development and External Validation of an Automated  
12 Computer-Aided Risk Score for Predicting Sepsis in Emergency Medical Admissions Using the  
13 Patient's First Electronically Recorded Vital Signs and Blood Test Results. *Crit Care Med*  
14 2018;**46**:612–8. doi:10.1097/CCM.0000000000002967  
15  
16 36 Algorithm for detecting Acute Kidney Injury (AKI) based on serum creatinine changes with  
17 time <https://www.england.nhs.uk/wp-content/uploads/2014/06/psa-aki-alg.pdf>. 2014.  
18  
19 37 Silcock DJ, Corfield AR, Gowens PA, *et al.* Validation of the National Early Warning Score in  
20 the prehospital setting. *Resuscitation* 2015;**89**:31–5. doi:10.1016/j.resuscitation.2014.12.029  
21  
22 38 Escobar GJ, Dellinger RP. Early detection, prevention, and mitigation of critical illness outside  
23 intensive care settings. *J Hosp Med* 2016;**11**:S5–10. doi:10.1002/jhm.2653  
24  
25 39 Escobar GJ, Turk BJ, Ragins A, *et al.* Piloting electronic medical record-based early detection  
26 of inpatient deterioration in community hospitals. *J Hosp Med* 2016;**11**:S18–24.  
27 doi:10.1002/jhm.2652  
28  
29  
30  
31  
32  
33  
34  
35  
36  
37  
38  
39  
40  
41  
42  
43  
44  
45  
46  
47  
48  
49  
50  
51  
52  
53  
54  
55  
56  
57  
58  
59  
60

1  
2  
3  
4  
5  
6  
7  
8  
9  
10  
11  
12  
13  
14  
15  
16  
17  
18  
19  
20  
21  
22  
23  
24  
25  
26  
27  
28  
29  
30  
31  
32  
33  
34  
35  
36  
37  
38  
39  
40  
41  
42  
43  
44  
45  
46  
47  
48  
49  
50  
51  
52  
53  
54  
55  
56  
57  
58  
59  
60



Area under the Receiver Operating Characteristic curve for development dataset (0.87) and validation dataset (0.86).

254x127mm (300 x 300 DPI)

## Supplementary Material

The NEWS [<https://www.rcplondon.ac.uk/projects/outputs/national-early-warning-score-news>] is based on a scoring system in which a score is allocated to vital signs physiological measurements already undertaken when patients present to, or are being monitored in hospital. Six physiological parameters form the basis of the scoring system:

| Physiological Parameters | 3     | 2        | 1           | 0           | 1           | 2         | 3                           |
|--------------------------|-------|----------|-------------|-------------|-------------|-----------|-----------------------------|
| Respiration Rate         | ≤8    |          | 9 - 11      | 12 - 20     |             | 21 - 24   | ≥25                         |
| Oxygen Saturations       | ≤91   | 92 - 93  | 94 - 95     | ≥96         |             |           |                             |
| Any Supplemental Oxygen  |       | Yes      |             | No          |             |           |                             |
| Temperature              | ≤35.0 |          | 35.1 - 36.0 | 36.1 - 38.0 | 38.1 - 39.0 | ≥39.1     |                             |
| Systolic BP              | ≤90   | 91 - 100 | 101 - 110   | 111 - 219   |             |           | ≥220                        |
| Heart Rate               | ≤40   |          | 41 - 50     | 51-90       | 91 - 110    | 111 - 130 | ≥131                        |
| Level of Consciousness   |       |          |             | Alert       |             |           | Voice, Pain, or Unconscious |

A score is allocated to each as they are measured, the magnitude of the score reflecting how extreme the parameter varies from the norm. This score is then aggregated, and uplifted for people requiring oxygen.

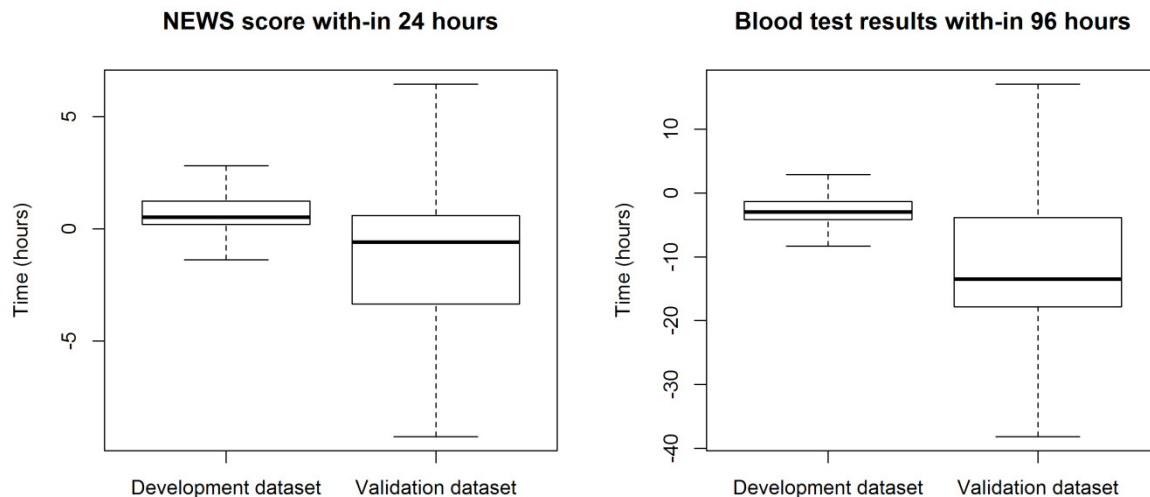

**Figure S1 Distribution of time to first NEWS score and Blood test results for development and validation datasets.**

| Blood tests results recorded | Development dataset<br>N(%) | Validation dataset<br>N(%) |
|------------------------------|-----------------------------|----------------------------|
| within 24 hours              | 29255 (94.4)                | 24341 (92.7)               |
| within 48 hours              | 894 (2.9)                   | 1098 (4.2)                 |
| within 72 hours              | 512 (1.6)                   | 495 (1.9)                  |
| within 96 hours              | 335 (1.1)                   | 313 (1.2)                  |

**Table S1 Distribution of time to the first set of Blood test results recorded within 4 days for development and validation datasets.**

| Characteristic                     | Development dataset | Validation dataset |
|------------------------------------|---------------------|--------------------|
| N                                  | 6104                | 10504              |
| Male (%)                           | 3008 (49.3)         | 4875 (46.4)        |
| Mean Age (SD)                      | 61.4 (20.2)         | 64.7 (21.4)        |
| Median Length of Stay (days) (IQR) | 1.1 (4.0)           | 1.4 (4.4)          |
| In-hospital mortality (%)          | 405 (6.6)           | 434 (4.1)          |

**Table S2 Characteristics of emergency admissions with incomplete data in development and validation datasets.**

| Variable Name                              | Coefficient | Example 1 (Discharged alive) |             |                 | Example 2 (Discharged dead) |             |                 |
|--------------------------------------------|-------------|------------------------------|-------------|-----------------|-----------------------------|-------------|-----------------|
|                                            |             | Values                       | Transformed | Log(Odds)       | Values                      | Transformed | Log(Odds)       |
| Intercept                                  | -3.22       | 1                            | 1           | -3.22           | 1                           | 1           | -3.22           |
| Male                                       | 0.14        | 1                            | 1           | 0.14            | 0                           | 0           | 0               |
| Age                                        | 0.077       | 51                           | 51          | 3.927           | 44                          | 44          | 3.388           |
| Albumin                                    | -0.104      | 36                           | 36          | -3.744          | 11                          | 11          | -1.144          |
| 1/sqrt(Creatinine)                         | 9.883       | 86                           | 0.107832773 | 1.065711        | 153                         | 0.080845    | 0.798993        |
| Haemoglobin                                | 0.002       | 148                          | 148         | 0.296           | 48                          | 48          | 0.096           |
| Log(Potassium)                             | -0.024      | 3.4                          | 1.223775354 | -0.02937        | 6.9                         | 1.931521    | -0.04636        |
| Sodium                                     | -0.023      | 111                          | 111         | -2.553          | 130                         | 130         | -2.99           |
| Log(White Blood Count)                     | 1.167       | 12                           | 2.484906493 | 2.899886        | 34.7                        | 3.546739    | 4.139045        |
| Log(Urea)                                  | 1.211       | 7.8                          | 2.054123604 | 2.487544        | 28.6                        | 3.353407    | 4.060975        |
| <b>AKI (reference 0)</b>                   | 0           | 0                            | 0           | 0               | 0                           | 0           | 0               |
| AKI stage 1                                | 0.131       | 0                            | 0           | 0               | 0                           | 0           | 0               |
| AKI stage 2                                | 0.443       | 0                            | 0           | 0               | 1                           | 1           | 0.443           |
| AKI stage 3                                | -0.388      | 0                            | 0           | 0               | 0                           | 0           | 0               |
| NEWS                                       | 0.093       | 2                            | 2           | 0.186           | 9                           | 9           | 0.837           |
| Log(Respiratory)                           | 0.569       | 16                           | 2.772588547 | 1.577603        | 22                          | 3.091042    | 1.758803        |
| Temperature                                | -0.145      | 36                           | 36          | -5.22           | 36.5                        | 36.5        | -5.2925         |
| Log(Systolic)                              | -0.919      | 133                          | 4.89034882  | -4.49423        | 112                         | 4.718499    | -4.3363         |
| Log(Diastolic)                             | 0.777       | 79                           | 4.369447577 | 3.395061        | 74                          | 4.304065    | 3.344258        |
| Log(Pulse)                                 | 0.511       | 63                           | 4.143134465 | 2.117142        | 149                         | 5.003946    | 2.557016        |
| Oxygen Saturation                          | -0.016      | 94                           | 94          | -1.504          | 95                          | 95          | -1.52           |
| Oxygen supplementation                     | 0.606       | 0                            | 0           | 0               | 0                           | 0           | 0               |
| <b>Alert</b>                               | 0           | 0                            | 0           | 0               | 0                           | 0           | 0               |
| Pain                                       | 0.716       | 0                            | 0           | 0               | 0                           | 0           | 0               |
| Voice                                      | 0.395       | 0                            | 0           | 0               | 0                           | 0           | 0               |
| Unconscious                                | 1.925       | 0                            | 0           | 0               | 1                           | 1           | 1.925           |
| Age * Log(White Cell Count)                | -0.015      | -                            | 126.7302311 | -1.90095        | -                           | 156.0565    | -2.34085        |
| 1/sqrt( Creatinine)* Log(White Cell Count) | 1.481       | -                            | 0.267954358 | 0.39684         | -                           | 0.286737    | 0.424657        |
| AKI stage 3 * 1/sqrt( Creatinine)          | 15.551      | -                            | 0           | 0               | -                           | 0           | 0               |
| <b>Sum of Log(Odds)</b>                    |             | -                            | -           | <b>-4.17677</b> | -                           | -           | <b>2.882744</b> |
| <b>Probability of dying</b>                |             | -                            | -           | <b>0.015116</b> | -                           | -           | <b>0.946987</b> |

**Table S3 Coefficient of CARM model to predict in-hospital mortality with two examples (one discharged alive and one discharged died).**

We accounted a baseline difference in risk of death in the external validation data by adding 0.52 to the CARM logit model using an iterative procedure described elsewhere[1].

- 1 Faisal M, Howes R, Steyerberg EW, *et al.* Using routine blood test results to predict the risk of death for emergency medical admissions to hospital: an external model validation study. *QJM* 2017;**110**:27–31. doi:10.1093/qjmed/hcw110

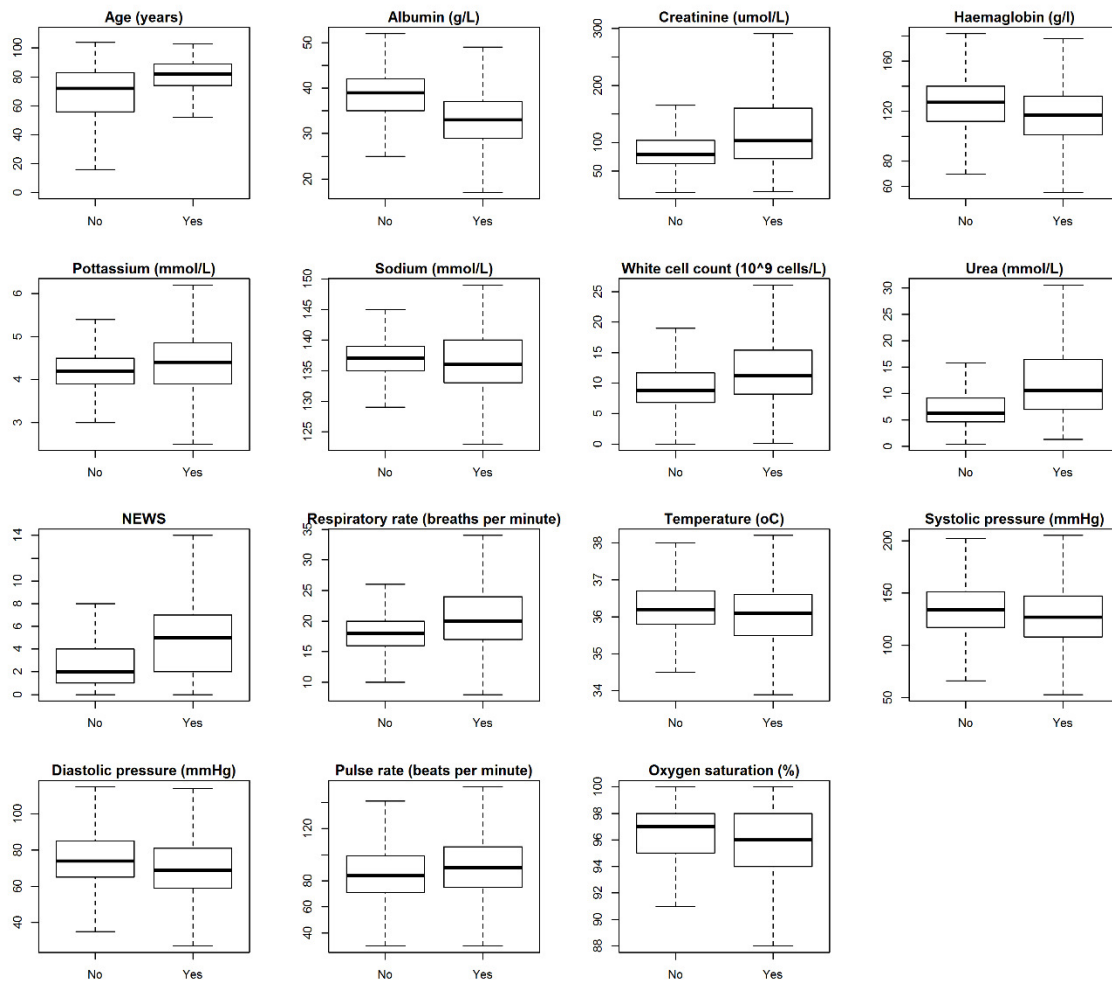

**Figure S2 Boxplot without outliers for continuous covariates with respect to patient's discharge status (Alive/Died) for NLAG hospitals**



**Figure S3 Boxplot without outliers for continuous covariates with respect to patient's discharge status (Alive/Died) for York hospital**





**Figure S4** Line plots showing the observed risk of death with continuous covariates for NLAG hospitals

NB: y-axis range changes in each plot.

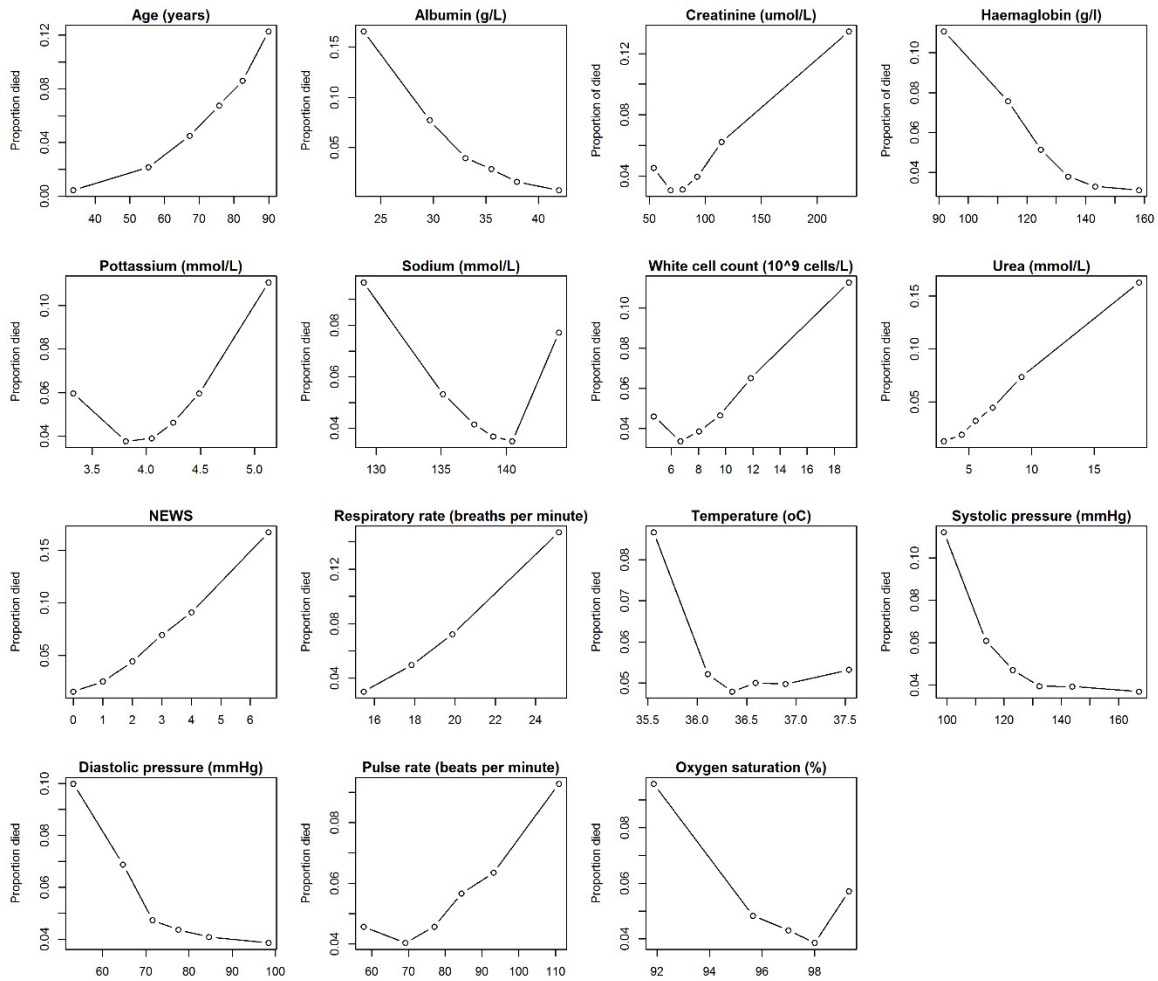

**Figure S5** Line plots showing the observed risk of death with continuous covariates for York hospital.

NB: y-axis range changes in each plot.

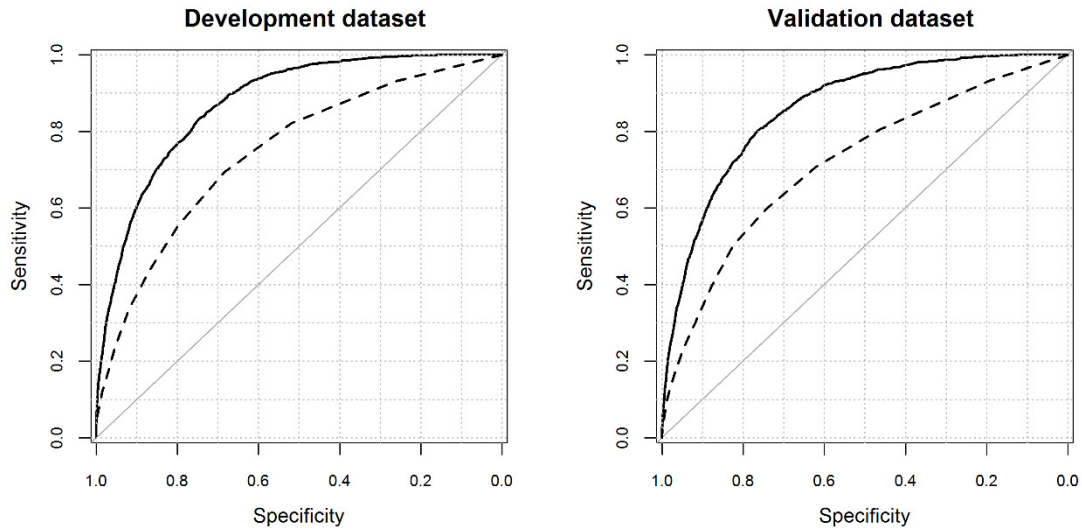

**Figure S6 Area under the Receiver Operating Characteristic curve for development dataset (NEWS =0.75, CARM=0.87) and validation dataset (NEWS=0.72, CARM=0.86).**

Black dashed line for NEWS and black solid line for CARM

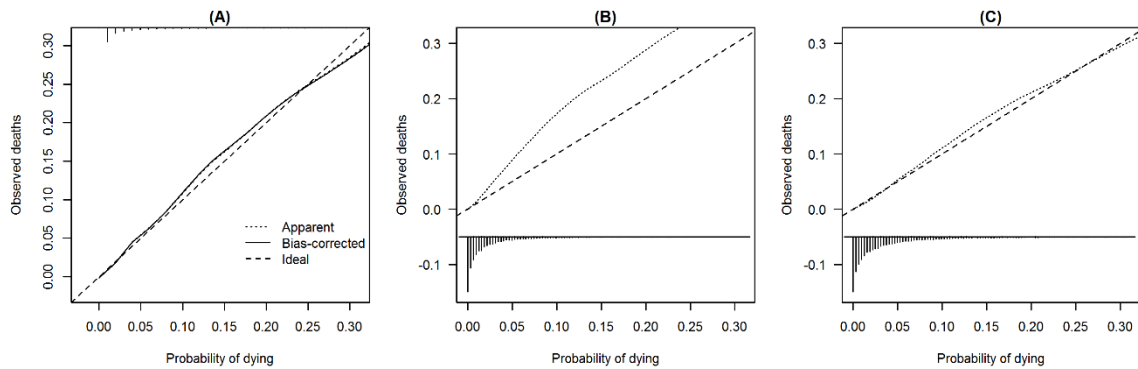

**Figure S7 Internal and external validation with and without re-calibration of CARM model**

(A) Internal validation of development dataset only using bootstrap method (B) performance of CARM model on external validation dataset without any re-calibration (C) performance of CARM model on external validation dataset after correcting for baseline mortality difference (5.7% vs 6.5%).

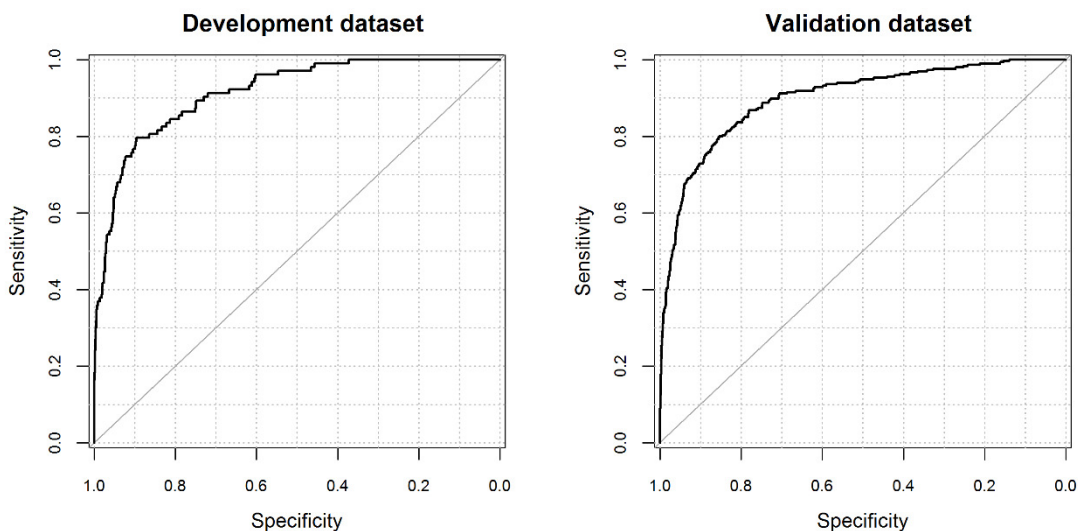

**Figure S8 Receiver Operating Characteristic curve of (median) imputed blood tests results on development dataset and validation dataset.**

NB: patients with imputed values were omitted during model development and validation.

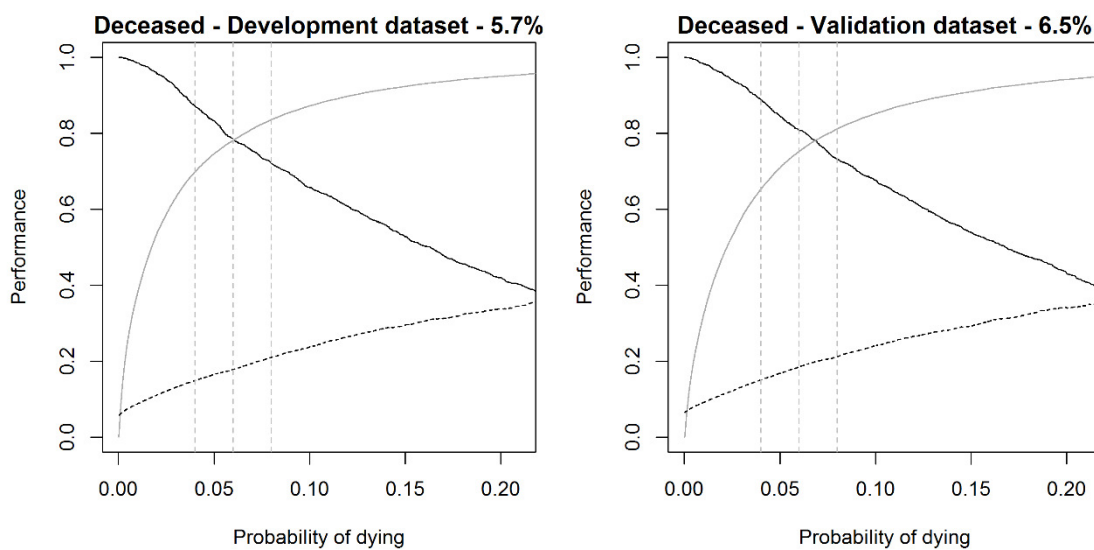

**Figure S9: Sensitivity analysis of CARM model at various thresholds of probability of dying (0.0, 0.01, ..., 0.20) on development dataset and validation dataset.**

Black solid line is for sensitivity and black dashed line is for positive predictive value (PPV). Grey solid line is specificity and grey dashed vertical lines are at thresholds (0.04, 0.06, and 0.08).

NB: We selected thresholds exclusively based on development dataset.

| Characteristics                   | NLAG<br>AUC (95% CI) | York<br>AUC (95% CI) |
|-----------------------------------|----------------------|----------------------|
| <b>Overall</b>                    | 0.87 (0.87 to 0.88)  | 0.86 (0.85 to 0.87)  |
| <b>Sex</b>                        |                      |                      |
| Male                              | 0.87 (0.86 to 0.88)  | 0.85 (0.84 to 0.86)  |
| Female                            | 0.88 (0.87 to 0.89)  | 0.87 (0.86 to 0.88)  |
| <b>Age</b>                        |                      |                      |
| Age $\geq$ 75                     | 0.81 (0.80 to 0.82)  | 0.81 (0.79 to 0.82)  |
| Age $<$ 75                        | 0.91 (0.90 to 0.92)  | 0.89 (0.88 to 0.91)  |
| <b>Seasons</b>                    |                      |                      |
| Spring                            | 0.87 (0.86 to 0.89)  | 0.86 (0.84 to 0.88)  |
| Summer                            | 0.88 (0.87 to 0.90)  | 0.85 (0.83 to 0.87)  |
| Autumn                            | 0.87 (0.86 to 0.89)  | 0.87 (0.86 to 0.89)  |
| Winter                            | 0.87 (0.85 to 0.88)  | 0.86 (0.84 to 0.87)  |
| <b>Length of Stay (LoS)</b>       |                      |                      |
| LoS $\geq$ 5 days                 | 0.77 (0.76 to 0.79)  | 0.75 (0.73 to 0.76)  |
| LoS $<$ 5 days                    | 0.95 (0.94 to 0.96)  | 0.94 (0.93 to 0.95)  |
| <b>Day of the Week</b>            |                      |                      |
| Sunday                            | 0.93 (0.91 to 0.94)  | 0.93 (0.92 to 0.95)  |
| Monday                            | 0.87 (0.85 to 0.89)  | 0.87 (0.84 to 0.89)  |
| Tuesday                           | 0.87 (0.85 to 0.89)  | 0.83 (0.81 to 0.85)  |
| Wednesday                         | 0.86 (0.84 to 0.88)  | 0.84 (0.82 to 0.86)  |
| Thursday                          | 0.86 (0.84 to 0.88)  | 0.86 (0.84 to 0.88)  |
| Friday                            | 0.88 (0.86 to 0.90)  | 0.87 (0.85 to 0.89)  |
| Saturday                          | 0.90 (0.88 to 0.92)  | 0.91 (0.89 to 0.92)  |
| <b>Charlson Comorbidity Index</b> |                      |                      |
| Acute Myocardial                  | 0.84 (0.82 to 0.86)  | 0.81 (0.78 to 0.84)  |
| Congestive Heart                  | 0.77 (0.75 to 0.79)  | 0.75 (0.73 to 0.78)  |
| Peripheral Vascular               | 0.78 (0.74 to 0.82)  | 0.82 (0.79 to 0.86)  |
| Cerebrovascular                   | 0.78 (0.73 to 0.83)  | 0.78 (0.75 to 0.81)  |
| Dementia                          | 0.78 (0.75 to 0.81)  | 0.77 (0.73 to 0.80)  |
| COPD                              | 0.85 (0.84 to 0.87)  | 0.85 (0.83 to 0.86)  |
| Rheumatoid Disease                | 0.87 (0.84 to 0.90)  | 0.83 (0.79 to 0.88)  |
| Peptic Ulcer                      | 0.88 (0.83 to 0.93)  | 0.83 (0.74 to 0.91)  |
| Mild LD (Liver)                   | 0.86 (0.82 to 0.90)  | 0.83 (0.76 to 0.90)  |
| Diabetes                          | 0.85 (0.83 to 0.87)  | 0.84 (0.82 to 0.86)  |
| Diabetes+Complications            | 0.79 (0.69 to 0.89)  | 0.90 (0.85 to 0.95)  |
| Hemiplegia/Paraplegia             | 0.80 (0.75 to 0.85)  | 0.74 (0.67 to 0.81)  |
| RD (Renal)                        | 0.80 (0.78 to 0.82)  | 0.81 (0.78 to 0.83)  |
| Cancer                            | 0.80 (0.78 to 0.83)  | 0.81 (0.78 to 0.84)  |
| Moderate/Severe LD (Liver)        | 0.80 (0.73 to 0.87)  | 0.78 (0.71 to 0.84)  |
| Metastatic Cancer                 | 0.77 (0.74 to 0.80)  | 0.77 (0.74 to 0.81)  |

**Table S4: The c-statistics (95% CI) is showing for CARM model in each hospital by Sex, Age, Seasons, Longer vs. shorter length of stay subjects, Day of the week, and 16 CCI disease groups.**

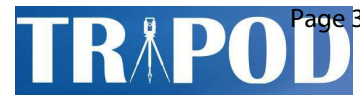

## TRIPOD Checklist: Prediction Model Development and Validation

| Section/Topic                | Item | Checklist Item | Page                                                                                                                                                                                                  |       |
|------------------------------|------|----------------|-------------------------------------------------------------------------------------------------------------------------------------------------------------------------------------------------------|-------|
| <b>Title and abstract</b>    |      |                |                                                                                                                                                                                                       |       |
| Title                        | 1    | D;V            | Identify the study as developing and/or validating a multivariable prediction model, the target population, and the outcome to be predicted.                                                          | 1     |
| Abstract                     | 2    | D;V            | Provide a summary of objectives, study design, setting, participants, sample size, predictors, outcome, statistical analysis, results, and conclusions.                                               | 3     |
| <b>Introduction</b>          |      |                |                                                                                                                                                                                                       |       |
| Background and objectives    | 3a   | D;V            | Explain the medical context (including whether diagnostic or prognostic) and rationale for developing or validating the multivariable prediction model, including references to existing models.      | 5     |
|                              | 3b   | D;V            | Specify the objectives, including whether the study describes the development or validation of the model or both.                                                                                     | 6     |
| <b>Methods</b>               |      |                |                                                                                                                                                                                                       |       |
| Source of data               | 4a   | D;V            | Describe the study design or source of data (e.g., randomized trial, cohort, or registry data), separately for the development and validation data sets, if applicable.                               | 6     |
|                              | 4b   | D;V            | Specify the key study dates, including start of accrual; end of accrual; and, if applicable, end of follow-up.                                                                                        | 7     |
| Participants                 | 5a   | D;V            | Specify key elements of the study setting (e.g., primary care, secondary care, general population) including number and location of centres.                                                          | 7     |
|                              | 5b   | D;V            | Describe eligibility criteria for participants.                                                                                                                                                       | 7     |
|                              | 5c   | D;V            | Give details of treatments received, if relevant.                                                                                                                                                     |       |
| Outcome                      | 6a   | D;V            | Clearly define the outcome that is predicted by the prediction model, including how and when assessed.                                                                                                | 8     |
|                              | 6b   | D;V            | Report any actions to blind assessment of the outcome to be predicted.                                                                                                                                |       |
| Predictors                   | 7a   | D;V            | Clearly define all predictors used in developing or validating the multivariable prediction model, including how and when they were measured.                                                         | 7     |
|                              | 7b   | D;V            | Report any actions to blind assessment of predictors for the outcome and other predictors.                                                                                                            |       |
| Sample size                  | 8    | D;V            | Explain how the study size was arrived at.                                                                                                                                                            | 7     |
| Missing data                 | 9    | D;V            | Describe how missing data were handled (e.g., complete-case analysis, single imputation, multiple imputation) with details of any imputation method.                                                  | 7     |
| Statistical analysis methods | 10a  | D              | Describe how predictors were handled in the analyses.                                                                                                                                                 | 8     |
|                              | 10b  | D              | Specify type of model, all model-building procedures (including any predictor selection), and method for internal validation.                                                                         | 8     |
|                              | 10c  | V              | For validation, describe how the predictions were calculated.                                                                                                                                         | 8     |
|                              | 10d  | D;V            | Specify all measures used to assess model performance and, if relevant, to compare multiple models.                                                                                                   | 8,9   |
|                              | 10e  | V              | Describe any model updating (e.g., recalibration) arising from the validation, if done.                                                                                                               | suppl |
| Risk groups                  | 11   | D;V            | Provide details on how risk groups were created, if done.                                                                                                                                             |       |
| Development vs. validation   | 12   | V              | For validation, identify any differences from the development data in setting, eligibility criteria, outcome, and predictors.                                                                         | 8,9   |
| <b>Results</b>               |      |                |                                                                                                                                                                                                       |       |
| Participants                 | 13a  | D;V            | Describe the flow of participants through the study, including the number of participants with and without the outcome and, if applicable, a summary of the follow-up time. A diagram may be helpful. | 10    |
|                              | 13b  | D;V            | Describe the characteristics of the participants (basic demographics, clinical features, available predictors), including the number of participants with missing data for predictors and outcome.    | 10,11 |
|                              | 13c  | V              | For validation, show a comparison with the development data of the distribution of important variables (demographics, predictors and outcome).                                                        | 11    |
| Model development            | 14a  | D              | Specify the number of participants and outcome events in each analysis.                                                                                                                               | 10    |
|                              | 14b  | D              | If done, report the unadjusted association between each candidate predictor and outcome.                                                                                                              |       |
| Model specification          | 15a  | D              | Present the full prediction model to allow predictions for individuals (i.e., all regression coefficients, and model intercept or baseline survival at a given time point).                           | suppl |
|                              | 15b  | D              | Explain how to use the prediction model.                                                                                                                                                              | suppl |
| Model performance            | 16   | D;V            | Report performance measures (with CIs) for the prediction model.                                                                                                                                      | 11    |
| Model-updating               | 17   | V              | If done, report the results from any model updating (i.e., model specification, model performance).                                                                                                   |       |
| <b>Discussion</b>            |      |                |                                                                                                                                                                                                       |       |
| Limitations                  | 18   | D;V            | Discuss any limitations of the study (such as nonrepresentative sample, few events per predictor, missing data).                                                                                      | 12    |
| Interpretation               | 19a  | V              | For validation, discuss the results with reference to performance in the development data, and any other validation data.                                                                             | 12    |
|                              | 19b  | D;V            | Give an overall interpretation of the results, considering objectives, limitations, results from similar studies, and other relevant evidence.                                                        | 12,13 |
| Implications                 | 20   | D;V            | Discuss the potential clinical use of the model and implications for future research.                                                                                                                 | 13    |
| <b>Other information</b>     |      |                |                                                                                                                                                                                                       |       |
| Supplementary information    | 21   | D;V            | Provide information about the availability of supplementary resources, such as study protocol, Web calculator, and data sets.                                                                         | suppl |
| Funding                      | 22   | D;V            | Give the source of funding and the role of the funders for the present study.                                                                                                                         | 14    |

\*Items relevant only to the development of a prediction model are denoted by D, items relating solely to a validation of a prediction model are denoted by V, and items relating to both are denoted D;V. We recommend using the TRIPOD Checklist in conjunction with the TRIPOD Explanation and Elaboration document.
